# Supplementary material
Source: MDPI journal article supplement (https://www.mdpi.com/2075-163X/11/10/1131)

**Figure S1:** Cover stratigraphy of 35 reverse circulation drill holes and the depths of the collected redox samples (e.g., 07-36229 (depth 5-6 m)).

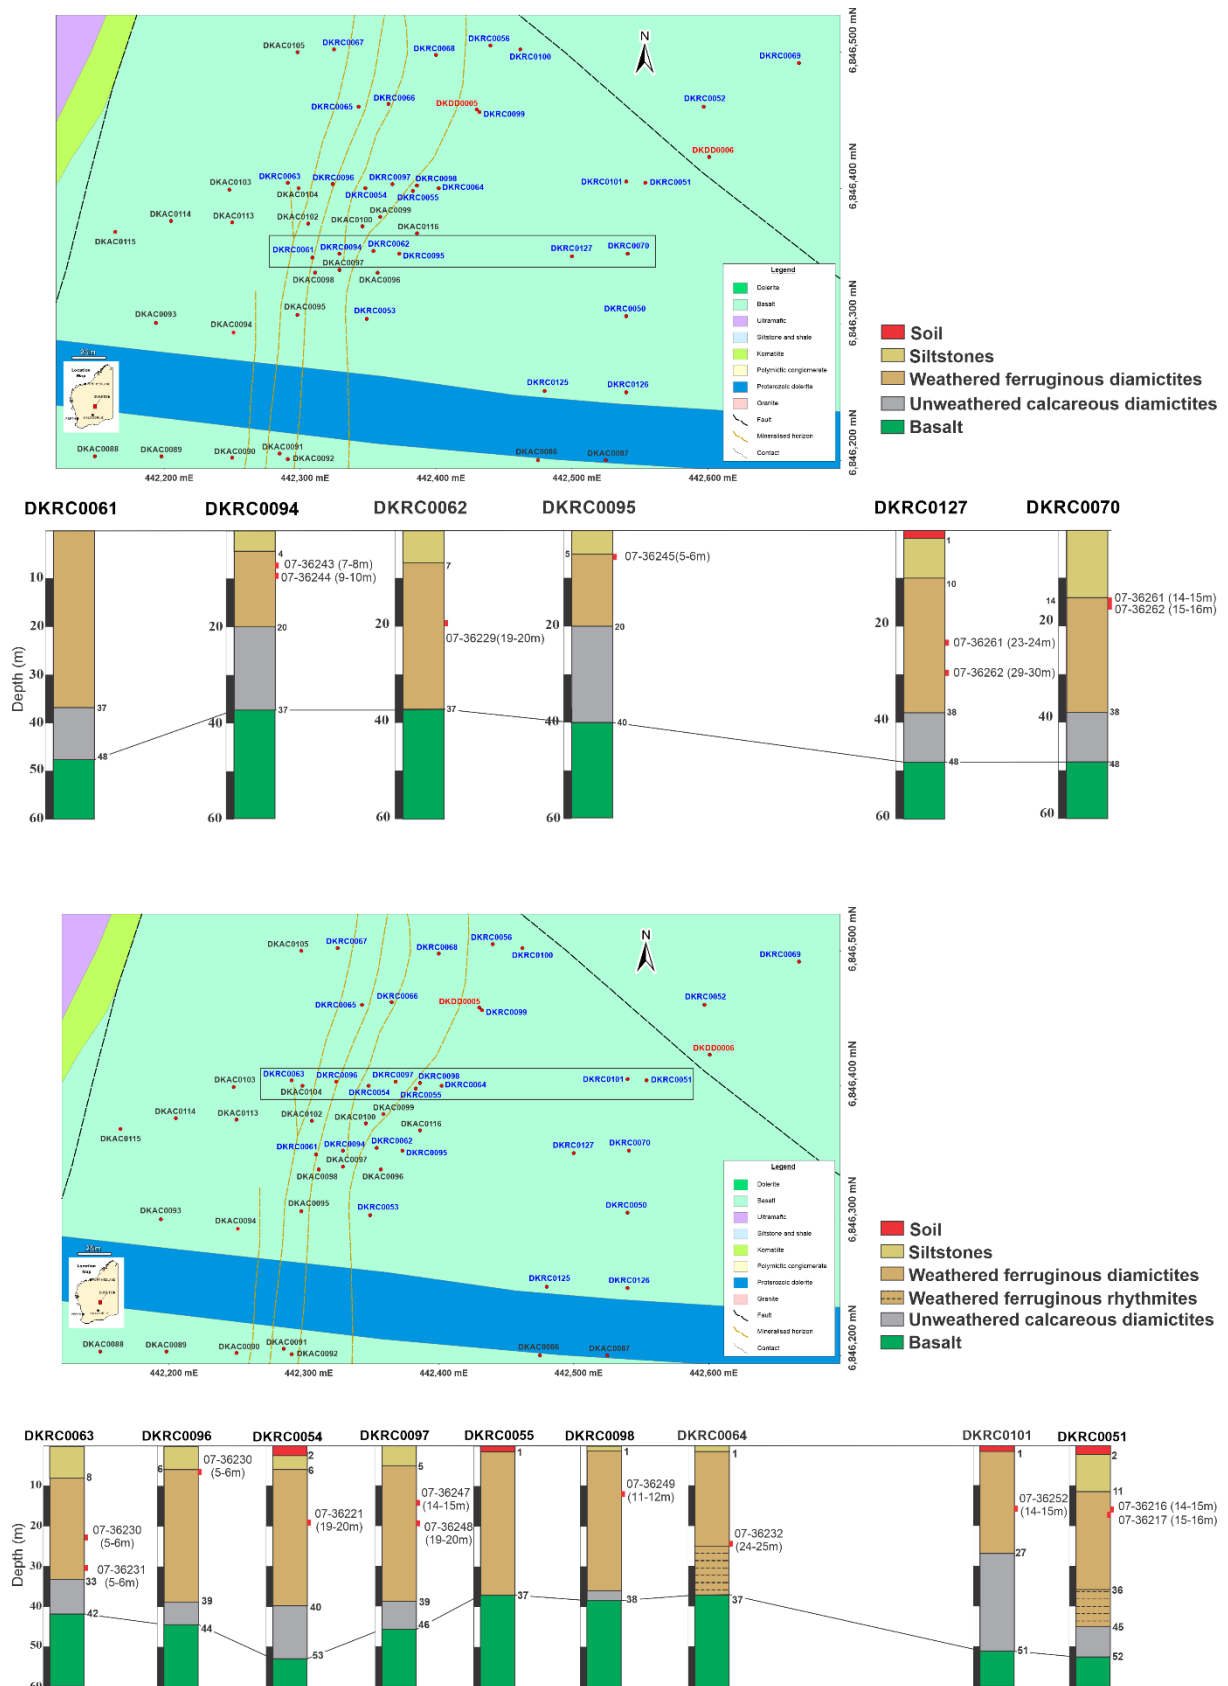

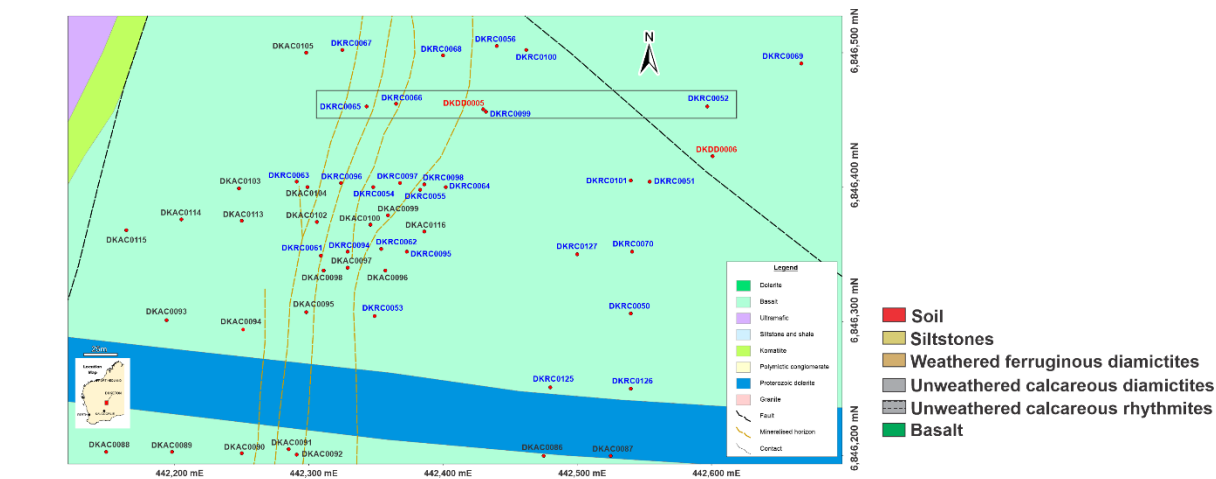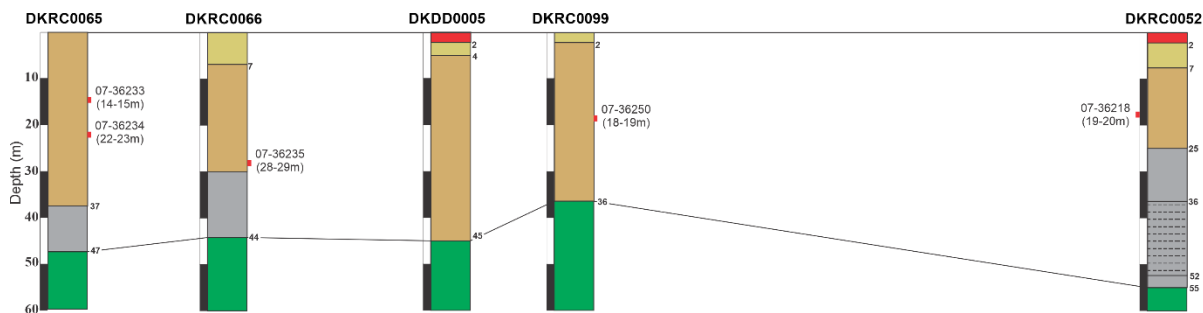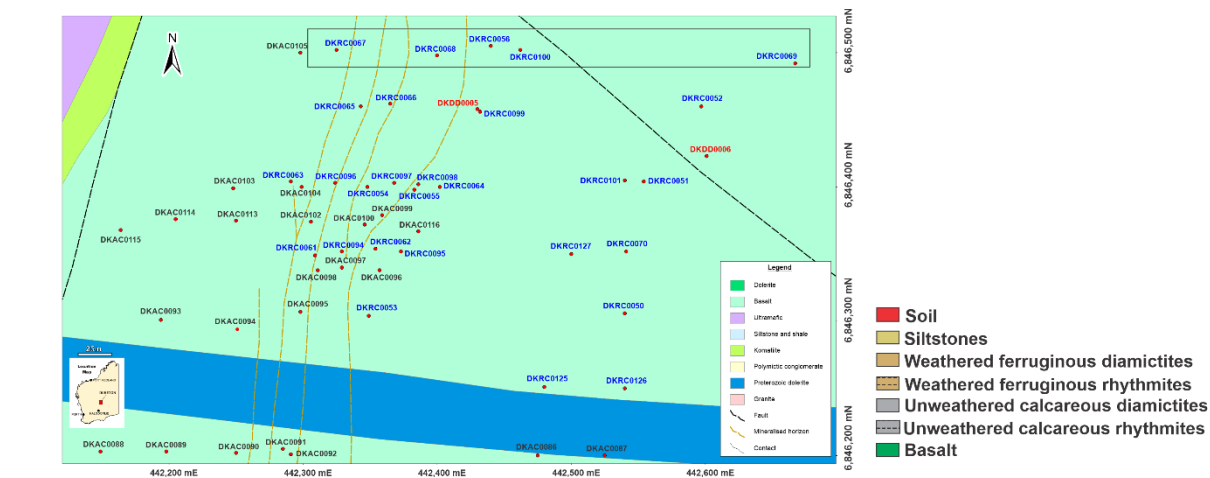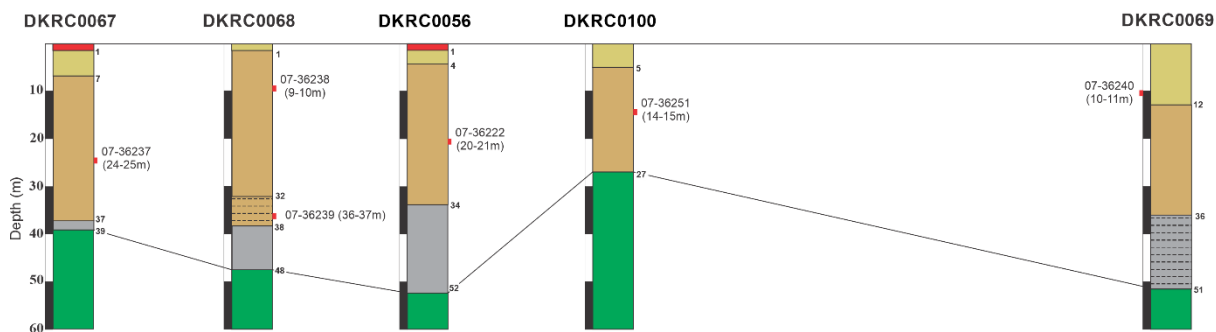

Supplement: s1 [file s1 › Figure S1.pdf]
