# Supplementary material
Source: MDPI journal article supplement (https://www.mdpi.com/2075-163X/11/10/1131)
Supplement: s1 [file s1 › Table S1.xlsx]

## Sheet: Three profiles
Table S1: Excel file contains 5 sheets. Sheet 1: Multielement analyses of three drill holes (DKRC0050, DKRC0051 and DKRC0061) and correlation coefficient. Sheet 2: Multielement analyses of interface samples. Sheet 3: Multielement analyses of redox samples. Sheet 4: Multielement analyses of ore samples. Sheet 5: Heavy minerals sample weight and depths Table S1: Excel file contains 5 sheets. Sheet …
		Elements/oxides	Al2O3	Ba	CaO	Ce	Cr	Dy	Er	Eu	Fe2O3	Gd	Hf	Ho	K2O	La	Lu	MgO	MnO	Na2O	Nb	Nd	P2O5	Pb	Pr	Sc	SiO2	Sm	Sn	Ta	Tb	Th	TiO2	Tm	U	W	Y	Yb	Zr	LOI	Ag	As	Ba	Be	Bi	Cd	Co	Cs	Cu
		Units	%	ppm	%	ppm	ppm	ppm	ppm	ppm	%	ppm	ppm	ppm	%	ppm	ppm	%	%	%	ppm	ppm	%	ppm	ppm	ppm	%	ppm	ppm	ppm	ppm	ppm	%	ppm	ppm	ppm	ppm	ppm	ppm	%	ppm	ppm	ppm	ppm	ppm	ppm	ppm	ppm	ppm
		DL	0.01	1	0.01	0.1	1	0.05	0.05	0.05	0.01	0.05	1	0.05	0.01	0.1	0.05	0.01	0.01	0.01	1	0.1	0.01	1	0.05	1	0.01	0.1	1	0.5	0.05	0.1	0.01	0.05	0.05	1	1	0.1	5	0.01	0.01	0.5	0.2	0.2	0.1	0.05	0.2	0.1	0.2
		Method	AF02																																					LOI	MMA04
Hole ID	Depth (m)	Lab no.
DKRC0050	0-1	07-36125	16	1100	0.83	70.3	132	4.16	2.49	1.22	8.61	4.72	3	0.86	1.21	42.5	0.37	1.32	0.06	0.26	7	30	0.01	11	8.61	20	58.49	5.4	3	0.5	0.71	8.1	0.78	0.36	1.33	1	25	2.3	97	12.44	0.06	37.6	1140	1.3	0.3	0.2	31.8	5.1	65.3
DKRC0050	2-3	07-36126	14.4	706	2.87	122	127	3.42	1.72	1.27	6.71	5.04	4	0.62	2.15	59.1	0.25	1.32	0.03	0.24	10	44.4	0.14	18	13.3	11	59.16	7.4	2	0.8	0.65	13.4	0.56	0.26	1.58	1	15	1.7	128	12.39	0.07	10.7	650	1.3	0.3	< 0.05	6.6	7.4	31.8
DKRC0050	4-5	07-36127	14.3	736	0.62	129	151	4.37	2.07	1.63	7.25	6.31	4	0.77	2.59	58.3	0.31	1.47	0.04	0.26	12	51.3	0.15	25	14.5	13	62.69	9.2	2	0.9	0.82	15.5	0.62	0.3	1.69	2	17	2.1	157	9.98	0.09	11	667	1.5	0.4	< 0.05	7.2	8	34.9
DKRC0050	6-7	07-36128	14.4	604	0.37	105	162	3.49	1.76	1.27	9.03	5.1	4	0.65	2.84	48.7	0.28	1.21	0.04	0.31	11	41.5	0.1	23	11.4	18	60.13	7.3	2	0.8	0.65	15.7	0.6	0.27	1.68	2	15	1.9	139	10.93	0.09	10.3	632	1.6	0.4	< 0.05	6	8	31.6
DKRC0050	8-9	07-36129	14.5	564	0.37	89.5	162	3.48	1.8	1.25	7.95	4.88	4	0.63	3.01	43.4	0.27	1.35	0.03	0.39	11	34.5	0.06	25	9.68	13	62.47	6.2	2	0.9	0.65	15	0.62	0.28	1.7	2	16	1.9	148	9.23	0.09	8.8	560	1.7	0.4	< 0.05	6.8	9.3	39.6
DKRC0050	10-11	07-36130	15.9	629	0.41	86.1	149	3.05	1.77	0.99	5.25	4.07	4	0.59	3.31	43	0.3	1.47	0.02	0.46	12	29.9	0.08	21	8.97	15	62.85	5.2	2	1	0.54	12.5	0.61	0.27	1.53	2	15	1.9	155	9.63	0.11	6.3	586	1.6	0.4	< 0.05	5.4	9	26.8
DKRC0050	12-13	07-36131	16.6	1000	0.36	67.5	184	3.32	2.18	0.97	2.42	3.94	4	0.68	3.48	32.6	0.34	1.21	0.01	0.68	11	26.4	0.07	15	7.45	16	65.25	4.7	2	0.9	0.55	15.1	0.67	0.34	1.47	2	21	2.3	154	9.24	0.08	2.7	764	1.8	0.4	< 0.05	4.1	7.4	18.9
DKRC0050	14-15	07-36132	13.4	591	0.54	48.1	141	6.1	4.26	1.03	5.33	5.09	4	1.41	2.18	21	0.56	1	0.07	2.04	6	21.2	0.11	12	5.67	14	68.74	4.2	1	< 0.5	0.9	6.1	0.56	0.63	1.54	2	47	3.9	134	6.04	0.04	10.4	617	1.6	0.2	< 0.05	10.3	6.4	40.6
DKRC0050	16-17	07-36133	13.3	1390	0.5	54.3	122	6.96	5.11	1.44	6.74	5.94	5	1.55	2.37	23.1	0.73	0.97	0.51	1.86	6	26.4	0.09	18	6.09	13	67.14	6.5	1	< 0.5	1.05	6.4	0.52	0.81	2.03	2	53	5	179	6.03	0.04	7.6	1270	2.3	0.2	0.05	48.8	4	46.6
DKRC0050	17-18	07-36134	12.5	690	0.47	48.8	109	3.65	2.51	0.94	5.62	3.86	4	0.81	2.76	22.9	0.34	1.05	0.13	1.61	7	19.8	0.06	10	5.63	13	69.03	3.9	1	0.5	0.59	6.9	0.51	0.38	2.14	1	27	2.4	169	6.25	0.05	6.4	680	1.6	0.2	< 0.05	28.6	3.9	31.5
DKRC0050	20-21	07-36135	14.3	566	0.71	61.5	163	23.2	17.7	3.16	7.07	16.2	3	5.57	1.85	21.7	2.51	1.17	0.2	2.2	5	43.1	0.19	8	9.15	18	64.89	12	< 1	< 0.5	3.26	4.2	0.59	2.75	2.5	2	223	17.5	125	6.84	0.08	6.9	606	2.9	0.4	< 0.05	82.6	4.6	63.3
DKRC0050	22-23	07-36136	12.9	575	0.89	42.3	226	7.77	5.24	1.7	3.75	7.69	4	1.76	1.98	20.1	0.68	1.49	0.25	2.63	5	22.8	0.18	14	5.22	13	70.22	6	< 1	< 0.5	1.25	4.8	0.52	0.77	1.37	1	62	4.6	171	5.21	0.08	5.5	553	4.6	0.1	0.12	63.8	1.6	36.8
DKRC0050	24-25	07-36137	11.8	518	1.14	29.4	108	2.16	1.3	0.76	4.24	2.46	4	0.44	2.1	14.7	0.17	1.28	0.11	2.68	4	13.8	0.14	13	3.71	9	71.28	2.7	< 1	< 0.5	0.36	3.6	0.45	0.2	1.03	2	13	1.3	142	4.74	0.04	4.5	514	2.1	0.5	0.11	10.6	1	18.5
DKRC0050	26-27	07-36138	12.6	535	2.04	36.1	132	2.48	1.42	0.9	5.84	2.75	3	0.49	1.93	16	0.19	1.84	0.14	2.78	5	15.3	0.13	17	4.06	12	67.47	3.2	1	< 0.5	0.42	3.4	0.57	0.22	0.93	2	14	1.5	118	4.67	0.05	3.5	496	1.2	0.2	0.07	19.4	1.5	28.5
DKRC0050	28-29	07-36139	13.7	590	2.03	35.1	142	2.25	1.29	0.9	4.12	2.71	3	0.45	2.01	17.1	0.15	1.93	0.13	3.37	4	15.7	0.12	22	4.21	13	67.72	3.1	< 1	< 0.5	0.39	3.8	0.47	0.19	1	2	13	1.2	115	4.41	0.05	5.8	573	1.2	0.1	0.05	12.3	1.2	20.8
DKRC0050	30-31	07-36140	12.4	599	1.39	33.6	128	2.13	1.2	0.84	4.2	2.52	4	0.43	2.11	17	0.15	1.33	0.09	3.07	4	15	0.03	19	4.04	11	70.9	2.9	< 1	< 0.5	0.36	3.8	0.45	0.19	1.02	2	12	1.2	140	3.99	0.05	2.2	554	1.3	0.3	0.07	15.6	1.9	30.1
DKRC0050	32-33	07-36141	12.5	531	4.88	35	115	1.95	1.11	0.78	3.86	2.4	3	0.39	1.94	16.9	0.16	1.86	0.11	3.07	5	14.7	0.05	18	4.04	9	65.9	2.7	< 1	< 0.5	0.34	4.3	0.45	0.17	1.29	2	11	1.1	128	5.39	0.05	1.9	523	1.3	0.2	< 0.05	12.7	1.2	25.3
DKRC0050	34-35	07-36142	14.3	483	3.29	49.3	71	2.02	1.14	0.93	4.17	2.49	3	0.39	1.71	24.3	0.15	1.81	0.07	3.57	5	18.1	0.16	21	5.34	8	68.2	3	1	0.5	0.35	5.3	0.42	0.17	0.93	2	11	1.2	127	2.31	0.05	0.7	435	1.1	< 0.1	< 0.05	10.8	0.9	18
DKRC0050	36-37	07-36143	12.5	601	4.83	54.4	104	2.49	1.31	1.05	3.74	3.28	4	0.47	2.39	26.5	0.17	1.7	0.12	3.12	6	22.3	0.14	20	6.17	10	65.92	4.1	< 1	< 0.5	0.45	14.1	0.46	0.2	1.59	3	14	1.3	158	5.07	0.05	1.6	578	1.6	0.2	0.05	11.5	2.1	22.3
DKRC0050	38-39	07-36144	11.9	502	1.19	26.5	96	1.89	1.23	0.68	3.11	2.03	3	0.4	1.96	13	0.19	1.27	0.04	3.15	4	11.4	0.12	12	3.03	9	74.11	2.2	1	< 0.5	0.3	3.1	0.33	0.2	0.75	1	11	1.5	115	2.82	0.04	3.4	480	1.2	0.1	< 0.05	9.1	1	14.3
DKRC0050	40-41	07-36146	12.2	474	1.09	35.4	114	2.85	1.72	0.99	4.05	3.19	4	0.58	2.08	16.4	0.21	1.8	0.06	2.72	5	16	0.14	21	4.21	15	72.09	3.4	1	< 0.5	0.49	4.9	0.49	0.24	1.13	2	16	1.5	150	3.29	0.05	5.6	485	1.3	0.1	0.08	13.2	1.5	27.2
DKRC0050	42-43	07-36147	12.5	499	1.54	36.7	104	2.42	1.46	0.85	4.25	2.63	4	0.5	1.9	17.9	0.17	1.76	0.08	3.06	4	14.8	0.1	23	4.12	12	71.55	2.9	1	< 0.5	0.4	4.5	0.43	0.22	0.91	3	15	1.4	140	2.8	0.04	3.9	475	1.2	0.1	0.05	11.6	1.1	21.2
DKRC0050	44-45	07-36148	12.1	509	1.23	34.8	122	2.42	1.48	0.83	3.55	2.55	3	0.49	2.07	16.9	0.18	1.33	0.11	2.97	4	14.8	0.12	27	4.04	12	73.52	2.8	1	< 0.5	0.39	5.5	0.4	0.22	0.87	3	14	1.4	118	2.62	0.07	4.6	498	1.2	0.1	0.05	9.8	1.1	19.7
DKRC0050	46-47	07-36149	12.5	515	1.01	28.4	94	1.81	1.05	0.7	3.21	2.08	3	0.36	1.87	13.8	0.12	1.27	0.06	3.17	4	12.1	0.09	24	3.3	11	73.95	2.3	< 1	< 0.5	0.31	3.5	0.39	0.17	0.74	2	10	1.1	101	2.47	0.04	2	469	1.1	< 0.1	< 0.05	10	1.2	19.9
DKRC0050	48-49	07-36150	12	503	0.95	28.6	97	1.96	1.17	0.71	3.07	2.01	3	0.4	1.94	14	0.14	1.13	0.08	3.13	4	12.1	0.13	25	3.31	10	75.19	2.3	< 1	< 0.5	0.32	3.4	0.36	0.19	0.76	2	11	1.2	118	1.98	0.05	2.1	472	1.1	< 0.1	< 0.05	8.7	1.1	17.6
DKRC0050	49-50	07-36151	11.6	505	0.91	28.6	96	1.96	1.21	0.75	3.28	2.14	4	0.41	2	13.6	0.14	1.02	0.09	2.97	4	12.3	0.08	23	3.31	10	75.5	2.4	< 1	< 0.5	0.33	3.2	0.36	0.18	0.73	3	11	1.2	142	2.13	0.05	2.6	474	1.2	0.1	< 0.05	8.2	1	16.4
DKRC0050	50-51	07-36152	12.8	343	2.5	22	143	2.35	1.46	0.74	5.94	2.42	3	0.5	1.51	10.4	0.19	1.99	0.08	2.74	4	10.3	0.11	14	2.66	21	68.46	2.3	< 1	< 0.5	0.39	2.5	0.55	0.22	0.67	2	14	1.5	115	3.28	0.04	3.8	335	1	< 0.1	0.13	23.8	0.8	49.7
DKRC0050	51-52	07-36153	14.1	123	8.07	16.2	201	3.32	2.16	0.85	10.57	2.9	2	0.7	0.6	7.2	0.28	5.42	0.17	2.05	3	9.2	0.12	8	2.13	32	55.49	2.5	< 1	< 0.5	0.53	1.6	0.81	0.32	0.3	4	19	2.1	74	2.57	0.04	4.9	123	0.5	< 0.1	0.08	47.3	0.3	86.8
DKRC0050	52-53	07-36154	13.3	162	7.87	15.5	178	3.14	2.02	0.82	9.24	2.79	2	0.66	0.73	6.7	0.25	4.82	0.15	1.94	3	8.9	0.09	4	2.05	32	55.86	2.4	< 1	< 0.5	0.48	1.3	0.73	0.31	0.32	3	18	1.9	79	5.29	0.03	7.7	144	0.5	< 0.1	0.07	39.8	0.4	70.7
DKRC0050	56-57	07-36155	15.4	279	10.75	8.6	229	3.42	2.22	0.8	12.67	2.89	2	0.72	1.02	3.1	0.29	5.4	0.16	1.98	2	6.7	0.08	< 1	1.35	43	43.21	2.2	< 1	< 0.5	0.53	0.3	0.95	0.33	0.1	2	19	2.2	56	8.36	0.04	2.6	268	0.4	< 0.1	0.07	56.4	2.2	169.5
DKRC0050	63-64	07-36156	14.7	20	10.99	9.3	219	3.7	2.33	0.85	12.7	2.97	2	0.78	0.22	3.4	0.3	6.8	0.18	1.55	3	7.1	0.07	2	1.37	37	49.12	2.4	1	< 0.5	0.56	0.3	0.93	0.35	0.1	3	21	2.4	58	2.74	0.03	< 0.5	19.6	0.3	< 0.1	0.09	55	0.2	97
DKRC0050	74-75	07-36157	14.5	17	11.51	9.1	222	3.63	2.35	0.9	12.36	3	2	0.78	0.18	3.3	0.31	6.14	0.22	2.13	2	7.2	0.1	2	1.41	43	47.73	2.4	< 1	< 0.5	0.55	0.3	0.92	0.36	0.08	7	22	2.4	55	4.19	0.03	< 0.5	19.2	0.3	< 0.1	0.08	55.5	0.2	104.6
DKRC0061	0-1	07-36158	17.5	171	0.61	25.3	270	2	1.22	0.5	19.22	1.93	4	0.41	0.85	16	0.16	1.02	0.03	0.57	12	10.8	0.09	24	3.04	29	49.23	2.3	3	0.9	0.32	14.6	0.65	0.19	2.33	3	11	1.4	155	10.24	0.08	34	165	0.7	0.4	< 0.05	6	1.9	44.5
DKRC0061	2-3	07-36159	14.2	120	0.36	7.2	111	0.87	0.67	0.14	10.75	0.61	3	0.21	0.36	4.1	0.09	0.34	< 0.01	0.43	6	2.8	0.04	15	0.77	17	65.93	0.6	2	0.5	0.12	7	0.53	0.12	1.75	2	6	0.8	131	7.07	0.03	16	114	0.6	0.2	< 0.05	1.4	0.8	24.2
DKRC0061	4-5	07-36160	16.1	131	0.32	3.5	130	0.82	0.58	0.14	9.32	0.51	3	0.18	0.55	1.5	0.07	0.15	< 0.01	0.21	4	1.6	0.05	15	0.39	15	66.03	0.5	1	< 0.5	0.11	5.1	0.56	0.11	1.48	2	5	0.7	93	6.71	0.03	15.2	124	0.7	0.1	< 0.05	0.9	0.9	28.6
DKRC0061	6-7	07-36161	16.2	128	0.2	6.2	196	0.95	0.68	0.18	14.05	0.66	3	0.19	0.6	3.7	0.09	0.21	< 0.01	0.24	5	2.7	< 0.01	18	0.73	24	61.01	0.7	2	< 0.5	0.13	5.7	0.58	0.12	1.82	2	5	0.8	112	6.9	0.02	22.5	129	0.7	0.2	< 0.05	1.5	1	49.7
DKRC0061	8-9	07-36162	16.7	132	0.13	8.1	189	1	0.68	0.19	21.82	0.75	3	0.2	0.5	4.1	0.09	0.13	< 0.01	0.2	6	3.1	0.02	20	0.89	35	51.33	0.8	2	< 0.5	0.15	5.2	0.74	0.12	2.57	2	5	0.9	101	8.47	0.03	25.8	140	0.9	0.2	< 0.05	1.4	1	83.1
DKRC0061	10-11	07-36163	16.6	157	0.33	111	151	3.15	1.8	0.93	18.06	3.17	4	0.59	0.36	82.8	0.22	0.13	0.05	0.16	6	27.1	0.15	40	9.98	26	55.42	4.3	2	0.5	0.51	5.9	0.62	0.26	2.92	2	14	1.8	145	8.12	0.03	8.2	157	0.9	0.2	< 0.05	4.9	0.8	65
DKRC0061	12-13	07-36164	14.6	89	0.14	7.8	171	2.12	1.59	0.29	15.22	1.14	4	0.47	0.4	3.7	0.3	0.16	0.02	0.1	6	3	0.14	9	0.77	26	61.19	1	1	0.5	0.28	5.4	0.75	0.24	3.51	1	11	1.7	166	7.28	0.03	9.2	94.8	1.1	0.2	< 0.05	9.9	0.5	69.7
DKRC0061	14-15	07-36166	13.8	125	0.14	19.3	140	2.37	1.69	0.44	23.6	1.81	2	0.53	0.48	10.1	0.26	0.17	0.15	0.14	4	5.9	0.11	27	1.62	28	53.72	1.5	1	< 0.5	0.34	3.5	0.53	0.24	3.76	1	16	1.6	91	7.21	0.02	30.1	151	1.5	0.1	< 0.05	62.5	0.6	56.2
DKRC0061	16-17	07-36167	14	183	0.11	64.5	131	4.27	2.31	1.42	12.4	4.81	5	0.79	0.59	21.5	0.33	0.21	0.06	0.13	6	32.7	0.16	16	8.7	18	65.3	6.7	2	0.5	0.72	5.3	0.58	0.31	3.6	2	18	2.1	195	6.46	0.04	10.3	204	1.7	0.2	< 0.05	20	2	42.3
DKRC0061	18-19	07-36168	13.4	374	0.22	346	117	15.4	6.1	6.7	6.08	22.4	5	2.49	1.48	91	0.64	0.54	0.02	0.17	6	150	0.11	18	38	15	70.67	31.6	1	< 0.5	3.02	5.1	0.51	0.76	2.1	1	51	4.7	189	6.78	0.03	8	380	1.3	0.1	< 0.05	7.2	3.7	30
DKRC0061	20-21	07-36169	12.7	445	0.3	156	150	13.2	6.04	4.37	5.64	16.8	5	2.31	2.1	60.5	0.68	0.62	0.02	0.65	6	84	0.08	18	20.2	13	71.07	18.3	2	0.6	2.45	4.5	0.51	0.78	1.83	1	55	4.6	196	6.35	0.05	8.3	465	2.1	0.1	< 0.05	9.2	3.8	26.5
DKRC0061	22-23	07-36170	12.4	460	0.4	49.9	117	6.32	3.87	1.46	4.9	6.1	5	1.28	2.13	24.5	0.52	0.75	0.03	1.77	6	24.8	0.07	11	6.19	12	71.71	5.3	1	0.6	0.99	4.4	0.66	0.52	1.3	1	36	3.2	190	5.22	0.04	8.1	464	2.7	0.1	< 0.05	17.4	7.6	21.9
DKRC0061	24-25	07-36171	10.9	484	0.63	34.6	124	3.59	2.16	0.98	2.48	3.83	4	0.73	2.18	18.6	0.3	0.53	0.02	2.68	4	16.9	0.04	12	4.32	9	77.04	3.4	< 1	< 0.5	0.57	3.6	0.38	0.3	0.88	1	21	1.9	151	3.13	0.05	3.1	544	1.9	0.1	< 0.05	9.7	1.5	15.2
DKRC0061	26-27	07-36172	11	578	0.62	35	135	3.14	1.93	0.92	2.88	3.37	4	0.65	2.24	17.4	0.3	0.6	0.05	2.69	4	15.8	0.02	14	4.04	10	76.23	3.2	1	< 0.5	0.5	3.5	0.39	0.26	0.89	1	19	1.7	136	3.26	0.06	3.2	581	1.9	0.1	< 0.05	18	1.6	17.2
DKRC0061	28-29	07-36173	10.9	674	0.62	36.3	130	2.7	1.73	0.9	2.63	3	5	0.56	2.28	18	0.27	0.65	0.09	2.74	5	15.6	0.02	14	4.19	10	76.34	3	1	< 0.5	0.46	4.3	0.4	0.24	0.98	2	17	1.5	186	3.28	0.06	6.6	735	1.8	0.1	< 0.05	25	1.5	14.8
DKRC0061	30-31	07-36174	11.6	864	0.81	40.4	167	3.84	2.4	1.16	6.64	4.03	4	0.78	2.13	19.5	0.35	1.09	0.23	2.77	5	19.2	0.15	11	4.9	13	68.87	3.9	1	< 0.5	0.62	4	0.5	0.32	1.05	1	26	2	148	5.18	0.06	4.9	881	1.6	0.1	0.11	23.7	3.3	23.4
DKRC0061	32-33	07-36175	11.1	510	0.71	36.4	135	2.57	1.51	0.9	2.7	2.97	5	0.5	2.22	16.7	0.24	1.22	0.04	2.35	6	16	0.15	15	4.19	11	73.83	3.2	2	0.7	0.43	4.4	0.49	0.22	0.82	1	15	1.4	172	5.18	0.05	3.4	522	1	0.1	< 0.05	7	1.8	16.7
DKRC0061	34-35	07-36176	10.6	561	0.69	32.1	126	2.36	1.39	0.82	2.78	2.5	4	0.47	2.2	15	0.22	1.11	0.14	2.33	5	14	0.05	14	3.68	10	75.17	2.8	1	< 0.5	0.37	4	0.39	0.2	0.82	1	14	1.3	167	4.58	0.04	5.9	582	1.2	0.1	0.08	15.5	1.5	16.3
DKRC0061	36-37	07-36177	10.9	532	1	33.2	137	2.6	1.58	0.83	3.35	2.7	4	0.52	2.29	15.2	0.24	1.39	0.25	2.36	5	14.4	0.09	14	3.9	11	72.74	3	1	< 0.5	0.43	4.3	0.44	0.21	0.81	2	15	1.5	165	5.14	0.05	3.9	556	1.3	0.1	0.13	14.2	1.4	17.6
DKRC0061	38-39	07-36178	12	441	3.18	34.3	156	2.56	1.53	0.8	4.69	2.77	3	0.52	1.89	16.6	0.24	2.09	0.13	2.67	4	14.6	0.07	12	3.93	14	66.64	2.9	1	< 0.5	0.42	5.7	0.52	0.21	0.96	1	14	1.5	121	6.11	0.05	4.4	453	1.2	0.1	0.07	16.6	1.7	31.9
DKRC0061	40-41	07-36179	12.6	450	3.94	32.6	222	3	1.87	0.95	6.26	3.04	3	0.61	1.64	15.2	0.3	3.57	0.15	2.62	5	14.7	0.07	10	3.83	21	62.64	3.3	1	< 0.5	0.49	4.7	0.62	0.25	0.92	1	17	1.7	123	5.94	0.05	5.8	405	1.1	0.1	0.08	32.5	1.5	61.4
DKRC0061	42-43	07-36180	12.3	355	5.46	29.8	175	2.72	1.66	0.86	6.26	2.85	3	0.56	1.69	13.8	0.25	2.92	0.15	2.57	4	13.5	0.12	10	3.49	22	61.15	2.9	1	< 0.5	0.45	4.3	0.58	0.23	1.09	1	15	1.5	98	6.82	0.06	6.7	364	1	0.1	0.06	31.8	1.5	58
DKRC0061	44-45	07-36181	13.1	396	4.92	34.3	196	2.98	1.77	0.94	7.22	3.02	3	0.59	1.71	15.8	0.27	3.55	0.12	2.58	5	15.5	0.21	9	4.03	20	60.24	3.3	1	< 0.5	0.48	4.1	0.68	0.25	0.91	2	16	1.7	110	5.69	0.08	13	390	1.1	0.1	0.08	33.9	1.9	72.2
DKRC0061	46-47	07-36182	12.2	508	4.69	37.6	230	2.4	1.39	0.83	4.16	2.81	3	0.47	2	17.7	0.21	2.69	0.11	3.14	5	15.9	0.12	11	4.31	13	65.03	3.1	1	0.6	0.39	5.1	0.48	0.2	1.15	3	13	1.2	129	5.34	0.05	3.2	470	1.1	0.1	0.06	16.9	1.8	29.4
DKRC0061	47-48	07-36183	12	296	6.76	32.1	202	3.7	2.22	1.02	7.74	3.49	3	0.74	1.3	14.4	0.32	4.26	0.14	2.49	5	15.3	0.16	9	3.85	24	56.16	3.4	1	< 0.5	0.59	3.9	0.77	0.32	1.42	3	21	2	116	8.28	0.06	5.6	278	0.9	< 0.1	0.07	32.7	2.2	74
DKRC0061	48-49	07-36184	11.2	167	8.16	19	340	4.35	2.88	1.1	11.96	3.81	3	0.91	0.74	8.1	0.43	6.52	0.19	2.07	4	11.3	0.09	6	2.54	34	49.52	3.3	< 1	< 0.5	0.68	1.8	1.05	0.4	0.84	< 1	23	2.6	90	8.54	0.08	12.9	152	0.6	< 0.1	0.1	51	2.8	145.2
DKRC0061	50-51	07-36185	10.9	212	9.45	28.1	262	4.34	2.79	1.17	11.37	4.08	3	0.89	0.94	12.1	0.44	5.95	0.18	1.91	5	15.2	0.12	4	3.65	34	47.93	3.8	< 1	< 0.5	0.68	2	1.04	0.4	0.87	1	23	2.7	92	10.17	0.07	10	198	0.6	< 0.1	0.11	48.5	3.8	119.3
DKRC0055	0-1m	07-36187	9.2	436	0.31	25.9	153	2.02	1.36	0.56	7.45	2.09	6	0.42	1.36	12.1	0.22	0.2	0.04	1.23	6	10.8	0.04	14	2.88	8	75.95	2.2	1	0.5	0.33	9.5	0.44	0.19	1.33	< 1	11	1.3	214	3.78	0.05	10.4	405	0.9	0.3	0.05	6.9	1.7	22.8
DKRC0055	2-3	07-36188	11.1	642	7.47	33.9	132	1.84	1.21	0.52	6.42	1.88	4	0.38	1.32	20.9	0.19	1	0.03	0.24	6	12.3	< 0.01	10	3.81	11	58.33	2.3	1	< 0.5	0.29	7.1	0.41	0.16	1.41	1	10	1.2	137	13.68	0.04	11	611	0.9	0.2	< 0.05	7.2	4	29.5
DKRC0055	4-5	07-36189	12.6	527	0.63	47.6	148	3.8	1.72	1.42	4.96	5.03	4	0.64	2.21	19.4	0.23	0.84	0.03	0.42	5	31.3	0.04	10	7.88	11	70.79	6.7	< 1	< 0.5	0.7	5.5	0.49	0.23	1.16	1	14	1.5	168	6.99	0.05	8.6	519	0.7	0.1	< 0.05	8.3	3.7	27.7
DKRC0055	6-7	07-36190	11.5	545	0.69	57.8	122	6.43	2.77	2.32	7.07	8.71	4	1.09	2.38	26.7	0.32	0.86	0.03	0.84	5	48.2	0.12	11	11.6	11	69.32	10.5	< 1	< 0.5	1.24	4.5	0.43	0.37	1.31	4	23	2.3	152	6.78	0.04	12.7	517	1	0.1	< 0.05	12.6	4.9	33.7
DKRC0055	8-9	07-36191	14	571	0.33	97.4	144	9.88	5.42	3.02	5.18	12.2	5	1.88	2.51	49.1	0.75	1.35	0.02	0.46	8	69.1	0.1	15	17.3	22	67.05	14.7	1	0.7	1.81	8	0.58	0.75	1.38	2	47	5	203	8.45	0.09	6.5	526	1.4	0.2	< 0.05	13.2	5.6	39.1
DKRC0055	10-11	07-36192	18	501	0.29	56.8	166	7.91	4.5	2.1	8.27	8.66	4	1.53	2.06	24.6	0.64	1.37	0.04	1.19	6	38.6	0.12	13	9.07	24	59.57	8.6	1	< 0.5	1.34	4.3	0.78	0.63	1.5	2	38	4.3	143	8.28	0.04	5.8	508	1.6	0.1	< 0.05	18.5	4	80.2
DKRC0055	12-13	07-36193	12.9	616	0.53	90.7	107	8.89	5.47	2.48	5.35	10.3	4	1.83	2.22	35.7	0.8	1.1	0.08	2.57	6	47.3	0.03	13	11.5	13	69.11	10	< 1	< 0.5	1.54	4.5	0.48	0.76	1.4	2	52	5	160	5.64	0.05	2.9	623	1.9	0.2	< 0.05	16.5	3.8	34
DKRC0055	14-15	07-36194	11.7	3190	0.67	134	117	49.7	45.3	4.82	4.64	29.3	4	13.4	2.04	42.8	6.32	1.13	1.38	2.92	5	61.3	0.04	11	13.4	11	69.84	15.7	< 1	< 0.5	6.21	3.7	0.43	6.29	1.86	2	633	38.5	164	5.18	0.07	4.2	2590	4.4	0.1	0.1	211	2.4	65.4
DKRC0055	16-17	07-36195	12.8	687	0.9	48.1	88	3.15	2.11	1.12	3.16	3.67	4	0.67	2.25	23.6	0.28	1.07	0.06	3.78	6	21.6	0.06	16	5.92	9	71.1	4.1	1	< 0.5	0.51	5.3	0.4	0.29	1.38	2	21	1.7	153	4.4	0.06	1.6	762	3	0.3	< 0.05	14.8	1.6	22.9
DKRC0055	18-19	07-36196	11.7	608	0.89	41.9	105	3.15	1.9	1.01	7.18	3.1	4	0.63	2.14	16.9	0.28	1.56	0.22	2.64	6	16.9	0.13	12	4.48	11	67.24	3.5	< 1	< 0.5	0.5	3.8	0.49	0.27	1.08	1	17	1.8	158	5.85	0.05	3.7	555	1.8	0.1	0.11	26.5	1.3	24.8
DKRC0055	20-21	07-36197	12.4	516	0.98	36.4	125	2.47	1.48	0.97	3.88	2.81	5	0.5	2.09	17.6	0.22	1.74	0.07	3.08	5	16.7	0.13	11	4.43	14	70.34	3.3	< 1	< 0.5	0.41	3.6	0.47	0.21	0.83	1	13	1.4	192	4.77	0.05	2.6	464	1.2	0.1	0.08	12.2	1.3	25.1
DKRC0055	22-23	07-36198	11	519	0.78	33.5	109	2.49	1.51	0.84	4.05	2.6	5	0.5	2.22	15.7	0.22	0.91	0.21	2.74	5	15	0.09	13	4.03	10	73.01	3	< 1	< 0.5	0.39	4.2	0.41	0.2	1.34	2	13	1.4	174	4.62	0.04	3.2	515	1.2	0.1	0.11	12.9	1	17.6
DKRC0055	24-25	07-36199	11.5	550	0.85	34.9	105	2.41	1.43	0.85	2.51	2.65	4	0.47	2.29	16.2	0.23	0.88	0.14	3.1	5	14.7	0.06	14	4.01	9	74.19	2.9	< 1	< 0.5	0.4	4.1	0.4	0.21	1.05	2	13	1.4	162	4.05	0.05	3.1	521	1.2	0.1	0.07	12.4	1.2	19.1
DKRC0055	26-27	07-36200	11.5	576	0.82	36.8	103	2.44	1.46	0.91	2.39	2.65	4	0.49	2.33	17.1	0.23	0.76	0.04	3.16	5	15.6	0.12	14	4.23	10	75.14	3	< 1	< 0.5	0.4	4.6	0.39	0.2	0.91	2	13	1.4	162	3.4	0.04	3	513	1.3	0.1	< 0.05	10.4	1.3	18.7
DKRC0055	28-29	07-36201	11.7	538	0.85	31.7	105	2.16	1.27	0.84	2.24	2.45	4	0.43	2.26	15	0.19	0.68	0.02	3.36	4	14.1	0.02	12	3.77	9	75.51	2.8	< 1	< 0.5	0.36	3.6	0.38	0.17	0.82	2	11	1.2	139	3.01	0.04	2.5	508	1.3	< 0.1	< 0.05	7.2	1.2	16.4
DKRC0055	30-31	07-36202	11.6	551	0.83	35.5	99	2.67	1.61	0.94	2.32	2.81	4	0.55	2.2	16.9	0.24	0.71	0.02	3.33	5	15.8	0.07	13	4.17	10	75.58	3.2	< 1	< 0.5	0.45	4.1	0.39	0.23	0.82	3	15	1.5	158	2.94	0.05	2.3	504	1.3	< 0.1	< 0.05	7.1	1.2	17.9
DKRC0055	32-33	07-36203	11.7	533	0.78	35.2	91	2.62	1.58	0.93	1.86	2.8	5	0.53	2.35	16.4	0.23	0.64	0.01	3.29	5	15.3	0.09	13	4.12	11	75.6	3.2	< 1	< 0.5	0.44	4.2	0.4	0.22	0.9	2	15	1.5	185	3.27	0.06	2.1	513	1.3	0.1	< 0.05	9.1	1.4	17.2
DKRC0055	34-35	07-36204	12.1	505	0.7	29.4	153	2.17	1.24	0.8	2.28	2.44	3	0.44	2.19	14.4	0.18	0.4	0.05	3.05	5	12.5	0.04	12	3.51	11	75.83	2.6	< 1	< 0.5	0.39	3.8	0.46	0.18	1.05	2	11	1.2	133	2.94	0.21	4.6	509	1.1	0.1	< 0.05	16	1.3	16
DKRC0055	36-37	07-36205	17.6	22	5.5	9.9	316	4.16	2.75	1.02	11.8	3.27	2	0.91	0.11	3.4	0.4	3.72	0.1	0.52	3	6.8	0.19	< 1	1.45	48	50.8	2.5	< 1	< 0.5	0.67	0.4	1.08	0.41	0.71	2	22	2.5	66	8.63	0.04	28.4	21.9	0.3	< 0.1	0.19	55	< 0.1	247.8
DKRC0055	37-38	07-36206	17	40	3.51	10.2	303	4.2	2.66	0.94	10.44	3.31	2	0.91	0.17	3.9	0.38	3.98	0.09	1.78	3	7.5	0.08	1	1.6	45	53.87	2.5	< 1	< 0.5	0.67	0.5	1.04	0.41	0.57	< 1	22	2.5	65	8.09	0.08	13	38.3	0.4	< 0.1	0.16	56.4	0.1	145.9
DKRC0055	38-39	07-36208	14.6	42	6.69	10.3	251	3.1	1.87	0.87	11.5	2.83	2	0.66	0.19	4	0.28	5.36	0.11	1.98	2	7.5	0.14	2	1.59	42	49.17	2.4	< 1	< 0.5	0.53	0.4	0.88	0.28	0.66	< 1	16	1.8	60	9.37	0.05	2	39.2	0.4	< 0.1	0.22	73.1	0.1	103.5
DKRC0055	44-45	07-36209	8.63	207	10.24	13.7	129	2.34	1.51	0.86	20.12	2.18	1	0.52	1.09	5.8	0.23	5.43	0.16	0.45	2	7.2	0.14	12	1.8	16	45.37	1.9	6	< 0.5	0.39	0.9	0.44	0.23	0.32	14	14	1.4	51	7.93	9	1700	190	1.1	0.6	1.77	66.1	2	458.7
DKRC0055	51-52	07-36210	12.8	51	10.38	7.4	265	2.99	1.93	0.7	10.39	2.38	1	0.65	0.23	2.8	0.29	5.74	0.17	1.82	2	5.5	0.08	1	1.17	35	47.36	1.8	< 1	< 0.5	0.46	0.3	0.78	0.29	0.08	2	17	1.8	49	10.27	0.06	< 0.5	44.4	0.3	< 0.1	0.06	55.6	0.3	104.6
DKRC0055	58-59	07-36211	13.8	78	9.26	8.3	263	3.21	2.15	0.77	10.92	2.59	1	0.72	0.32	3	0.32	7.17	0.14	1.91	2	6	0.02	2	1.3	39	45.26	2	< 1	< 0.5	0.53	0.3	0.82	0.32	0.08	3	18	2	53	10.4	0.16	32.6	69.1	0.5	< 0.1	0.07	50.8	0.5	98
		Al2O3	Ba	CaO	Ce	Cr	Dy	Er	Eu	Fe2O3	Gd	Hf	Ho	K2O	La	Lu	MgO	MnO	Na2O	Nb	Nd	P2O5	Pb	Pr	Sc	SiO2	Sm	Ta	Tb	Th	TiO2	Tm	U	W	Y	Yb	Zr	LOI	Ag	As	Be	Bi	Cd	Co	Cs	Cu	Ga	Ge	Hg
	Al2O3	1
	Ba	-0.214325	1
	CaO	-0.0318423	-0.360066	1
	Ce	0.0680641	0.355921	-0.329549	1
	Cr	0.388739	-0.396866	0.575058	-0.251586	1
	Dy	-0.00681501	0.700677	-0.120346	0.48255	-0.0365027	1
	Er	-0.0256917	0.742885	-0.0926614	0.336707	-0.0328045	0.978566	1
	Eu	-0.0124986	0.425469	-0.182817	0.846912	-0.105708	0.76305	0.619456	1
	Fe2O3	0.466276	-0.4406	0.326187	-0.165424	0.498636	-0.0799946	-0.0654228	-0.16469	1
	Gd	0.0108825	0.584733	-0.196789	0.743946	-0.0871534	0.914426	0.814771	0.95398	-0.138518	1
	Hf	-0.245625	0.390453	-0.705789	0.443904	-0.51064	0.142885	0.0859917	0.313118	-0.459342	0.280216	1
	Ho	-0.0205049	0.731273	-0.0998397	0.381508	-0.0332216	0.989573	0.997928	0.665994	-0.0710178	0.848766	0.0993652	1
	K2O	-0.343158	0.555769	-0.53523	0.336112	-0.571105	0.104805	0.076649	0.214063	-0.739149	0.208225	0.604801	0.0841213	1
	La	0.136376	0.365664	-0.390138	0.911921	-0.287786	0.36445	0.244027	0.66955	-0.146146	0.598299	0.484877	0.279898	0.406222	1
	Lu	-0.0280503	0.746898	-0.0883721	0.307829	-0.0242314	0.969939	0.998535	0.589929	-0.0618641	0.793362	0.0789778	0.994127	0.0783088	0.222871	1
	MgO	0.0378636	-0.342723	0.925445	-0.305814	0.680321	-0.0674856	-0.0486906	-0.122366	0.300212	-0.134783	-0.70928	-0.0527541	-0.49205	-0.375916	-0.0433299	1
	MnO	-0.168679	0.711725	0.129602	0.0799433	0.0486287	0.766055	0.841113	0.338337	-0.0170509	0.531399	-0.0732874	0.820984	-0.011571	-0.00368733	0.845986	0.166195	1
	Na2O	-0.515932	0.214249	0.0550077	-0.282892	-0.254801	-0.00905054	0.0518373	-0.136329	-0.636828	-0.121336	0.000327624	0.0357849	0.309615	-0.324882	0.0552953	0.0899493	0.220481	1
	Nb	0.295686	0.273667	-0.492806	0.458107	-0.149824	0.0423009	0.00629403	0.147849	-0.0504091	0.160774	0.513463	0.013906	0.507807	0.598252	0.012624	-0.452753	-0.180734	-0.43507	1
	Nd	0.0481674	0.34617	-0.309865	0.95854	-0.212372	0.554142	0.389928	0.931243	-0.184604	0.831348	0.439557	0.440825	0.334109	0.837869	0.359471	-0.266656	0.0922077	-0.276844	0.38307	1
	P2O5	0.0724771	-0.160951	0.104275	0.0777042	0.116803	0.0179671	-0.0160598	0.0979916	0.0875622	0.0529906	-0.070082	-0.00453715	-0.0454262	0.0854674	-0.0191047	0.165573	0.00706602	0.0618795	-0.0116751	0.0817613	1
	Pb	0.0681319	0.156186	-0.603073	0.333554	-0.516985	-0.0977528	-0.108216	0.00875519	-0.0355182	-0.0181505	0.389594	-0.107432	0.353825	0.501958	-0.119816	-0.627909	-0.172279	-0.0966998	0.478197	0.204737	0.0526491	1
	Pr	0.0666061	0.325324	-0.332981	0.977272	-0.24003	0.486439	0.323864	0.885452	-0.182823	0.774909	0.460051	0.373751	0.355892	0.888896	0.294042	-0.29795	0.0318293	-0.303436	0.442735	0.99214	0.0857409	0.274044	1
	Sc	0.553598	-0.496196	0.633186	-0.270514	0.827326	-0.0502572	-0.0445017	-0.121643	0.68809	-0.11218	-0.641924	-0.0457507	-0.769916	-0.312999	-0.0406808	0.703947	0.0268905	-0.332532	-0.300386	-0.233182	0.109106	-0.497737	-0.259268	1
	SiO2	-0.492644	0.406469	-0.727142	0.196298	-0.743678	0.0633433	0.0494145	0.14517	-0.796762	0.123421	0.680302	0.0536597	0.686582	0.18423	0.0415458	-0.72303	-0.0561868	0.46363	0.113396	0.199227	-0.135198	0.369419	0.203659	-0.860524	1
	Sm	0.0456288	0.358238	-0.255509	0.917266	-0.144511	0.645465	0.484129	0.97392	-0.150656	0.894068	0.384565	0.534895	0.264422	0.763653	0.453628	-0.203091	0.185449	-0.254767	0.289682	0.985962	0.0919439	0.108153	0.959338	-0.161764	0.15665	1
	Ta	0.338618	0.114406	-0.197611	0.314558	0.0903395	-0.0208467	-0.0446354	0.0569437	0.0177581	0.070467	0.219178	-0.039516	0.392306	0.438786	-0.0369043	-0.123268	-0.186253	-0.411395	0.845179	0.250583	0.0373204	0.321331	0.301286	-0.0635385	-0.099704	0.173676	1
	Tb	0.00909673	0.647104	-0.144905	0.600267	-0.0428097	0.982882	0.924397	0.86543	-0.0959362	0.972073	0.192656	0.946523	0.13565	0.465486	0.909817	-0.0845484	0.673284	-0.0635844	0.0814693	0.685336	0.0412816	-0.0794543	0.619379	-0.0588232	0.0770794	0.76922	0.00936456	1
	Th	0.238907	0.259147	-0.443485	0.385524	-0.204723	-0.0383492	-0.0560028	0.0425966	-0.079969	0.0588727	0.458387	-0.053284	0.496466	0.535882	-0.0500648	-0.460417	-0.201563	-0.390383	0.919447	0.293774	-0.0369462	0.536474	0.359382	-0.359012	0.137529	0.190952	0.771785	-0.0117203	1
	TiO2	0.558863	-0.395973	0.593778	-0.168526	0.843506	-0.0157707	-0.0251111	-0.0558235	0.568574	-0.0465744	-0.508731	-0.0229212	-0.617852	-0.192238	-0.0181621	0.698526	0.0176458	-0.373833	-0.111737	-0.136041	0.152661	-0.531138	-0.155403	0.908366	-0.824454	-0.0794112	0.0704023	-0.0125916	-0.204311	1
	Tm	-0.0129685	0.734803	-0.0891764	0.318712	-0.0259025	0.975354	0.998702	0.605375	-0.059177	0.805162	0.0721033	0.996168	0.0728491	0.229595	0.998211	-0.0437822	0.837532	0.0525438	0.0059936	0.373443	-0.00479417	-0.111927	0.306709	-0.0364578	0.0403947	0.46996	-0.0423803	0.919098	-0.0541282	-0.0169707	1
	U	0.30091	0.115493	-0.552646	0.343624	-0.179134	0.208796	0.177917	0.205154	0.359504	0.246429	0.389877	0.184843	-0.000753503	0.392842	0.177507	-0.599785	-0.0122823	-0.512591	0.489188	0.303146	0.0933901	0.47916	0.325307	-0.13558	0.0451563	0.283578	0.18678	0.225773	0.44825	-0.1166	0.180935	1
	W	-0.12543	-0.137173	0.410559	-0.159964	-0.00363974	-0.0493188	-0.0300813	-0.0807441	0.303261	-0.0898845	-0.383686	-0.033876	-0.1535	-0.174871	-0.0322644	0.349638	0.065643	-0.0501758	-0.216125	-0.135958	0.124428	-0.038161	-0.14558	0.110841	-0.307008	-0.117354	-0.0270819	-0.0632593	-0.148929	0.00375053	-0.0247046	-0.250227	1
	Y	-0.0443118	0.759534	-0.0939113	0.292663	-0.051714	0.959984	0.996383	0.565307	-0.0736131	0.772176	0.071763	0.989866	0.0793887	0.207919	0.996541	-0.0577392	0.857852	0.0812051	-0.00228728	0.334722	-0.0309418	-0.0926804	0.27124	-0.0658313	0.0629901	0.426306	-0.0502158	0.893362	-0.0516521	-0.0544673	0.995147	0.164548	-0.0221739	1
	Yb	-0.00618078	0.731006	-0.0901591	0.319076	-0.0254107	0.9749	0.997764	0.60488	-0.0554678	0.805144	0.0734987	0.9953	0.0745849	0.231927	0.997884	-0.0444256	0.832081	0.0475847	0.0140507	0.374763	-0.00168774	-0.111488	0.308309	-0.0335666	0.0363928	0.471133	-0.0360767	0.918983	-0.0478261	-0.0128455	0.999635	0.186228	-0.0265712	0.993589	1
	Zr	-0.28184	0.414218	-0.744914	0.450892	-0.551633	0.18672	0.129525	0.34665	-0.478738	0.320161	0.953609	0.143703	0.639691	0.481359	0.122985	-0.743067	-0.0380202	0.0273749	0.515908	0.458374	-0.0535521	0.408328	0.473866	-0.700066	0.724255	0.409472	0.206572	0.236116	0.457004	-0.593698	0.115825	0.435932	-0.34527	0.116698	0.116745	1
	LOI	0.451074	-0.0736263	0.21134	0.190951	0.463006	0.0441463	0.0132664	0.0774081	0.488005	0.0974516	-0.16784	0.0216464	-0.220978	0.271094	0.0241527	0.193986	-0.0749618	-0.721581	0.426548	0.175165	-0.0205113	-0.133332	0.201409	0.414745	-0.650857	0.157813	0.443692	0.0734699	0.375581	0.514205	0.0168594	0.278436	-0.0595021	-0.00995933	0.0222586	-0.206795	1
	Ag	-0.259203	-0.0746014	0.270694	-0.0751401	-0.0444906	-0.0342292	-0.0248617	-0.0321193	0.298982	-0.0503072	-0.280306	-0.0258168	-0.0755256	-0.0928831	-0.0217006	0.222229	0.0338315	-0.143962	-0.157072	-0.0718773	0.105792	-0.0324154	-0.075174	-0.0209813	-0.237502	-0.0624714	-0.0301599	-0.0386371	-0.121207	-0.0767541	-0.0235124	-0.143709	0.819165	-0.0206668	-0.0266046	-0.230041	0.0820135	1
	As	-0.239983	-0.0859567	0.267613	-0.0792258	-0.0355115	-0.0391356	-0.0297432	-0.0377838	0.328667	-0.0557169	-0.286489	-0.0307633	-0.100424	-0.0972267	-0.0267908	0.217541	0.0279376	-0.170469	-0.156792	-0.0761789	0.101348	-0.0297348	-0.0793739	-0.00467348	-0.254559	-0.0663483	-0.0349597	-0.0436241	-0.120526	-0.0641461	-0.0284194	-0.125368	0.817159	-0.0257049	-0.0315964	-0.238663	0.099313	0.998859	1
	Be	-0.178072	0.676052	-0.483891	0.349618	-0.367719	0.591486	0.582086	0.44902	-0.355513	0.56383	0.455853	0.587875	0.521979	0.354793	0.578833	-0.442818	0.448868	0.189272	0.263919	0.369466	0.0525177	0.225695	0.3417	-0.509449	0.44989	0.393925	0.082623	0.58186	0.219761	-0.411178	0.582833	0.331863	-0.155481	0.577781	0.579287	0.526033	-0.148851	-0.0276383	-0.0390459	1
	Bi	0.167506	0.0951726	-0.124092	0.164059	-0.0784402	-0.00429602	-0.00387841	-0.018668	0.227402	0.0161172	0.0770904	-0.00376393	0.204243	0.272069	0.00687261	-0.135371	-0.127339	-0.411105	0.561228	0.111494	0.0211527	0.269676	0.14991	-0.13186	-0.168726	0.063592	0.556283	0.000773883	0.586812	-0.0397328	0.0132311	0.286774	0.348327	-0.00248487	0.019978	0.0776415	0.412263	0.435973	0.438385	0.184087	1
	Cd	-0.230703	-0.0821524	0.314851	-0.10916	0.0310788	-0.0257397	-0.0122206	-0.0401116	0.321304	-0.0554553	-0.330104	-0.013882	-0.143303	-0.132519	-0.00824928	0.288317	0.0756137	-0.137078	-0.215009	-0.10298	0.137337	-0.114911	-0.110355	0.0615799	-0.288845	-0.0845254	-0.0778821	-0.0342564	-0.187346	0.0100182	-0.0111366	-0.191843	0.790015	-0.00805131	-0.0149964	-0.292252	0.109586	0.982148	0.983207	-0.0497849	0.40041	1
	Co	-0.0122993	0.416245	0.388778	-0.0299177	0.348008	0.722149	0.777297	0.321399	0.226682	0.498163	-0.380437	0.765677	-0.297784	-0.137523	0.784045	0.450387	0.844706	0.0814375	-0.347528	0.0253764	0.0977992	-0.436198	-0.0489889	0.382615	-0.37108	0.150521	-0.224274	0.64554	-0.386482	0.341094	0.781809	-0.089558	0.165205	0.778709	0.778282	-0.347956	0.0923554	0.16426	0.162671	0.300768	-0.102165	0.234954	1
	Cs	0.156045	0.328257	-0.267682	0.505864	-0.103511	0.191948	0.121485	0.329019	-0.13138	0.340624	0.373102	0.141135	0.560949	0.601883	0.124067	-0.220398	-0.101329	-0.426605	0.768152	0.502061	-0.0215009	0.203479	0.534398	-0.239729	0.030525	0.438616	0.710633	0.253537	0.695258	0.0188978	0.123788	0.262844	-0.107104	0.0920946	0.130749	0.337195	0.496165	-0.0108798	-0.0156841	0.315092	0.504209	-0.0591712	-0.151881	1
	Cu	0.109441	-0.268104	0.611861	-0.2033	0.498554	0.0336162	0.0466188	-0.0399439	0.593374	-0.0340824	-0.590267	0.0446069	-0.502003	-0.252864	0.0528361	0.613156	0.13412	-0.27869	-0.340815	-0.171473	0.198747	-0.393698	-0.197117	0.582473	-0.692787	-0.109541	-0.123481	0.0196643	-0.354954	0.531825	0.0525848	-0.217246	0.653789	0.0342113	0.0510151	-0.601204	0.325128	0.746534	0.755897	-0.273943	0.231013	0.797709	0.44829	-0.130541	1
	Ga	0.75191	-0.0258825	-0.150719	0.320012	0.306446	0.0368794	-0.00550476	0.123641	0.334453	0.129099	0.0390361	0.00548396	-0.0125912	0.421142	0.00179878	-0.0669713	-0.215371	-0.61651	0.668802	0.277347	0.0819455	0.151894	0.318071	0.302426	-0.377175	0.226016	0.647413	0.0772662	0.590908	0.458603	-0.00321691	0.384533	-0.121104	-0.0303624	0.00550251	-0.00727602	0.628715	-0.113741	-0.100062	-0.0273209	0.440828	-0.100891	-0.100449	0.566978	0.104935	1
	Ge	0.310664	0.298962	-0.109717	0.388907	0.217444	0.346298	0.301882	0.371925	0.137408	0.411495	0.123226	0.314415	0.201288	0.409789	0.309077	0.037868	0.196489	-0.365855	0.552667	0.412538	0.0252241	-0.000865472	0.412086	0.140553	-0.228019	0.403562	0.488906	0.380209	0.392178	0.325461	0.297322	0.204134	-0.116778	0.271641	0.304101	0.110021	0.47917	-0.0938629	-0.0851586	0.191643	0.25328	-0.0787169	0.19182	0.604714	0.0743081	0.648254	1
	Hg	-0.0882443	-0.135389	0.286889	-0.111157	0.120421	-0.0333441	-0.0241546	-0.0373237	0.31807	-0.0589309	-0.326989	-0.0248644	-0.182875	-0.140957	-0.0204598	0.246432	0.0239957	-0.197279	-0.201222	-0.103102	0.209403	-0.131873	-0.110685	0.149749	-0.291917	-0.0809436	-0.0557269	-0.0373407	-0.183796	0.0926974	-0.0220261	-0.16269	0.704654	-0.0256257	-0.0264329	-0.295272	0.120082	0.854604	0.861435	-0.1041	0.337446	0.877204	0.200378	-0.075405	0.829995	0.00584672	0.0130573	1
	In	-0.121981	-0.159303	0.363066	-0.10923	0.115762	-0.0462097	-0.035439	-0.0601738	0.464223	-0.0721725	-0.375161	-0.0370911	-0.220782	-0.124415	-0.0310867	0.325796	0.0326802	-0.258492	-0.154879	-0.106397	0.115268	-0.0949955	-0.110856	0.16518	-0.415158	-0.0884811	-0.000812306	-0.0524545	-0.133024	0.104733	-0.0327727	-0.117658	0.818767	-0.0352472	-0.0349124	-0.341854	0.200032	0.978307	0.98239	-0.119938	0.445854	0.973332	0.219998	-0.0149596	0.841299	-0.00380809	-0.024728	0.863466
	Li	0.0728301	-0.0442195	0.465536	-0.0945878	0.353814	0.0407165	0.0525875	-0.00966597	-0.00267835	-0.00461448	-0.416616	0.0520559	-0.127911	-0.0999045	0.0590587	0.530324	0.139767	0.273163	-0.161224	-0.0910943	0.346228	-0.219767	-0.101044	0.24158	-0.368291	-0.0642996	-0.0848882	0.0281149	-0.100333	0.31494	0.0649281	-0.231374	0.0203874	0.0538202	0.0650215	-0.386506	0.190112	0.0230383	0.0185063	-0.0212839	0.00671492	0.0697151	0.288265	-0.0721609	0.229216	0.0935441	0.107078	0.0390232
	Mn	-0.178984	0.709753	0.125345	0.080537	0.0439993	0.767147	0.838682	0.344165	-0.0256767	0.535528	-0.0608116	0.819408	0.00390647	-0.00416465	0.844404	0.162665	0.994366	0.227525	-0.17596	0.0981157	0.00106136	-0.182997	0.0363165	0.0227995	-0.0508992	0.193257	-0.192619	0.676605	-0.198076	0.0170101	0.837452	0.00102221	0.049797	0.853181	0.832915	-0.0283412	-0.0702579	0.0166346	0.0104089	0.450204	-0.113055	0.0566604	0.838283	-0.0853241	0.119404	-0.222407	0.206165	0.00401439
	Mo	0.188454	0.242954	-0.0497488	0.0596627	-0.0736325	0.282334	0.318676	0.0796337	0.476665	0.185129	-0.166222	0.309883	-0.112266	0.0863714	0.321595	-0.10112	0.331271	-0.334547	0.185521	0.0524593	0.13832	0.22153	0.0473741	0.00349813	-0.280162	0.0687213	0.0610699	0.242553	0.226825	-0.0298924	0.3263	0.398815	0.420847	0.332499	0.32575	-0.111522	0.261182	0.451011	0.468205	0.261483	0.503163	0.457481	0.322416	0.115627	0.37363	0.254958	0.276602	0.422832
	Ni	0.169618	-0.0990526	0.542768	-0.19495	0.64826	0.280782	0.293658	0.110547	0.340265	0.171472	-0.538229	0.294314	-0.501476	-0.290898	0.297789	0.658436	0.416564	0.0189249	-0.451189	-0.120387	0.296222	-0.594805	-0.178891	0.675817	-0.565398	-0.0118799	-0.243796	0.255684	-0.509943	0.630453	0.301024	-0.211597	0.0425782	0.276822	0.29783	-0.52892	0.195243	0.0186388	0.0227859	0.0163905	-0.218888	0.133102	0.742585	-0.249924	0.502104	0.0040316	0.152393	0.186162
	P	-0.059509	0.0697206	0.16351	-0.0265228	0.080977	0.0569963	0.0711449	-0.00407588	0.047302	0.00217561	-0.126536	0.0673771	0.00482027	-0.00534213	0.0783588	0.240041	0.272015	0.254209	-0.0927403	-0.05797	0.558747	0.0363474	-0.0579243	0.0895216	-0.164309	-0.0403341	-0.109155	0.0385464	-0.0794277	0.128323	0.0843049	0.0788323	-0.0697024	0.0698623	0.0852636	-0.114884	0.0209979	-0.0573939	-0.0595892	0.136061	-0.00416393	-0.0088352	0.286071	-0.0655667	0.0797283	-0.0397715	0.120978	0.00851339
	Rb	-0.0401407	0.550441	-0.492236	0.444386	-0.382105	0.314395	0.266875	0.351504	-0.459581	0.403054	0.530835	0.281168	0.798189	0.523875	0.270915	-0.429389	0.0536296	-0.0310129	0.64157	0.456572	-0.00328816	0.248237	0.470224	-0.523586	0.408213	0.411766	0.511684	0.350385	0.582559	-0.308889	0.274692	0.216675	-0.184799	0.247482	0.280688	0.537117	0.106485	-0.100641	-0.115684	0.591635	0.372734	-0.157926	-0.109024	0.848279	-0.357519	0.282011	0.453343	-0.171755
	S	-0.209262	-0.122146	0.331657	-0.108442	0.032068	-0.0541296	-0.0418604	-0.0590232	0.354338	-0.0769172	-0.336083	-0.0434598	-0.14305	-0.131138	-0.0381797	0.290913	0.0295409	-0.153659	-0.177509	-0.104614	0.132034	-0.0781892	-0.109874	0.0667862	-0.319261	-0.0907824	-0.023898	-0.0606849	-0.135446	-0.00578991	-0.0401202	-0.166238	0.804255	-0.0370675	-0.0429669	-0.297228	0.128853	0.981595	0.981621	-0.0870684	0.423724	0.978134	0.197366	-0.0407108	0.776126	-0.0896933	-0.126521	0.835635
	Sb	0.087905	-0.268368	0.365668	-0.178965	0.344182	-0.0589185	-0.0437901	-0.1084	0.537716	-0.106749	-0.449914	-0.0461237	-0.373259	-0.207188	-0.0379102	0.356004	0.00505761	-0.344359	-0.181575	-0.170228	0.18402	-0.200947	-0.179873	0.375337	-0.511318	-0.136509	-0.0189997	-0.0701206	-0.159333	0.302433	-0.0389021	-0.0867719	0.632028	-0.0452563	-0.0412149	-0.455585	0.296499	0.795805	0.806043	-0.245524	0.334017	0.829505	0.254012	-0.0741342	0.853041	0.147021	0.0262298	0.811983
	Se	0.0580468	-0.12462	0.354536	-0.0832512	0.310926	0.0860517	0.095021	0.0242758	0.386608	0.037606	-0.388829	0.0962503	-0.328655	-0.126316	0.0994227	0.387407	0.105055	-0.205743	-0.189962	-0.0681859	0.162305	-0.256281	-0.0857737	0.368012	-0.45694	-0.0266929	0.0105577	0.0777241	-0.171114	0.289201	0.0987749	-0.151543	0.459417	0.0916105	0.0960062	-0.399949	0.313079	0.633543	0.635703	-0.151738	0.275858	0.709236	0.394677	-0.0611315	0.70646	0.0834285	-0.120727	0.606909
	Sr	-0.333114	0.474618	-0.210186	-0.00948822	-0.414966	0.0884564	0.129123	-0.0220778	-0.671063	0.0226667	0.226261	0.118613	0.619992	0.0396093	0.135512	-0.19659	0.218117	0.725309	0.0681936	-0.0407404	0.0912492	0.196623	-0.0385414	-0.55111	0.520599	-0.0571777	-0.0362801	0.0521661	0.129124	-0.492543	0.144487	-0.170147	-0.111997	0.151808	0.143611	0.252088	-0.450659	-0.15861	-0.18306	0.43447	0.0569494	-0.182234	-0.0134597	0.0516804	-0.397982	-0.291358	-0.118855	-0.202549
	Te	-0.253632	-0.0759312	0.276086	-0.074702	-0.045108	-0.0354633	-0.0262301	-0.0336781	0.306806	-0.0516067	-0.282066	-0.0272055	-0.0800471	-0.0928286	-0.0230759	0.225052	0.0339286	-0.151569	-0.157987	-0.0722032	0.103829	-0.0326186	-0.0754857	-0.0161453	-0.245689	-0.0627619	-0.0298384	-0.0398795	-0.119111	-0.0725551	-0.0244547	-0.141191	0.820359	-0.0222292	-0.0274494	-0.233985	0.0881459	0.999372	0.998825	-0.0311172	0.442044	0.981396	0.164595	-0.00729134	0.750561	-0.110404	-0.0962875	0.854572
	Tl	-0.231348	0.627609	-0.380581	0.406424	-0.366201	0.415683	0.379993	0.422725	-0.453779	0.473112	0.561174	0.389226	0.676096	0.441763	0.379223	-0.347457	0.246297	0.0552783	0.41849	0.445509	-0.106215	0.138118	0.438127	-0.505582	0.420809	0.424494	0.299637	0.436996	0.347986	-0.293608	0.367545	0.0958819	-0.136748	0.362917	0.367135	0.569416	-0.00701565	-0.0272474	-0.0406595	0.619145	0.103864	-0.0680341	0.0546442	0.65473	-0.26571	0.0955758	0.371234	-0.0978154
	V	0.493099	-0.434687	0.659621	-0.258354	0.858806	-0.0278348	-0.0182133	-0.117725	0.668695	-0.0969288	-0.633175	-0.0202215	-0.73671	-0.294668	-0.0109032	0.733832	0.0614073	-0.36783	-0.249276	-0.224568	0.119053	-0.530045	-0.248902	0.95461	-0.875861	-0.156202	-0.0187991	-0.0394781	-0.290571	0.92804	-0.00891706	-0.167901	0.103679	-0.0383559	-0.00632328	-0.707995	0.494301	0.0175179	0.0338878	-0.490939	-0.0312436	0.110004	0.42776	-0.144178	0.625968	0.344634	0.22783	0.203912
	Zn	-0.19217	-0.0330959	0.345685	-0.0429122	0.05414	0.0625742	0.064465	0.0487884	0.356943	0.0445944	-0.33432	0.0660045	-0.123507	-0.0705026	0.0685411	0.32215	0.124814	-0.192792	-0.171078	-0.0191666	0.152463	-0.129292	-0.0322908	0.0890703	-0.347898	0.00510391	-0.0350854	0.0610154	-0.156023	0.0624616	0.065845	-0.121519	0.790062	0.05995	0.06318	-0.289873	0.172325	0.967366	0.968253	0.0239603	0.422277	0.969731	0.310243	0.0479719	0.811116	-0.026408	0.0336609	0.847485
	Au	-0.260905	-0.0753929	0.273254	-0.0779831	-0.0484726	-0.0331349	-0.0231662	-0.0328786	0.303289	-0.0509038	-0.280493	-0.0243322	-0.0838468	-0.0977509	-0.0202457	0.222056	0.0383477	-0.143152	-0.167588	-0.074788	0.10734	-0.034448	-0.0786695	-0.0189182	-0.238276	-0.0645698	-0.0421314	-0.0383506	-0.130479	-0.077512	-0.0220301	-0.143037	0.819613	-0.0187242	-0.0252469	-0.232209	0.0772529	0.999632	0.999113	-0.0299141	0.428731	0.983115	0.167148	-0.0209006	0.748878	-0.120373	-0.100588	0.856618
		W	Ag	As	Cd	Cu	Hg	In	S	Sb	Se	Te	Zn	Au
	W	1
	Ag	0.819165	1
	As	0.817159	0.998859	1
	Cd	0.790015	0.982148	0.983207	1
	Cu	0.653789	0.746534	0.755897	0.797709	1
	Hg	0.704654	0.854604	0.861435	0.877204	0.829995	1
	In	0.818767	0.978307	0.98239	0.973332	0.841299	0.863466	1
	S	0.804255	0.981595	0.981621	0.978134	0.776126	0.835635	0.9771	1
	Sb	0.632028	0.795805	0.806043	0.829505	0.853041	0.811983	0.85888	0.836991	1
	Se	0.459417	0.633543	0.635703	0.709236	0.70646	0.606909	0.683513	0.734169	0.767134	1
	Te	0.820359	0.999372	0.998825	0.981396	0.750561	0.854572	0.979417	0.982038	0.794519	0.633589	1
	Zn	0.790062	0.967366	0.968253	0.969731	0.811116	0.847485	0.969665	0.954835	0.804119	0.665966	0.967942	1
	Au	0.819613	0.999632	0.999113	0.983115	0.748878	0.856618	0.978327	0.981661	0.797331	0.633637	0.999435	0.967684	1
		CaO	Fe2O3	Cr	MgO	Sc	Sb	TiO2	Al2O3	Cu	Ni	V	Co	Ba	Y	Be	Mn
	CaO	1
	Fe2O3	0.326187	1
	Cr	0.575058	0.498636	1
	MgO	0.925445	0.300212	0.680321	1
	Sc	0.633186	0.68809	0.827326	0.703947	1
	Sb	0.365668	0.537716	0.344182	0.356004	0.375337	1
	TiO2	0.593778	0.568574	0.843506	0.698526	0.908366	0.302433	1
	Al2O3	-0.0318423	0.466276	0.388739	0.0378636	0.553598	0.087905	0.558863	1
	Cu	0.611861	0.593374	0.498554	0.613156	0.582473	0.853041	0.531825	0.109441	1
	Ni	0.542768	0.340265	0.64826	0.658436	0.675817	0.250493	0.630453	0.169618	0.502104	1
	V	0.659621	0.668695	0.858806	0.733832	0.95461	0.416682	0.92804	0.493099	0.625968	0.720767	1
	Co	0.388778	0.226682	0.348008	0.450387	0.382615	0.254012	0.341094	-0.0122993	0.44829	0.742585	0.42776	1
	Ba	-0.360066	-0.4406	-0.396866	-0.342723	-0.496196	-0.268368	-0.395973	-0.214325	-0.268104	-0.0990526	-0.434687	0.416245	1
	Y	-0.0939113	-0.0736131	-0.051714	-0.0577392	-0.0658313	-0.0452563	-0.0544673	-0.0443118	0.0342113	0.276822	-0.0383559	0.778709	0.759534	1
	Be	-0.483891	-0.355513	-0.367719	-0.442818	-0.509449	-0.245524	-0.411178	-0.178072	-0.273943	0.0163905	-0.490939	0.300768	0.676052	0.577781	1
	Mn	0.125345	-0.0256767	0.0439993	0.162665	0.0227995	-0.0126787	0.0170101	-0.178984	0.119404	0.41113	0.0584338	0.838283	0.709753	0.853181	0.450204	1
	HREE	-0.127605	-0.0883854	-0.0465459	-0.0745822	-0.0614937	-0.0637793	-0.0256492	-0.00914074	0.0267407	0.271168	-0.0381118	0.717523	0.711532	0.960949	0.59721	0.768091
		Ba	Hf	K2O	Nb	SiO2	Zr	Be	Cs	Rb	Sr	Tl	Pb	Ta	Bi	Ga	LREE
	Ba	1
	Hf	0.390453	1
	K2O	0.555769	0.604801	1
	Nb	0.273667	0.513463	0.507807	1
	SiO2	0.406469	0.680302	0.686582	0.113396	1
	Zr	0.414218	0.953609	0.639691	0.515908	0.724255	1
	Be	0.676052	0.455853	0.521979	0.263919	0.44989	0.526033	1
	Cs	0.328257	0.373102	0.560949	0.768152	0.030525	0.337195	0.315092	1
	Rb	0.550441	0.530835	0.798189	0.64157	0.408213	0.537117	0.591635	0.848279	1
	Sr	0.474618	0.226261	0.619992	0.0681936	0.520599	0.252088	0.43447	0.0516804	0.437711	1
	Tl	0.627609	0.561174	0.676096	0.41849	0.420809	0.569416	0.619145	0.65473	0.767446	0.286857	1
	Pb	0.156186	0.389594	0.353825	0.478197	0.369419	0.408328	0.225695	0.203479	0.248237	0.196623	0.138118	1
	Ta	0.114406	0.219178	0.392306	0.845179	-0.099704	0.206572	0.082623	0.710633	0.511684	-0.0362801	0.299637	0.321331	1
	Bi	0.0951726	0.0770904	0.204243	0.561228	-0.168726	0.0776415	0.184087	0.504209	0.372734	0.0569494	0.103864	0.269676	0.556283	1
	Ga	-0.0258825	0.0390361	-0.0125912	0.668802	-0.377175	-0.00727602	-0.0273209	0.566978	0.282011	-0.291358	0.0955758	0.151894	0.647413	0.440828	1
	LREE	0.363101	0.460119	0.355083	0.469774	0.198329	0.469317	0.36593	0.534379	0.473426	-0.0117824	0.435248	0.329569	0.323531	0.170636	0.332662	1
[truncated: 20 more columns]

## Sheet: interface samples
		Elements/oxides	Al2O3	Ba	CaO	Ce	Cr	Dy	Er	Eu	Fe2O3	Gd	Hf	Ho	K2O	La	Lu	MgO	MnO	Na2O	Nb	Nd	P2O5	Pb	Pr	Sc	SiO2	Sm	Sn	Ta	Tb	Th	TiO2	Tm	U	W	Y	Yb	Zr	LOI	Ag	As	Ba	Be	Bi	Cd	Co	Cs	Cu
		Units	%	ppm	%	ppm	ppm	ppm	ppm	ppm	%	ppm	ppm	ppm	%	ppm	ppm	%	%	%	ppm	ppm	%	ppm	ppm	ppm	%	ppm	ppm	ppm	ppm	ppm	%	ppm	ppm	ppm	ppm	ppm	ppm	%	ppm	ppm	ppm	ppm	ppm	ppm	ppm	ppm	ppm
		DL	0.01	1	0.01	0.1	1	0.05	0.05	0.05	0.01	0.05	1	0.05	0.01	0.1	0.05	0.01	0.01	0.01	1	0.1	0.01	1	0.05	1	0.01	0.1	1	0.5	0.05	0.1	0.01	0.05	0.05	1	1	0.1	5	0.01	0.01	0.5	0.2	0.2	0.1	0.05	0.2	0.1	0.2
		Method	AF02																																					LOI	MMA04
Hole ID	Depth (m)	Lab no.
DKRC0050	49-50	07-36264	12.4	407	1.47	26.8	124	2.28	1.42	0.73	4.56	2.31	3	0.48	1.88	14.3	0.21	1.46	0.08	2.89	4	12.4	0.12	11	3.23	15	71.3	2.4	< 1	< 0.5	0.41	3.6	0.43	0.21	0.7	3	13	1.3	121	3.44	0.06	3.4	416	1.1	0.1	0.08	13.5	1	30
DKRC0051	50-51	07-36265	10.8	339	6.17	20.5	111	1.8	1.2	0.59	3.8	1.96	3	0.39	1.77	10.7	0.16	1.86	0.1	2.11	4	9.8	0.13	11	2.53	14	64.58	2	< 1	< 0.5	0.31	3.1	0.43	0.17	0.76	2	11	1.1	113	8.25	0.04	3.6	384	1	< 0.1	< 0.05	13.3	0.9	26.5
DKRC0052	53- 54	07-36266	11.8	318	6.52	18.3	160	2.21	1.46	0.68	5.64	2.2	3	0.47	1.44	9.2	0.21	3.12	0.1	2.56	3	9.5	0.06	9	2.37	21	61.07	2.2	< 1	< 0.5	0.37	2.7	0.53	0.2	0.64	1	12	1.3	107	7.18	0.05	1.3	313	0.9	< 0.1	0.05	19.8	1	65.6
DKRC0053	45-46	07-36267	14.2	212	1.42	13.1	228	2.22	1.42	0.63	8.81	2.06	2	0.5	0.95	6.5	0.21	5.01	0.1	2.11	3	7.6	0.14	6	1.79	33	61.1	1.9	< 1	< 0.5	0.38	1.7	0.73	0.21	0.61	2	12	1.4	68	5.48	0.08	9.5	242	0.8	< 0.1	0.05	47.3	0.7	56.4
DKRC0054	52-53	07-36268	12.7	331	5.54	27.5	244	3.18	1.89	0.92	7.51	3.46	3	0.69	1.49	13.7	0.26	4.41	0.11	2.41	4	14.8	0.15	8	3.5	24	56.72	3.3	< 1	< 0.5	0.59	4	0.7	0.27	0.82	2	18	1.7	89	8.32	0.06	11	333	1.1	0.3	0.08	43.3	1.7	62.6
DKRC0055	37-38	07-36269	16.3	45	4.69	8.8	257	3.35	2.15	0.82	10.91	2.98	2	0.73	0.19	3.8	0.3	5.06	0.09	1.81	2	7.4	0.14	2	1.45	53	51.13	2.3	< 1	< 0.5	0.55	0.5	0.95	0.32	0.61	< 1	18	2	57	8.73	0.06	6	41.1	0.4	< 0.1	0.19	66	0.1	176.7
DKRC0056	49-50	07-36270	13.6	430	4.18	48.9	118	3.37	1.94	0.94	6.04	3.71	3	0.69	2.58	24.6	0.27	3.21	0.1	2.26	7	21.1	0.06	15	5.66	17	60.48	4	2	0.6	0.59	9.3	0.53	0.29	1.26	4	18	1.8	122	6.93	0.12	6	461	1.7	0.2	0.06	19.5	4.4	39.1
DKRC0057	45-46	07-36271	12.2	456	2.04	35	104	2.82	1.77	0.9	4.18	3.06	5	0.6	2.05	18	0.24	1.97	0.05	2.8	6	16.4	0.17	12	4.29	12	70.02	3.3	< 1	< 0.5	0.5	4.3	0.47	0.26	0.9	3	16	1.6	188	4.03	0.07	1.8	475	1.2	0.1	0.07	13.2	1.5	27.6
DKRC0058	47-48	07-36272	12.6	346	4.37	22.7	147	2.42	1.49	0.69	5.71	2.37	3	0.53	1.62	11.6	0.22	2.84	0.08	2.61	4	11.1	0.11	10	2.82	19	64.8	2.4	< 1	< 0.5	0.4	3.3	0.55	0.22	0.71	2	13	1.4	116	4.72	0.05	3.2	354	1	< 0.1	0.06	19.1	1	43.8
DKRC0059	49-50	07-36273	11.5	363	4.63	23.7	105	2.01	1.29	0.67	4.69	2.22	3	0.45	1.65	12.3	0.17	2.45	0.08	2.5	4	11.3	0.12	11	2.93	14	65.32	2.2	< 1	< 0.5	0.37	3.6	0.46	0.18	0.76	2	12	1.2	116	6.6	0.05	1.7	386	1	< 0.1	< 0.05	14.8	1.1	29.1
DKRC0060	55-56	07-36274	12.6	302	5.57	21.6	153	2.55	1.67	0.72	7.38	2.53	3	0.56	1.44	10.8	0.23	4.32	0.11	2.03	4	11.1	0.08	9	2.76	25	60.52	2.4	< 1	< 0.5	0.46	3.3	0.62	0.24	0.67	1	15	1.6	114	5.31	0.05	1.9	277	0.9	< 0.1	0.07	24.3	1.1	55.4
DKRC0061	47-48	07-36275	12.3	236	6.81	26.9	254	3.71	2.47	0.96	9.47	3.6	3	0.84	1.07	13.3	0.35	5.55	0.16	2.13	5	14	0.07	7	3.39	29	53.08	3.2	< 1	< 0.5	0.63	3.4	0.84	0.38	1.11	2	22	2.3	108	8.51	0.08	9.8	218	0.8	< 0.1	0.08	44.2	2.5	119.2
DKRC0062	36-37	07-36276	14.7	91	2.45	12.3	361	2.77	1.95	0.66	10.44	2.29	2	0.65	0.85	4.3	0.29	3.76	0.17	2.15	3	6.4	0.15	2	1.39	29	55.72	1.9	< 1	< 0.5	0.47	0.8	0.79	0.29	0.68	< 1	16	1.8	74	8.82	0.14	10.5	96.8	2.4	< 0.1	0.11	106	0.5	71.6
DKRC0063	41-42	07-36277	12.5	392	5.79	32.7	219	3.35	2.13	0.86	6.6	3.24	3	0.72	1.65	17.1	0.3	4.15	0.16	2.45	5	15.7	0.17	12	3.96	19	59.91	3.2	6	< 0.5	0.56	5.2	0.65	0.31	0.85	1	19	2	127	6.01	0.06	3.9	360	1.1	0.1	0.08	23.5	1.4	65.9
DKRC0064	37-38	07-36278	15.3	134	5.12	14.2	209	4	2.72	0.98	10.11	3.39	3	0.89	0.7	6.7	0.37	4.89	0.13	2.47	3	9.7	0.09	4	2.1	34	54.86	2.7	< 1	< 0.5	0.65	1.2	0.86	0.38	0.32	< 1	24	2.5	92	5.43	0.05	2.1	144	0.5	< 0.1	0.16	52.5	0.3	134.8
DKRC0065	46-47	07-36279	12.3	238	7.82	25	257	3.58	2.29	0.97	8.49	3.45	3	0.77	0.96	12.8	0.33	5.92	0.16	2.26	4	13.4	0.05	7	3.22	25	52.01	3.1	< 1	< 0.5	0.58	3.1	0.78	0.35	0.84	2	20	2.1	101	9.22	0.06	< 0.5	227	0.8	< 0.1	0.07	28.2	1.1	79.1
DKRC0066	43-44	07-36280	12.5	180	8.6	18.6	196	3.22	2.12	0.8	9.11	2.97	2	0.72	0.88	8.9	0.31	6.72	0.15	2.25	4	10.7	0.1	7	2.48	31	49.85	2.6	< 1	< 0.5	0.55	2.4	0.82	0.32	0.63	2	19	2	86	9.06	0.05	21.8	166	0.7	< 0.1	0.1	46.6	0.7	59.1
DKRC0067	38-39	07-36281	12.4	375	4.69	29.7	174	2.85	1.84	0.85	6.96	3.01	3	0.61	1.66	15.4	0.26	3.3	0.1	2.67	5	14.5	0.12	11	3.68	19	62.22	3	1	< 0.5	0.5	4.8	0.62	0.26	0.84	2	16	1.7	125	5.25	0.06	6.9	377	1.2	0.1	0.05	22.1	1.4	54.2
DKRC0068	47-48	07-36282	13.4	275	6.32	24.5	166	2.4	1.51	0.74	6.95	2.47	2	0.52	1.29	12.5	0.21	4.92	0.11	2.46	4	11.9	0.19	8	3.05	19	55.56	2.4	< 1	< 0.5	0.43	3.9	0.58	0.23	0.85	2	14	1.4	80	8.18	0.1	2.9	288	0.9	0.1	0.07	28	1.7	58.8
DKRC0069	50- 51	07-36284	11.9	279	7.76	18.9	153	2.57	1.66	0.71	6.79	2.43	3	0.58	1.2	9.5	0.23	3.5	0.18	2.16	3	10.1	0.15	8	2.39	21	59.39	2.2	< 1	< 0.5	0.45	2.4	0.56	0.25	0.57	1	15	1.5	118	6.39	0.05	< 0.5	261	0.8	< 0.1	0.05	25.3	0.7	49.8
DKRC0070	47-48	07-36285	11.8	322	6.75	18.6	184	2.37	1.58	0.72	6.2	2.3	3	0.52	1.3	9.6	0.23	3.28	0.15	2.17	3	9.5	0.07	9	2.35	20	60.24	2.1	< 1	< 0.5	0.4	2.6	0.56	0.25	0.58	2	14	1.5	105	7.44	0.06	2.2	285	0.8	< 0.1	0.08	23.5	0.8	50
DKRC0095	39-40	07-36286	12.8	443	2.38	23.2	244	2.71	1.73	0.79	7.14	2.54	3	0.58	1.45	11.8	0.24	4	0.13	2.67	4	12.2	0.1	11	3.03	19	63.32	2.5	< 1	< 0.5	0.45	3	0.61	0.27	0.86	1	15	1.6	121	5.42	0.05	4	323	1	< 0.1	0.11	27.3	0.9	39
DKRC0096	43-44	07-36287	10.6	493	9.76	41	147	2.32	1.4	0.72	3.5	2.76	4	0.46	2.27	21.5	0.18	1.95	0.17	2.12	6	17.6	0.06	16	4.77	10	58.44	3.2	1	< 0.5	0.4	7.9	0.37	0.21	1.15	2	13	1.2	143	10.76	0.05	1.2	448	1.3	0.2	0.06	12.5	2.3	16
DKRC0097	45-46	07-36288	11.9	442	8.06	36.7	203	2.97	1.86	0.91	5.41	3.15	3	0.62	1.88	19.2	0.26	3.7	0.19	2	5	17.1	0.14	12	4.42	16	56.26	3.3	1	< 0.5	0.53	6	0.49	0.27	1.39	3	16	1.6	119	9.99	0.07	6.8	381	1	0.2	0.06	19.9	1.8	33.7
DKRC0098	37-38	07-36289	15.3	69	3.48	10	310	4.31	2.82	0.93	13.11	3.33	2	0.96	0.28	4.1	0.41	5.29	0.15	1.8	3	7.8	< 0.01	2	1.53	41	53.18	2.5	< 1	< 0.5	0.69	0.6	0.95	0.43	0.52	1	23	2.7	71	6.44	0.06	9.9	65.6	0.6	< 0.1	0.12	59.4	0.4	121.4
DKRC0099	36-37	07-36290	11.7	245	5.26	16.6	195	2.48	1.71	0.62	8.06	2.26	2	0.55	1.1	8.3	0.24	3.88	0.15	2.27	3	8.9	0.07	8	2.14	24	60.66	2.1	< 1	< 0.5	0.41	2.3	0.6	0.26	0.85	2	15	1.6	94	6.29	0.07	7	230	0.7	< 0.1	0.17	27.1	0.9	49.3
DKRC0100	26-27	07-36291	10.5	536	4.42	30.3	121	2.4	1.48	0.8	3.94	2.65	6	0.51	1.94	16	0.19	1.46	0.12	2.45	5	14.1	0.09	14	3.68	10	68.16	2.7	1	< 0.5	0.42	4.7	0.4	0.22	1	2	14	1.4	213	6.55	0.05	4.5	463	1.2	0.1	0.08	10	1.1	14.6
DKRC0101	50-51	07-36292	12.2	266	6.84	15.4	176	2.37	1.58	0.68	7.4	2.16	2	0.53	1.12	7.6	0.21	3.91	0.14	2.33	3	8.4	0.03	7	2.02	23	59.76	2.1	< 1	< 0.5	0.39	1.9	0.61	0.23	0.47	2	14	1.5	88	5.63	0.04	2.1	250	0.8	< 0.1	0.07	27.5	0.6	42.5
DKRC0124	46-47	07-36293	12.5	370	5.51	24.3	149	2.73	1.75	0.76	6.31	2.74	3	0.55	1.58	12.7	0.26	3.59	0.11	2.24	4	12.5	0.08	9	3.07	17	60.66	2.6	2	< 0.5	0.46	2.9	0.59	0.27	0.66	< 1	16	1.7	104	6.87	0.05	1.3	353	0.9	< 0.1	0.08	26.1	1.1	42.5
DKRC0125	46-47	07-36294	11.8	478	3.13	34.7	114	2.6	1.62	0.85	4.12	2.92	4	0.56	2.03	18.6	0.24	1.77	0.1	2.66	5	15.8	0.11	12	4.17	10	68.14	3	1	< 0.5	0.45	4.4	0.44	0.24	0.93	< 1	15	1.6	157	5.72	0.2	6.9	478	1.3	0.2	0.08	13.2	1.4	19.4
DKRC0126	47-48	07-36295	12.8	272	3.59	16.1	195	2.51	1.65	0.67	7.24	2.33	2	0.54	1.1	8	0.22	3.3	0.18	2.75	3	9.1	0.04	7	2.13	21	64.88	2	< 1	< 0.5	0.41	1.9	0.68	0.24	0.5	< 1	14	1.6	92	3.4	0.04	4.2	240	0.8	< 0.1	0.09	27.8	0.6	46.3
DKRC0127	47-48	07-36296	12.1	352	4.56	19.4	145	2.37	1.53	0.74	6.15	2.32	3	0.52	1.43	9.9	0.22	3.1	0.09	2.39	4	10.1	0.08	8	2.45	18	64.07	2.3	< 1	< 0.5	0.4	2.2	0.52	0.23	0.53	1	14	1.4	108	5.53	0.05	2.1	307	0.9	< 0.1	0.05	21.1	0.8	36.4
DKRC0094	36-37	07-36297	12	489	1.32	34.8	95	3.01	1.91	0.92	5.21	3.07	5	0.67	1.93	18.1	0.27	2.1	0.17	2.26	5	16.1	0.09	12	4.21	10	69.26	3.1	< 1	< 0.5	0.51	3.8	0.47	0.28	0.86	2	18	1.8	174	5.25	0.07	12.5	445	1.2	0.1	0.15	19.5	1.5	27.2
DKRC0122	61-64	07-36338	13.7	477	1.58	39.4	< 1	3.62	2.21	0.95	10.32	3.32	3	0.74	1.97	18.3	0.28	4.41	0.18	2.02	4	17.5	0.04	12	4.3	24	59.67	3.5	1	< 0.5	0.55	4.8	0.69	0.33	0.82	33	19	2.2	119	5.36	0.14	25.6	431	1.3	0.2	0.12	32.7	7.1	61.5
DKRC0123	65-68	07-36339	13.5	264	6.01	30.4	< 1	3.53	2.17	0.96	9.03	3.02	3	0.73	1.45	13.9	0.29	5.95	0.12	2.12	3	14.8	0.06	8	3.42	29	55.24	3.1	1	< 0.5	0.54	3.2	0.77	0.32	0.6	1	19	2.1	98	5.73	0.06	4.3	237	1	0.1	0.07	32.9	2.1	69.2
[truncated: 20 more columns]

## Sheet: Redox samples
		Elements/oxides	Al2O3	Ba	CaO	Ce	Cr	Dy	Er	Eu	Fe2O3	Gd	Hf	Ho	K2O	La	Lu	MgO	MnO	Na2O	Nb	Nd	P2O5	Pb	Pr	Sc	SiO2	Sm	Sn	Ta	Tb	Th	TiO2	Tm	U	W	Y	Yb	Zr	LOI	Ag	As	Ba	Be	Bi	Cd	Co	Cs	Cu
		Units	%	ppm	%	ppm	ppm	ppm	ppm	ppm	%	ppm	ppm	ppm	%	ppm	ppm	%	%	%	ppm	ppm	%	ppm	ppm	ppm	%	ppm	ppm	ppm	ppm	ppm	%	ppm	ppm	ppm	ppm	ppm	ppm	%	ppm	ppm	ppm	ppm	ppm	ppm	ppm	ppm	ppm
		DL	0.01	1	0.01	0.1	1	0.05	0.05	0.05	0.01	0.05	1	0.05	0.01	0.1	0.05	0.01	0.01	0.01	1	0.1	0.01	1	0.05	1	0.01	0.1	1	0.5	0.05	0.1	0.01	0.05	0.05	1	1	0.1	5	0.01	0.01	0.5	0.2	0.2	0.1	0.05	0.2	0.1	0.2
		Method	AF02																																					LOI	MMA04
Hole ID	Depth (m)	Lab no.
DKRC0051	14- 15	07-36216	15.4	1760	0.34	91.8	152	11.4	8.76	1.97	8.25	9.94	4	2.69	3.16	40.3	1.15	1.3	0.37	0.58	9	42.6	0.15	16	10.9	18	60.5	9	2	0.7	1.73	12.9	0.57	1.35	2.39	2	98	8.1	144	9.42	0.07	16.5	1680	2.6	0.3	< 0.05	32	6.8	63.5
DKRC0051	15- 16	07-36217	12	654	0.55	50.4	108	9.7	7.63	1.32	6.24	7.09	4	2.35	2.64	23.3	1	0.68	0.27	2.21	5	22.3	0.04	14	5.87	12	69.32	5	2	< 0.5	1.4	6.6	0.5	1.16	2.01	1	81	7.2	138	5.53	0.04	11.5	651	2	0.2	< 0.05	74.9	5.2	35.8
DKRC0052	18- 19	07-36218	11.2	492	2.92	47.7	123	3.12	1.88	0.89	6.92	3.48	3	0.64	2.66	21.1	0.27	3	0.12	1.95	7	18.5	0.08	15	5.04	15	61.43	3.7	2	0.6	0.53	8.6	0.57	0.28	1.07	2	19	1.8	129	9.11	0.07	5.7	474	1.5	0.2	0.14	20.8	3.1	42.7
DKRC0053	9-10m	07-36219	15.8	203	0.25	123	174	1.46	1.09	0.3	14.32	1.29	4	0.33	0.69	84.5	0.2	0.26	0.01	0.12	6	18.6	0.14	22	9.49	21	58.29	1.6	1	< 0.5	0.2	6.2	0.81	0.18	1.62	3	8	1.4	136	9.27	0.03	36	201	0.9	0.2	< 0.05	2.8	0.9	149
DKRC0053	35-36	07-36220	10.1	512	0.8	28.6	127	1.88	1.15	0.67	2.89	2.13	4	0.39	2.24	13.9	0.15	0.93	0.04	2.58	5	12.4	0.02	13	3.4	9	75.05	2.4	< 1	< 0.5	0.32	4	0.42	0.18	1.01	2	11	1.1	145	4.97	0.04	6.1	518	1.2	0.1	0.05	8.4	1.1	16.7
DKRC0054	19-20	07-36221	10.4	908	0.57	58.1	150	20.7	18.3	2.31	6.44	14.5	4	5.51	2.21	24.3	2.28	1.07	0.39	2.35	5	29	0.12	11	6.51	11	69.55	7.2	1	< 0.5	2.85	4.1	0.47	2.7	1.69	2	263	15.6	157	6.37	0.11	5.8	851	6.2	0.1	0.09	58.6	4.4	29.2
DKRC0056	20-21	07-36222	10.8	467	0.96	34.5	111	2.47	1.56	0.87	9.6	2.81	4	0.51	1.9	17.1	0.21	1.04	0.09	3.18	5	15.7	0.12	10	4.25	10	66.42	3	< 1	< 0.5	0.43	4	0.46	0.23	1.56	2	15	1.5	142	5.43	0.05	4	478	1.4	0.1	0.11	16.8	1.7	26.3
DKRC0057	17-18	07-36223	11.7	501	0.93	47	157	2.85	1.59	0.9	5.98	3.19	4	0.55	2.36	23	0.21	1.48	0.07	2.87	6	19.2	0.13	13	5.29	15	68.28	3.6	1	< 0.5	0.48	7.4	0.54	0.25	1.3	1	15	1.5	138	5.63	0.07	6	510	1.6	0.2	0.09	15.3	2.7	33
DKRC0058	9-10m	07-36224	8.55	576	0.51	22.6	87	2.08	1.46	0.52	22.16	1.9	2	0.46	1.87	11.1	0.21	0.44	0.44	1.95	3	9.2	0.28	10	2.54	9	56.92	1.8	< 1	< 0.5	0.33	3.1	0.32	0.22	5.75	2	17	1.4	91	6.55	0.03	9.1	597	1.6	< 0.1	0.06	33.4	3	24.2
DKRC0058	22-23	07-36225	12.2	355	1.35	27.1	1160	3.13	1.88	0.87	11.21	3.26	3	0.65	1.58	13.1	0.22	2.42	0.16	2.5	4	13	0.17	8	3.29	35	58.24	2.8	< 1	< 0.5	0.53	3.2	0.8	0.26	1.81	2	21	1.6	88	9.41	0.09	9.7	330	1.1	0.1	0.11	39.5	1.8	80.7
DKRC0059	11-12m	07-36226	10.4	572	0.47	49.1	119	2.88	1.82	0.86	13.15	3.19	4	0.59	2.66	23.1	0.25	0.75	0.22	1.86	6	20.3	0.14	14	5.82	12	63.66	3.8	1	< 0.5	0.49	6.9	0.46	0.28	3.8	2	17	1.7	148	6.18	0.04	14.9	538	1.5	0.2	< 0.05	8.8	5.2	28.2
DKRC0059	15-16	07-36227	11.2	619	0.6	50.4	152	7.94	5.62	1.61	10.4	7.17	4	1.78	2.19	19.8	0.68	0.97	0.63	2.48	4	27.3	0.03	12	6.63	20	64.59	6.3	1	< 0.5	1.22	5.7	0.52	0.81	3.18	2	59	5.1	124	6.43	0.08	13.9	630	2.1	0.5	0.14	112	3.3	42
DKRC0060	18-19	07-36228	11.7	537	2.2	45.8	139	3.03	1.79	0.86	6.45	3.39	4	0.61	2.82	20.8	0.24	2.25	0.08	2.19	8	18.4	0.17	15	5.16	15	64.82	3.7	2	0.6	0.51	9.4	0.61	0.27	1.34	2	17	1.7	147	6.71	0.11	5.7	529	1.6	0.2	0.07	20.8	3.9	41.3
DKRC0062	19-20	07-36229	12.2	827	0.49	168	131	43.2	32.1	7.16	6.6	37.4	4	10.2	2.36	70.6	4.11	1	0.15	2.05	5	107	0.13	35	22.6	15	68.05	26	1	< 0.5	6.68	4.9	0.55	4.79	2.38	1	401	29.7	153	6.45	0.07	5.3	787	2.9	0.1	< 0.05	20.4	6.5	43
DKRC0063	23-24	07-36230	10.2	858	0.75	39.3	155	2.66	1.77	0.78	7.63	2.82	4	0.57	2.04	16.7	0.22	1.16	0.24	2.44	5	14.7	0.04	15	4.01	10	68.85	2.8	1	< 0.5	0.44	4.7	0.5	0.26	1.34	2	18	1.6	146	6.19	0.06	5.8	983	3.7	0.1	0.12	39.4	2.3	26.1
DKRC0063	30-31	07-36231	10.4	634	0.93	35.3	111	2.54	1.45	0.86	3.1	2.69	5	0.5	2.24	15.7	0.21	1.06	0.42	3.02	5	14.4	0.08	15	3.82	10	74.3	2.8	< 1	< 0.5	0.41	4.2	0.44	0.23	0.77	1	14	1.4	175	3.95	0.04	4.7	605	1.3	0.1	0.25	10.1	1.6	18.1
DKRC0064	24-25	07-36232	11.5	636	1.23	33.9	103	2.21	1.34	0.81	7.46	2.56	3	0.46	2.22	16.5	0.17	0.79	0.24	3.78	4	14.6	0.14	15	4.02	9	68.17	2.8	< 1	< 0.5	0.39	3.9	0.43	0.19	1.25	2	14	1.3	125	4.09	0.05	5	656	1.9	0.2	0.16	15.5	2.2	24.6
DKRC0065	14-15	07-36233	11.6	828	0.57	66.9	202	9.67	7.21	1.78	6.27	8.11	4	2.27	2.44	26.2	1.01	1.03	0.2	2.65	6	30.2	0.06	15	7.53	13	68.6	6.7	2	0.5	1.42	7.5	0.52	1.12	1.83	2	76	7.2	161	6.07	0.08	6	805	3.5	0.2	0.06	88.8	4	41
DKRC0065	22-23	07-36234	11.3	534	1.22	35.2	141	2.61	1.59	0.85	5.27	2.88	4	0.53	2.11	16.1	0.21	1.3	0.17	3.15	5	14.8	0.07	13	4.02	14	69.68	3	1	< 0.5	0.45	4.5	0.52	0.24	1.61	1	15	1.5	154	5.23	0.06	4.3	542	1.4	0.1	0.14	16.5	1.4	27
DKRC0066	28-29	07-36235	11.1	557	0.92	36.9	136	2.94	1.74	0.92	4.4	3.19	5	0.59	2.34	18	0.23	1.3	0.12	2.42	6	16.6	0.08	13	4.35	11	72.06	3.3	1	0.5	0.49	5	0.44	0.25	1.25	1	18	1.6	182	4.8	0.05	5.3	543	1.3	0.1	0.08	12.4	1.2	19
DKRC0067	24-25	07-36237	13.2	486	1.96	39.1	94	2.9	1.66	1	5.35	3.37	4	0.56	1.74	18	0.22	1.85	0.16	3.31	5	17.1	0.19	10	4.6	17	67.05	3.4	1	< 0.5	0.5	3.5	0.6	0.24	1.22	1	16	1.5	132	4.6	0.06	4.6	452	1.3	< 0.1	0.12	20	1.4	36.7
DKRC0068	9-10m	07-36238	12.5	734	0.47	41	120	4.16	2.8	1.06	5.15	4.43	4	0.91	2.6	19.1	0.34	1.17	0.18	1.91	6	19.5	0.02	15	5.02	18	69.46	4.1	1	0.5	0.7	7	0.5	0.41	1.35	2	29	2.5	158	6.03	0.07	7.7	739	2	0.2	< 0.05	22.8	3.8	34.3
DKRC0068	36-37	07-36239	11	503	1.09	32.9	109	2.77	1.65	0.85	4.69	2.88	5	0.55	2.25	15.7	0.22	1.23	0.03	2.52	5	14.4	0.1	15	3.86	12	72.9	2.8	< 1	< 0.5	0.48	4.7	0.45	0.25	0.96	< 1	16	1.6	199	3.76	0.05	6.6	518	1.5	0.1	0.05	8.1	1.2	19.5
DKRC0069	10 - 11m	07-36240	15.7	578	0.66	101	128	3.16	1.89	1.05	7.79	4.26	4	0.63	3.86	49.9	0.28	1.33	0.02	0.62	11	35.8	0.2	23	10.7	18	59.94	5.7	3	0.9	0.55	17.6	0.58	0.3	2.91	2	17	2	144	9.26	0.07	10.6	599	2.4	0.4	< 0.05	6.4	7.3	37.5
DKRC0070	14-15	07-36241	13.2	748	0.49	63.7	115	10.4	8.02	1.73	7.04	8.67	5	2.44	2.63	27.4	1.06	1.06	0.26	1.6	6	38.6	0.16	19	8.82	15	66.72	7.7	1	0.5	1.54	6.9	0.49	1.22	2.19	2	86	7.5	173	6.39	0.09	24.4	738	2.4	0.2	< 0.05	63.6	5.1	53.1
DKRC0070	15-16	07-36242	12.5	707	0.48	48.4	117	9.55	7.29	1.46	5.63	7.54	5	2.26	2.82	22.5	0.94	1.12	0.18	1.71	7	23.5	0.14	15	5.65	14	68.72	5.7	1	< 0.5	1.38	7.7	0.48	1.11	2.21	2	81	6.9	173	6.2	0.05	8.8	649	2	0.2	0.05	57.9	4.8	38.2
DKRC0094	7-8m	07-36243	19	25	0.12	16.5	123	3.36	2.66	0.5	26.32	2.11	4	0.77	0.2	11.1	0.48	0.25	< 0.01	0.05	5	6.7	0.16	9	1.85	27	41.32	2	1	< 0.5	0.47	2.9	1.32	0.48	2.62	8	15	3.5	137	11.29	0.03	32.9	39.4	2	6.8	< 0.05	5.3	0.8	140.2
DKRC0094	9-10m	07-36244	14.7	98	0.21	9.8	160	1.99	1.62	0.27	13.33	1.18	5	0.46	0.49	8.1	0.28	0.37	0.02	0.11	6	3.4	0.09	7	1.03	18	62.57	1	1	< 0.5	0.28	6.9	0.66	0.27	1.39	2	10	2.1	189	7.48	0.04	10.7	108	1	0.2	< 0.05	7.8	0.7	47.4
DKRC0095	5-6m	07-36245	13.8	88	0.15	38.2	101	1.36	1.02	0.26	4.49	1.1	5	0.3	0.36	16.2	0.18	0.2	0.01	0.08	6	11.6	0.14	12	4	11	73	1.4	1	< 0.5	0.19	6.2	0.57	0.17	1.28	2	8	1.3	181	7.18	0.03	10.7	85.4	0.8	0.1	< 0.05	1.9	0.5	32.9
DKRC0096	6-7m	07-36246	13.2	136	4.22	697	94	28.2	10.1	12.5	14.66	47.1	4	4.31	0.48	192	0.85	0.7	0.08	0.13	6	333	0.15	17	85.1	12	54.45	68	1	< 0.5	6.02	11.9	0.43	1.31	3.32	2	84	7.4	147	11.54	0.03	15.9	138	1.4	0.2	0.08	37.8	2	124
DKRC0097	14-15	07-36247	14.7	819	0.42	102	86	8.82	4.28	3.07	8.6	11.9	5	1.57	2.61	40	0.53	1.08	0.07	2.14	8	59	0.12	13	14.2	22	63.99	12.3	1	< 0.5	1.68	8.5	0.55	0.63	2.28	2	38	4	212	5.76	0.07	5.5	766	2.4	0.1	< 0.05	14.8	4.3	42.1
DKRC0097	19-20	07-36248	11.8	623	0.74	36.1	107	3.25	2.23	0.95	4.72	3.64	4	0.74	2.11	17.9	0.31	1.3	0.2	2.43	5	17.4	0.16	11	4.53	15	70.21	3.5	1	< 0.5	0.55	4.2	0.47	0.35	1.39	1	27	2.1	163	5.9	0.07	3.6	644	4.2	0.1	0.09	20.2	2.6	25
DKRC0098	11-12m	07-36249	14.5	527	0.47	64.7	135	6.69	4.33	1.62	8.2	6.91	4	1.42	1.99	21.2	0.55	1.2	0.07	1.98	5	29.5	0.1	9	7.28	19	64.21	6.4	1	< 0.5	1.11	4	0.58	0.66	1.44	2	43	4	133	6.68	0.05	6.4	510	2.3	0.1	< 0.05	14.9	2.8	41.5
DKRC0099	18-19	07-36250	11.9	533	0.97	33.9	97	2.5	1.54	0.85	5.69	2.84	4	0.53	2.1	15.7	0.19	1.22	0.14	2.89	5	14.8	0.08	11	3.9	11	69.47	3	1	< 0.5	0.43	3.5	0.42	0.22	1.21	2	16	1.4	137	5.13	0.05	4.4	491	1.3	0.1	0.1	13.6	1.2	25.9
DKRC0100	14-15	07-36251	11.8	603	1.07	36.9	126	3.15	1.95	0.98	12.28	3.35	3	0.65	1.85	17.6	0.24	1.18	0.25	2.73	5	16.7	0.1	11	4.4	14	62.36	3.3	1	< 0.5	0.53	3.9	0.49	0.3	2.14	1	19	1.8	123	5.9	0.05	6.6	577	1.9	0.1	0.13	53.2	2.7	37.8
DKRC0101	14-15	07-36252	12.6	938	0.44	32.9	78	11.7	9.56	1.2	6.36	7.23	5	2.9	2.8	13.8	1.27	0.85	0.65	1.63	6	15.4	0.15	15	3.98	14	68.11	4.1	1	< 0.5	1.54	5.1	0.43	1.49	1.99	2	105	9.2	178	5.95	0.04	13.8	794	2.3	0.1	0.07	88	5.2	40.8
DKRC0122	14-15	07-36253	21.2	55	0.1	7.4	241	1.19	0.99	0.17	21.16	0.74	7	0.27	0.17	3.4	0.18	0.14	< 0.01	0.1	18	3.1	0.05	13	0.85	14	44.25	0.7	4	1.3	0.16	24.7	1.13	0.16	1.27	3	8	1.2	238	11.73	0.11	30.9	62.3	0.5	0.6	< 0.05	7	1.1	21.2
DKRC0123	27-28	07-36254	11.8	1050	0.36	98.8	78	5.95	2.59	2.24	5.13	7.96	4	1.02	1.91	38.1	0.27	0.56	0.38	1.66	4	41.5	0.12	17	10.4	10	72.52	8.6	1	< 0.5	1.14	3.4	0.41	0.37	0.94	1	21	2.2	148	5.2	0.04	4.1	1210	1.7	0.1	< 0.05	43.5	2.4	29.3
DKRC0123	46-47	07-36255	12.4	664	0.7	42.3	142	3.79	2.48	1.04	4.63	3.98	4	0.84	2.4	23.7	0.37	1.29	0.09	2.89	5	19.7	0.09	15	5.24	10	69.56	3.8	< 1	< 0.5	0.6	5.3	0.43	0.37	1.2	2	29	2.3	136	5.51	0.06	5	653	2.2	0.2	0.07	15.3	2.5	26.3
DKRC0124	18-19	07-36256	15	546	0.16	8.6	128	1.13	0.88	0.26	7.17	0.76	4	0.27	1.82	2.2	0.19	0.56	0.14	0.14	5	2.5	< 0.01	28	0.63	18	67.21	0.7	< 1	< 0.5	0.15	4.1	0.54	0.16	1.36	3	7	1.1	135	7.27	0.03	7.6	550	1.3	0.1	< 0.05	13.9	3.2	52.5
DKRC0124	39-40	07-36258	12.3	650	1	37.8	163	2.29	1.41	0.84	4.03	2.69	4	0.47	2.56	19.1	0.2	1.2	0.14	3	5	16.6	0.18	16	4.48	10	70.12	3.1	< 1	< 0.5	0.39	5.2	0.43	0.2	1.12	2	13	1.3	139	5.02	0.06	3.9	647	1.4	0.1	0.14	13.7	2.4	23.2
DKRC0125	19-20	07-36259	12.6	461	1.01	33.9	154	3.13	1.89	0.93	6.73	3.18	4	0.63	1.64	16	0.28	1.46	0.22	2.9	5	15.5	0.07	13	3.98	19	66.54	3.2	1	< 0.5	0.51	3.6	0.56	0.27	1.23	< 1	18	1.7	134	6.26	0.08	7.7	453	2.4	0.1	0.07	46.2	2	45.4
DKRC0126	21-22	07-36260	13	718	0.75	37.7	213	19.8	14.7	2.96	4.58	16.6	4	4.71	2	16.5	1.99	1.12	0.45	2.9	4	27.8	0.13	16	5.33	17	69.29	10.2	1	< 0.5	3.01	4.4	0.54	2.08	1.92	2	170	12.3	127	5.23	0.29	6.2	750	4.1	0.1	0.16	226	2	57
DKRC0127	23-24	07-36261	12.3	429	1.04	30	128	2.63	1.72	0.85	5.68	2.87	4	0.55	1.78	15.1	0.24	1.23	0.15	2.65	4	14.6	0.07	15	3.79	15	69.21	3	1	< 0.5	0.44	3.8	0.51	0.24	1.23	< 1	16	1.6	127	5.39	0.07	4.7	456	1.3	0.2	0.11	20.7	2.3	33.1
DKRC0127	29-30	07-36262	12	530	1.06	30.4	114	2.16	1.34	0.79	4.04	2.45	4	0.45	2.14	14.5	0.2	1.3	0.09	3.04	4	13.4	0.13	14	3.54	11	71.18	2.8	< 1	< 0.5	0.36	3.5	0.43	0.19	0.92	1	12	1.3	138	4.61	0.06	2.3	507	1.2	0.2	0.08	15.8	1.3	25.6
[truncated: 20 more columns]

## Sheet: Ore samples
		Elements/oxides	Al2O3	Ba	CaO	Ce	Cr	Dy	Er	Eu	Fe2O3	Gd	Hf	Ho	K2O	La	Lu	MgO	MnO	Na2O	Nb	Nd	P2O5	Pb	Pr	Sc	SiO2	Sm	Sn	Ta	Tb	Th	TiO2	Tm	U	W	Y	Yb	Zr	LOI	Ag	As	Ba	Be	Bi	Cd	Co	Cs	Cu
		Units	%	ppm	%	ppm	ppm	ppm	ppm	ppm	%	ppm	ppm	ppm	%	ppm	ppm	%	%	%	ppm	ppm	%	ppm	ppm	ppm	%	ppm	ppm	ppm	ppm	ppm	%	ppm	ppm	ppm	ppm	ppm	ppm	%	ppm	ppm	ppm	ppm	ppm	ppm	ppm	ppm	ppm
		DL	0.01	1	0.01	0.1	1	0.05	0.05	0.05	0.01	0.05	1	0.05	0.01	0.1	0.05	0.01	0.01	0.01	1	0.1	0.01	1	0.05	1	0.01	0.1	1	0.5	0.05	0.1	0.01	0.05	0.05	1	1	0.1	5	0.01	0.01	0.5	0.2	0.2	0.1	0.05	0.2	0.1	0.2
		Method	AF02																																					LOI	MMA04
Hole ID	Depth (m)	Lab no.
DKRC0051	155 - 156	07-36212	13.1	170	10.29	7.1	271	2.78	1.81	0.7	10.69	2.31	1	0.6	0.65	2.7	0.27	6.96	0.15	1.67	2	5.1	0.04	1	1.12	34	44.13	1.8	1	< 0.5	0.46	0.3	0.74	0.26	0.07	2	16	1.7	46	11.58	0.05	88.2	159	0.7	< 0.1	0.11	60.1	0.9	105.2
DKRC0051	156 - 157	07-36213	8.7	30	10.73	9.2	140	3.13	2.09	0.97	17.53	2.65	1	0.68	0.23	3.6	0.3	5.26	0.14	1.06	2	6.4	0.06	11	1.4	20	48.09	2.1	3	< 0.5	0.51	0.4	0.69	0.3	0.13	9	18	1.9	48	7.51	2.6	313	32.4	0.7	0.4	0.23	67.9	0.5	401.8
DKRC0051	157 - 158	07-36214	13	106	6.46	10.2	189	4.22	2.72	1.1	15.57	3.54	2	0.91	0.76	3.7	0.39	6.63	0.14	2.21	3	7.9	0.12	10	1.64	35	47.54	2.8	4	< 0.5	0.7	0.3	1.14	0.42	0.1	5	23	2.6	69	6.4	18	365	98.9	0.6	0.4	< 0.05	83.8	0.8	349.7
[truncated: 20 more columns]

## Sheet: QAQC duplicates
Element	Al2O3	CaO	Ce	Cr	Dy	Er	Eu	Fe2O3	Gd	Hf	Ho	K2O	La	Lu	MgO	MnO	Na2O	Nb	Nd	P2O5	Pb	Pr	Sc	SiO2	Sm	Tb	Th	TiO2	Tm	U	W	Y	Yb	Zr	LOI		Ag	As	Ba	Be	Bi	Cd	Co	Cs	Cu	Ga	Ge	Hg	In
DL	0.01	0.01	0.1	1	0.05	0.05	0.05	0.01	0.05	1	0.05	0.01	0.1	0.05	0.01	0.01	0.01	1	0.1	0.01	1	0.05	1	0.01	0.1	0.05	0.1	0.01	0.05	0.02	1	1	0.1	5	0.01		0.01	0.5	0.2	0.05	0.01	0.05	0.2	0.1	0.2	0.05	0.05	0.05	0.005
Duplicates
07-36137	11.82	1.14	29.4	108	2.16	1.3	0.76	4.24	2.46	4	0.44	2.1	14.7	0.17	1.28	0.11	2.68	4	13.8	0.14	13	3.71	9	71.28	2.7	0.36	3.6	0.45	0.2	1.03	2	13	1.3	142	4.74	07-36136	0.08	5.5	553	4.58	0.15	0.12	63.8	1.6	36.8	13.7	0.44	X	0.032
07-36137rpt	11.95	1.21	29.1	118	2.2	1.29	0.76	4.22	2.33	4	0.44	2.05	14.5	0.17	1.26	0.11	2.82	4	13.5	0.04	17	3.57	10	71.11	2.7	0.36	3.4	0.45	0.2	1	2	13	1.3	160	4.78	07-36136rpt	0.07	5.8	527	4.6	0.15	0.1	60.7	1.5	35.6	13.8	0.47	X	0.03
difference	0.13	0.07	0.3	10	0.04	0.01	0	0.02	0.13	0	0	0.05	0.2	0	0.02	0	0.14	0	0.3	0.1	4	0.14	1	0.17	0	0	0.2	0	0	0.03	0	0	0	18	0.04	difference	0.01	0.3	26	0.02	0	0.02	3.1	0.1	1.2	0.1	0.03	0	0.002
%difference	1.09382	5.95745	1.02564	8.84956	1.83486	0.772201	0	0.472813	5.42797	0	0	2.40964	1.36986	0	1.5748	0	5.09091	0	2.1978	111.111	26.6667	3.84615	10.5263	0.238781	0	0	5.71429	0	0	2.95567	0	0	0	11.9205	0.840336	%difference	13.3333	5.30973	4.81481	0.43573	0	18.1818	4.97992	6.45161	3.31492	0.727273	6.59341	0	6.45161
%HRD	0.546908	2.97872	0.512821	4.42478	0.917431	0.3861	0	0.236407	2.71399	0	0	1.20482	0.684932	0	0.787402		2.54545	0	1.0989	55.5556	13.3333	1.92308	5.26316	0.11939	0	0	2.85714	0	0		0	0	0	5.96026	0.420168	%HRD	6.66667	2.65487	2.40741	0.217865	0	9.09091	2.48996	3.22581	1.65746	0.363636	3.2967	0	3.22581
07-36155	15.42	10.75	8.6	229	3.42	2.22	0.8	12.67	2.89	2	0.72	1.02	3.1	0.29	5.4	0.16	1.98	2	6.7	0.08	X	1.35	43	43.21	2.2	0.53	0.3	0.95	0.33	0.1	2	19	2.2	56	8.36	07-36159	0.03	16	114	0.57	0.17	X	1.4	0.8	24.2	15.5	0.43	X	0.041
07-36155rpt	14.95	11.08	9.1	231	3.54	2.25	0.81	12.82	2.93	2	0.78	0.97	3.3	0.28	5.36	0.15	1.98	3	7.1	0.07	3	1.4	39	43.95	2.3	0.55	0.3	0.97	0.35	0.09	2	20	2.1	58	7.68	07-36159rpt	0.03	15.7	110	0.57	0.17	X	1.4	0.8	23.6	15.2	0.41	X	0.041
difference	0.47	0.33	0.5	2	0.12	0.03	0.01	0.15	0.04	0	0.06	0.05	0.2	0.01	0.04	0.01	0	1	0.4	0.01	0	0.05	4	0.74	0.1	0.02	0	0.02	0.02	0.01	0	1	0.1	2	0.68	difference	0	0.3	4	0	0	0	0	0	0.6	0.3	0.02	0	0
%difference	3.09516	3.02336	5.64972	0.869565	3.44828	1.34228	1.24224	1.17693	1.37457	0	8	5.02513	6.25	3.50877	0.743494	6.45161	0	40	5.7971	13.3333	0	3.63636	9.7561	1.69803	4.44444	3.7037	0	2.08333	5.88235	10.5263	0	5.12821	4.65116	3.50877	8.4788	%difference	0	1.89274	3.57143	0	0	0	0	0	2.51046	1.9544	4.7619	0	0
%HRD	1.54758	1.51168	2.82486	0.434783	1.72414	0.671141	0.621118	0.588466	0.687285	0	4	2.51256	3.125	1.75439	0.371747		0	20	2.89855	6.66667	0	1.81818	4.87805	0.849013	2.22222	1.85185	0	1.04167	2.94118		0	2.5641	2.32558	1.75439	4.2394	%HRD	0	0.946372	1.78571	0	0		0	0	1.25523	0.977199	2.38095	0	0
07-36172	11	0.62	35	135	3.14	1.93	0.92	2.88	3.37	4	0.65	2.24	17.4	0.3	0.6	0.05	2.69	4	15.8	0.02	14	4.04	10	76.23	3.2	0.5	3.5	0.39	0.26	0.89	1	19	1.7	136	3.26	07-36174	0.06	4.9	881	1.58	0.12	0.11	23.7	3.3	23.4	13.8	0.52	X	0.03
07-36172rpt	10.85	0.76	33.3	140	3.03	1.9	0.92	2.88	3.17	3	0.63	2.26	16.5	0.27	0.64	0.06	2.83	4	14.9	0.07	14	3.86	10	75.91	3.1	0.48	3.6	0.39	0.28	0.9	2	19	1.7	137	3.36	07-36174rpt	0.06	10.1	962	1.62	0.12	0.12	22.5	3.4	24.1	14.2	0.66	X	0.031
difference	0.15	0.14	1.7	5	0.11	0.03	0	0	0.2	1	0.02	0.02	0.9	0.03	0.04	0.01	0.14	0	0.9	0.05	0	0.18	0	0.32	0.1	0.02	0.1	0	0.02	0.01	1	0	0	1	0.1	difference	0	5.2	81	0.04	0	0.01	1.2	0.1	0.7	0.4	0.14	0	0.001
%difference	1.373	20.2899	4.97804	3.63636	3.56564	1.56658	0	0	6.11621	28.5714	3.125	0.888889	5.30973	10.5263	6.45161	18.1818	5.07246	0	5.86319	111.111	0	4.55696	0	0.420665	3.1746	4.08163	2.8169	0	7.40741	1.11732	66.6667	0	0	0.732601	3.02115	%difference	0	69.3333	8.79002	2.5	0	8.69565	5.19481	2.98507	2.94737	2.85714	23.7288	0	3.27869
%HRD	0.686499	10.1449	2.48902	1.81818	1.78282	0.78329	0	0	3.0581	14.2857	1.5625	0.444444	2.65487		3.22581		2.53623	0	2.9316	55.5556	0	2.27848	0	0.210333	1.5873	2.04082	1.40845	0	3.7037	0.558659	33.3333	0	0	0.3663	1.51057	%HRD	0	34.6667	4.39501	1.25			2.5974	1.49254	1.47368	1.42857	11.8644	0	1.63934
07-36195	12.82	0.9	48.1	88	3.15	2.11	1.12	3.16	3.67	4	0.67	2.25	23.6	0.28	1.07	0.06	3.78	6	21.6	0.06	16	5.92	9	71.1	4.1	0.51	5.3	0.4	0.29	1.38	2	21	1.7	153	4.4	07-36210	0.06	X	44.4	0.26	0.02	0.06	55.6	0.3	104.6	12.9	0.46	X	0.06
07-36195rpt	12.96	0.92	47.9	76	3.03	1.87	1.12	3.22	3.53	4	0.62	2.26	23.7	0.27	1.08	0.06	3.85	5	21.5	0.14	16	5.78	9	70.74	4	0.5	5.3	0.39	0.27	1.4	2	20	1.6	140	4.38	07-36210rpt	0.08	X	49.3	0.26	0.02	0.05	57.5	0.3	112.5	12.8	0.47	X	0.063
difference	0.14	0.02	0.2	12	0.12	0.24	0	0.06	0.14	0	0.05	0.01	0.1	0.01	0.01	0	0.07	1	0.1	0.08	0	0.14	0	0.36	0.1	0.01	0	0.01	0.02	0.02	0	1	0.1	13	0.02	difference	0.02	0	4.9	0	0	0.01	1.9	0	7.9	0.1	0.01	0	0.003
%difference	1.08611	2.1978	0.416667	14.6341	3.8835	12.0603	0	1.88088	3.88889	0	7.75194	0.443459	0.422833	3.63636	0.930233	0	1.83486	18.1818	0.464037	80	0	2.39316	0	0.507614	2.46914	1.9802	0	2.53165	7.14286	1.43885	0	4.87805	6.06061	8.87372	0.455581	%difference	28.5714	0	10.4589	0	0	18.1818	3.35986	0	7.27775	0.77821	2.15054	0	4.87805
%HRD	0.543057	1.0989	0.208333	7.31707	1.94175	6.03015	0	0.940439	1.94444	0	3.87597	0.221729	0.211416	1.81818	0.465116	0	0.917431	9.09091	0.232019	40	0	1.19658	0	0.253807	1.23457	0.990099	0	1.26582	3.57143	0.719424	0	2.43902	3.0303	4.43686	0.22779	%HRD	14.2857	0	5.22946	0	0	9.09091	1.67993	0	3.63888	0.389105	1.07527	0	2.43902
07-36212	13.1	10.29	7.1	271	2.78	1.81	0.7	10.69	2.31	1	0.6	0.65	2.7	0.27	6.96	0.15	1.67	2	5.1	0.04	1	1.12	34	44.13	1.8	0.46	0.3	0.74	0.26	0.07	2	16	1.7	46	11.58	07-36214	18	365	98.9	0.64	0.39	X	83.8	0.8	349.7	15.2	0.95	0.61	0.129
07-36212rpt	13.16	10.6	7.6	261	3.05	1.99	0.76	10.69	2.53	1	0.66	0.65	2.8	0.3	7.06	0.17	1.68	2	5.5	0.17	2	1.17	35	43.71	1.9	0.49	0.2	0.74	0.29	0.07	3	17	1.8	48	11.37	07-36214rpt	9.8	419	97.8	0.64	0.35	X	80.3	0.8	377.9	14.4	0.9	0.31	0.114
difference	0.06	0.31	0.5	10	0.27	0.18	0.06	0	0.22	0	0.06	0	0.1	0.03	0.1	0.02		0	0.4	0.13	1	0.05	1	0.42	0.1	0.03	0.1	0	0.03	0	1	1	0.1	2	0.21	difference	8.2	54	1.1	0	0.04	0	3.5	0	28.2	0.8	0.05	0.3	0.015
%difference	0.456969	2.96793	6.80272	3.7594	9.26244	9.47368	8.21918	0	9.09091	0	9.52381	0	3.63636	10.5263	1.42653	12.5		0	7.54717	123.81	66.6667	4.36681	2.89855	0.956284	5.40541	6.31579	40	0	10.9091	0	40	6.06061	5.71429	4.25532	1.83007	%difference	58.9928	13.7755	1.11845	0	10.8108	0	4.26569	0	7.75151	5.40541	5.40541	65.2174	12.3457
%HRD	0.228484	1.48396	3.40136	1.8797	4.63122	4.73684	4.10959	0	4.54545	0	4.7619	0	1.81818	5.26316	0.713267			0	3.77358		33.3333	2.18341		0.478142	2.7027	3.15789	20	0	5.45455	0	20	3.0303	2.85714	2.12766	0.915033	%HRD	29.4964	6.88776	0.559227	0	5.40541	0	2.13285	0	3.87576	2.7027	2.7027	32.6087	6.17284
07-36230	10.17	0.75	39.3	155	2.66	1.77	0.78	7.63	2.82	4	0.57	2.04	16.7	0.22	1.16	0.24	2.44	5	14.7	0.04	15	4.01	10	68.85	2.8	0.44	4.7	0.5	0.26	1.34	2	18	1.6	146	6.19	07-36244	0.04	10.7	108	0.97	0.2	X	7.8	0.7	47.4	18.4	0.41	X	0.043
07-36230rpt	10.25	0.78	36.7	133	2.64	1.68	0.74	7.2	2.78	4	0.55	2.07	15.7	0.23	1.12	0.24	2.49	5	14	0.11	15	3.83	11	68.97	2.8	0.43	4.7	0.49	0.25	1.36	2	17	1.6	148	6.27	07-36244rpt	0.04	10.7	112	1	0.2	X	8	0.8	48.5	18.6	0.39	X	0.053
difference	0.08	0.03	2.6	22	0.02	0.09	0.04	0.43	0.04	0	0.02	0.03	1	0.01	0.04	0	0.05	0	0.7	0.07	0	0.18	1	0.12	0	0.01	0	0.01	0.01		0	1	0	2	0.08	difference	0	0	4	0.03	0	0	0.2	0.1	1.1	0.2	0.02	0	0.01
%difference	0.783546	3.92157	6.84211	15.2778	0.754717	5.21739	5.26316	5.79906	1.42857	0	3.57143	1.45985	6.17284	4.44444	3.50877	0	2.0284	0	4.87805	93.3333	0	4.59184	9.52381	0.17414	0	2.29885	0	2.0202	3.92157		0	5.71429	0	1.36054	1.28411	%difference	0	0	3.63636	3.04569	0	0	2.53165	13.3333	2.29406	1.08108	5	0	20.8333
%HRD	0.391773	1.96078	3.42105	7.63889	0.377358	2.6087	2.63158	2.89953	0.714286	0	1.78571	0.729927	3.08642		1.75439	0	1.0142	0	2.43902	46.6667	0	2.29592	4.7619	0.0870701	0	1.14943	0	1.0101	1.96078		0	2.85714	0	0.680272	0.642055	%HRD	0	0	1.81818	1.52284	0	0	1.26582	6.66667	1.14703		2.5	0	10.4167
07-36245	13.82	0.15	38.2	101	1.36	1.02	0.26	4.49	1.1	5	0.3	0.36	16.2	0.18	0.2	0.01	0.08	6	11.6	0.14	12	4	11	73	1.4	0.19	6.2	0.57	0.17	1.28	2	8	1.3	181	7.18	07-36258	0.06	3.9	647	1.36	0.14	0.14	13.7	2.4	23.2	14.4	0.49	X	0.032
07-36245rpt	13.82	0.16	40.8	111	1.47	1.11	0.27	4.46	1.18	5	0.32	0.37	17.3	0.19	0.22	0.02	0.07	9	12.4	0.09	12	4.22	11	73.09	1.6	0.21	6.3	0.56	0.19	1.32	2	9	1.4	209	7.15	07-36258rpt	0.06	4.8	657	1.42	0.15	0.15	14.8	2.3	23.8	14.4	0.51	X	0.032
difference	0	0.01	2.6	10	0.11	0.09	0.01	0.03	0.08	0	0.02	0.01	1.1	0.01	0.02	0.01	0.01	3	0.8	0.05	0	0.22	0	0.09	0.2	0.02	0.1	0.01	0.02	0.04	0	1	0.1	28	0.03	difference	0	0.9	10	0.06	0.01	0.01	1.1	0.1	0.6	0	0.02	0	0
%difference	0	6.45161	6.58228	9.43396	7.77385	8.4507	3.77358	0.670391	7.01754	0	6.45161	2.73973	6.56716	5.40541	9.52381	66.6667	13.3333	40	6.66667	43.4783	0	5.3528	0	0.123212	13.3333	10	1.6	1.76991	11.1111	3.07692	0	11.7647	7.40741	14.359	0.418702	%difference	0	20.6897	1.53374	4.31655	6.89655	6.89655	7.7193	4.25532	2.55319	0	4	0	0
%HRD	0	3.22581	3.29114	4.71698	3.88693	4.22535	1.88679	0.335196	3.50877	0	3.22581	1.36986	3.28358	2.7027	4.7619		6.66667	20	3.33333	21.7391	0	2.6764	0	0.0616059	6.66667	5	0.8	0.884956	5.55556	1.53846	0	5.88235	3.7037	7.17949	0.209351	%HRD	0	10.3448	0.766871	2.15827	3.44828	3.44828	3.85965	2.12766	1.2766		2	0	0
07-36262	11.97	1.06	30.4	114	2.16	1.34	0.79	4.04	2.45	4	0.45	2.14	14.5	0.2	1.3	0.09	3.04	4	13.4	0.13	14	3.54	11	71.18	2.8	0.36	3.5	0.43	0.19	0.92	1	12	1.3	138	4.61	07-36260	0.29	6.2	750	4.14	0.14	0.16	226	2	57	15.1	0.58	X	0.039
07-36262rpt	11.92	1.07	29.2	115	2.09	1.33	0.75	4.04	2.38	4	0.44	2.05	13.9	0.21	1.32	0.09	3.01	4	13	0.06	13	3.41	12	71.34	2.6	0.35	3.3	0.43	0.21	0.94	X	12	1.3	139	4.66	07-36260rpt	0.28	5.6	730	4.04	0.14	0.15	195	2	53.9	14.4	0.56	X	0.04
difference	0.05	0.01	1.2	1	0.07	0.01	0.04	0	0.07	0	0.01	0.09	0.6	0.01	0.02	0	0.03	0	0.4	0.07	1	0.13	1	0.16	0.2	0.01	0.2	0	0.02	0.02	0	0	0	1	0.05	difference	0.01	0.6	20	0.1	0	0.01	31	0	3.1	0.7	0.02	0	0.001
%difference	0.418585	0.938967	4.02685	0.873362	3.29412	0.749064	5.19481	0	2.89855	0	2.24719	4.29594	4.22535	4.87805	1.52672	0	0.991736	0	3.0303	73.6842	7.40741	3.74101	8.69565	0.22453	7.40741	2.8169	5.88235	0	10	2.15054	0	0	0	0.722022	1.07875	%difference	3.50877	10.1695	2.7027	2.44499	0	6.45161	14.7268	0	5.59062	4.74576	3.50877	0	2.53165
%HRD	0.209293	0.469484	2.01342	0.436681	1.64706	0.374532	2.5974	0	1.44928	0	1.1236	2.14797	2.11268		0.763359		0.495868	0	1.51515	36.8421	3.7037	1.8705	4.34783	0.112265	3.7037	1.40845	2.94118	0	5	1.07527	0	0	0	0.361011	0.539374	%HRD	1.75439	5.08475	1.35135	1.22249	0	3.22581	7.36342	0	2.79531		1.75439	0	1.26582
07-36273	11.51	4.63	23.7	105	2.01	1.29	0.67	4.69	2.22	3	0.45	1.65	12.3	0.17	2.45	0.08	2.5	4	11.3	0.12	11	2.93	14	65.32	2.2	0.37	3.6	0.46	0.18	0.76	2	12	1.2	116	6.6	07-36271	0.07	1.8	475	1.24	0.11	0.07	13.2	1.5	27.6	14.1	0.48	X	0.033
07-36273rpt	11.33	4.78	23	124	2.04	1.34	0.65	5.27	2.08	3	0.44	1.63	12.1	0.2	2.65	0.09	2.46	4	10.9	0.1	11	2.86	16	64.68	2.3	0.37	3.5	0.45	0.2	0.74	2	12	1.3	121	6.56	07-36271rpt	0.05	2.8	464	1.26	0.11	0.07	14.5	1.5	27.4	14.1	0.45	X	0.033
difference	0.18	0.15	0.7	19	0.03	0.05	0.02	0.58	0.14	0	0.01	0.02	0.2	0.03	0.2	0.01	0.04	0	0.4	0.02	0	0.07	2	0.64	0.1	0	0.1	0.01	0.02	0.02	0	0	0.1	5	0.04	difference	0.02	1	11	0.02	0	0	1.3	0	0.2	0	0.03	0	0
%difference	1.57618	3.1881	2.99786	16.5939	1.48148	3.80228	3.0303	11.6466	6.51163	0	2.24719	1.21951	1.63934	16.2162	7.84314	11.7647	1.6129	0	3.6036	18.1818	0	2.41796	13.3333	0.984615	4.44444	0	2.8169	2.1978	10.5263	2.66667	0	0	8	4.21941	0.607903	%difference	33.3333	43.4783	2.34292	1.6	0	0	9.38628	0	0.727273	0	6.45161	0	0
%HRD	0.788091	1.59405	1.49893	8.29694	0.740741	1.90114	1.51515	5.82329	3.25581	0	1.1236	0.609756	0.819672	8.10811	3.92157		0.806452	0	1.8018	9.09091	0	1.20898	6.66667	0.492308	2.22222	0	1.40845	1.0989	5.26316	1.33333		0	4	2.1097	0.303951	%HRD	16.6667	21.7391	1.17146	0.8	0	0	4.69314	0	0.363636	0	3.22581	0	0
07-36295	12.83	3.59	16.1	195	2.51	1.65	0.67	7.24	2.33	2	0.54	1.1	8	0.22	3.3	0.18	2.75	3	9.1	0.04	7	2.13	21	64.88	2	0.41	1.9	0.68	0.24	0.5	X	14	1.6	92	3.4	07-36292	0.04	2.1	250	0.76	0.05	0.07	27.5	0.6	42.5	13.8	0.55	X	0.042
07-36295rpt	12.87	3.52	19.1	186	2.74	1.85	0.76	7.17	2.54	3	0.62	1.13	9.6	0.26	3.12	0.17	2.79	4	10.3	0.08	8	2.44	23	65.21	2.4	0.46	2.1	0.68	0.28	0.55	2	16	1.7	96	3.27	07-36292rpt	0.04	2.3	248	0.73	0.07	0.08	27.5	0.6	43.4	13.8	0.55	X	0.044
difference	0.04	0.07	3	9	0.23	0.2	0.09	0.07	0.21	1	0.08	0.03	1.6	0.04	0.18	0.01	0.04	1	1.2	0.04	1	0.31	2	0.33	0.4	0.05	0.2	0	0.04	0.05	0	2	0.1	4	0.13	difference	0	0.2	2	0.03	0.02	0.01	0	0	0.9	0	0	0	0.002
%difference	0.311284	1.96906	17.0455	4.72441	8.7619	11.4286	12.5874	0.971548	8.62423	40	13.7931	2.69058	18.1818	16.6667	5.60748	5.71429	1.44404	28.5714	12.3711	66.6667	13.3333	13.5667	9.09091	0.507341	18.1818	11.4943	10	0	15.3846	9.52381	0	13.3333	6.06061	4.25532	3.89805	%difference	0	9.09091	0.803213	4.02685	33.3333	13.3333	0	0	2.09546	0	0	0	4.65116
%HRD	0.304384	1.25921	9.05101	4.50621	2.04047	1.52922	0.678865	0.852458	1.91707	2.38095	0.558148	0.791435	6.11111	0.236873	2.02077		0.953734	3.16742	5.5889		4.91803	1.97493	6.64653	0.504685	1.98198	0.420018	1.68067	0	0.256006	0.498812	0	7.31707	1.30538	4.15561	1.7813	%HRD	0	1.78716	0.797438	0.626718	0.0599101	0.0746083	0	0	2.01814	0	0	0	0.0426152
07-36338	13.73	1.58	39.4	X	3.62	2.21	0.95	10.32	3.32	3	0.74	1.97	18.3	0.28	4.41	0.18	2.02	4	17.5	0.04	12	4.3	24	59.67	3.5	0.55	4.8	0.69	0.33	0.82	33	19	2.2	119	5.36	07-36338	0.14	25.6	431	1.27	0.2	0.12	32.7	7.1	61.5	16.3	0.96	X	0.058
07-36338rpt	13.64	1.53	40.5	X	3.62	2.2	0.97	10.31	3.28	3	0.74	1.97	18.9	0.29	4.28	0.18	2.02	4	17.5	0.05	12	4.41	22	59.8	3.4	0.56	5.1	0.68	0.33	0.82	33	19	2.2	102	5.5	07-36338rpt	0.2	25.3	415	1.24	0.2	0.12	31.5	7	59.6	16.2	0.97	X	0.048
difference	0.09	0.05	1.1	0	0	0.01	0.02	0.01	0.04	0	0	0	0.6	0.01	0.13	0	0	0	0	0.01	0	0.11	2	0.13	0.1	0.01	0.3	0.01	0	0	0	0	0	17	0.14	difference	0.06	0.3	16	0.03	0	0	1.2	0.1	1.9	0.1	0.01	0	0.01
%difference	0.657654	3.21543	2.75344	0	0	0.453515	2.08333	0.0969462	1.21212	0	0	0	3.22581	3.50877	2.99194	0	0	0	0	22.2222	0	2.52583	8.69565	0.217628	2.89855	1.8018	6.06061	1.45985	0	0	0	0	0	15.3846	2.57827	%difference	35.2941	1.17878	3.78251	2.39044	0	0	3.73832	1.41844	3.1379	0.615385	1.03627	0	18.8679
%HRD	0.328827	1.60772	1.37672	0	0	0.226757	1.04167	0.0484731	0.606061	0	0	0	1.6129	1.75439	1.49597		0	0	0		0	1.26292	4.34783	0.108814	1.44928	0.900901	3.0303	0.729927	0	0	0	0	0	7.69231	1.28913	%HRD	17.6471	0.589391	1.89125	1.19522	0	0	1.86916	0.70922	1.56895	0.307692	0.518135	0	9.43396
07-36339	13.5	6.01	30.4	X	3.53	2.17	0.96	9.03	3.02	3	0.73	1.45	13.9	0.29	5.95	0.12	2.12	3	14.8	0.06	8	3.42	29	55.24	3.1	0.54	3.2	0.77	0.32	0.6	1	19	2.1	98	5.73	07-36339	0.06	4.3	237	0.99	0.13	0.07	32.9	2.1	69.2	16	0.68	X	0.059
07-36339rpt	13.55	6.03	30	X	3.61	2.24	0.96	9.07	3.12	3	0.75	1.48	13.6	0.3	6.04	0.13	2.11	4	14.8	0.06	8	3.4	29	55.11	3.1	0.55	3.1	0.78	0.33	0.61	1	19	2.1	96	5.62	07-36339rpt	0.06	5.9	248	0.99	0.14	0.07	33.2	2.1	69.9	16.1	0.68	X	0.05
difference	0.05	0.02	0.4	0	0.08	0.07	0	0.04	0.1	0	0.02	0.03	0.3	0.01	0.09	0.01	0.01	1	0	0	0	0.02	0	0.13	0	0.01	0.1	0.01	0.01	0.01	0	0	0	2	0.11	difference	0	1.6	11	0	0.01	0	0.3	0	0.7	0.1	0	0	0.009
%difference	0.369686	0.332226	1.3245	0	2.2409	3.1746	0	0.441989	3.25733	0	2.7027	2.04778	2.18182	3.38983	1.50125	8	0.472813	28.5714	0	0	0	0.58651	0	0.235614	0	1.83486	3.1746	1.29032	3.07692	1.65289	0	0	0	2.06186	1.93833	%difference	0	31.3725	4.53608	0	7.40741	0	0.907716	0	1.00647	0.623053	0	0	16.5138
%HRD	0.184843	0.166113	0.662252	0	1.12045	1.5873	0	0.220994	1.62866	0	1.35135	1.02389	1.09091	1.69492	0.750626		0.236407	14.2857	0		0	0.293255	0	0.117807	0	0.917431	1.5873	0.645161	1.53846	0.826446	0	0	0	1.03093	0.969163	%HRD	0	15.6863	2.26804	0	3.7037	0	0.453858	0	0.503235	0.311526	0	0	8.25688
Duplicate Mean	0.479978	2.29178	2.56258	3.45585	1.7342	2.08838	1.25685	0.995438	2.1691	1.38889	1.94738	0.921367	2.21764	2.59252	1.75266	0	1.47022	5.54534	2.13441	34.0146	4.60737	1.74855	3.35563	0.282937	1.98089	1.48641	2.97612	0.556378	2.93707	0.727823	4.84848	2.0075	1.43518	3.15457	1.08727	Duplicate Mean	7.20974	8.3656	2.03678	0.749451	1.14703	2.49305	2.3671	1.18516	1.79783	0.720048	2.60986	2.71739	3.57441
[truncated: 16 more columns]

## Sheet: QAQC CRM
Element	Al2O3	CaO	Ce	Cr	Dy	Er	Eu	Fe2O3	Gd	Hf	Ho	K2O	La	Lu	MgO	MnO	Na2O	Nb	Nd	P2O5	Pb	Pr	Sc	SiO2	Sm	Sn	Ta	Tb	Th	TiO2	Tm	U	W	Y	Yb	Zr	LOI	Element	Ag	As	Ba	Be	Bi	Cd	Co	Cs	Cu	Ga	Ge
B. CERTIFIED REFERENCE MATERIALS																																						B. CERTIFIED REFERENCE MATERIALS
																																						Element
OREAS-24c	14.62	8.23	40.3	233	4.51	2.22	1.81	11.15	5.46	4	0.83	0.92	19.5	0.24	6.54	0.15	3.26	24	21.3	0.34	3	5.06	20	52.94	5	2	1.5	0.85	3	1.86	0.3	0.78	X	22	1.8	141	N/A
OREAS-24c	15.11	7.83	35.6	232	4.25	2.05	1.62	11.17	4.83	3	0.81	0.91	18.6	0.23	6.42	0.14	3.13	22	20	0.32	3.2	4.69	20	53.12	4.7	1	1.3	0.81	3	1.85	0.28	0.74	2	20	1.6	133	N/A	OREAS-45d	0.22	14.1	181	0.82	0.34	0.05	35.3	4.1	426.8	22.7	1.04
OREAS-24c	14.83	8.32	38	235	4.3	2.06	1.71	10.95	5.03	3	0.81	0.9	18.2	0.21	6.38	0.14	3.11	22	20	0.34	2.2	4.74	21	53.2	5	2	1.4	0.77	3	1.82	0.29	0.75	X	21	1.7	133		OREAS-45d	0.19	13.6	183	0.8	0.33	0.05	35.5	4	417.4	21.8	1.02
OREAS-24c	14.42	8.5	40.3	228	4.83	2.32	1.9	11.32	5.43	4	0.85	0.91	18.8	0.26	6.63	0.14	3.54	23	21.4	0.36	3	5.12	21	52.33	5.5	2	1.4	0.85	2.9	1.86	0.3	0.69	X	22	1.7	140	N/A	OREAS-45d	0.21	14.3	182	0.79	0.32	0.05	37	4	457.7	21.6	1.06
Mean	14.745	8.22	38.55	232	4.4725	2.1625	1.76	11.1475	5.1875	3.5	0.825	0.91	18.775	0.235	6.4925	0.1425	3.26	22.75	20.675	0.34	2.85	4.9025	20.5	52.8975	5.05	1.75	1.4	0.82	2.975	1.8475	0.2925	0.74	2	21.25	1.7	136.75	#DIV/0!	Mean	0.206667	14	182	0.803333	0.33	0.05	35.9333	4.03333	433.967	22.0333	1.04
Expected Value	14.4765	8.49497	39.1373		4.55351	2.19901	1.77591	11.1463	5.16055	3.59436	0.839054	0.901662	19.0825	0.248494	6.71057	0.14355	3.26621	23.3029	20.8366	0.357095	2.89636	4.95947	21.61	51.4219	5.15205	1.59188	1.41601	0.824849	2.97676	1.85975	0.29346	0.736524		21.9757	1.75939	140.61		Expected Value		13.8085	183.299	0.793116	0.311702		29.4665	3.91064	371.077	21.2245
difference	0.26849	0.274967	0.587317	232	0.0810114	0.0365143	0.0159143	0.00122857	0.0269457	0.09436	0.0140543	0.00833846	0.3075	0.0134943	0.218067	0.00105	0.00620779	0.552869	0.161614	0.0170948	0.0463556	0.0569686	1.11	1.47558	0.102051	0.15812	0.0160057	0.00484857	0.00176	0.012255	0.00096	0.00347647	2	0.725709	0.0593943	3.85964	#DIV/0!	difference	0.206667	0.1915	1.299	0.0102173	0.018298	0.05	6.46683	0.122693	62.8897	0.808833	1.04
%difference	3.64177	6.27069	2.95694	100	3.496	3.26673	1.77632	0.0220421	1.03887	5.11614	3.29484	1.83263	3.17174	10.3014	6.29465	1.45228	0.379401	4.6351	1.53931	9.13697	3.15053	2.27128	9.77113	5.579	3.88464	18.0709	2.23542	1.16876	0.118179	1.30929	0.65213	0.939587	100	6.39351	6.53119	5.34319	#DIV/0!	%difference	100	2.73571	1.40738	2.54373	11.0897	100	35.9935	6.08397	28.9836	7.34191	100
%HRD	0.918808	1.64504	0.756001		0.897533	0.837193	0.450076	0.00551083	0.260394	1.33007	0.844581	0.460266	0.812256	2.79099	1.65164	0.367069	0.095121	1.20051	0.389323	2.45229	0.806695	0.577659	2.63595	1.41448	1.0003	4.73147	0.568384	0.294773	0.0295711	0.330568	0.163834	0.23545		1.67888	1.7169	1.39156	#DIV/0!	%HRD		0.688638	0.355599	0.640004	2.85148		9.88815	1.54448	7.81196	1.8698
OREAS-24P	13.22	7.71	40.8	234	4.85	2.35	1.85	11.5	5.65	4	0.89	0.83	19.7	0.25	7.25	0.15	3.38	22	21.9	0.35	2.5	5.26	19	52.77	5.4	2	1.4	0.86	2.8	1.84	0.31	0.7	X	24	1.9	149	N/A	OREAS-45e	0.28	19.4	266	0.61	0.28	0	58.1	1.2	762.2	15.8	1.14
OREAS-24P	14.39	8.7	37	229	4.43	2.08	1.66	11.44	5.03	3	0.81	0.83	17.8	0.23	6.54	0.14	3.05	20	19.6	0.28	2.6	4.69	17	51.78	5	2	1.1	0.77	2.8	1.84	0.28	0.72	X	22	1.7	132	N/A	OREAS-45e	0.28	19.2	237	0.56	0.28	0	63.5	1.2	750.1	14.9	1.06
Mean	13.805	8.205	38.9	231.5	4.64	2.215	1.755	11.47	5.34	3.5	0.85	0.83	18.75	0.24	6.895	0.145	3.215	21	20.75	0.315	2.55	4.975	18	52.275	5.2	2	1.25	0.815	2.8	1.84	0.295	0.71	#DIV/0!	23	1.8	140.5	#DIV/0!	Mean	0.28	19.3	251.5	0.585	0.28	0	60.8	1.2	756.15	15.35	1.1
Expected Value	14.4736	8.49314	37.6	250	4.6	2.2	1.6	11.3947	5.3		0.8	0.84322	17.4	0.2	6.84795	0.142032	3.11388	21	19.9	0.31163	2.9	4.7		51.7711	4.7	2		0.81	2.85	1.83491	0.3	0.75		22.9	1.83	141	142	Expected Value	0.31134	16.3098	252.423	0.621157	0.279463	0	57.0458	1.26265	780.32	16.4755
difference	0.66857	0.288144	1.3	18.5	0.04	0.015	0.155	0.075291	0.04	3.5	0.05	0.01322	1.35	0.04	0.047047	0.002968	0.10112	0	0.85	0.0033696	0.35	0.275	18	0.50394	0.5	0	1.25	0.005	0.05	0.00509	0.005	0.04	#DIV/0!	0.1	0.03	0.5	#DIV/0!	difference	0.03134	2.9902	0.923	0.036157	0.000537	0	3.7542	0.06265	24.17	1.1255	1.1
%difference	8.83059	6.56268	6.6838	13.7803	1.72414	1.3544	17.6638	1.31283	1.49813	100	11.7647	3.0872	14.4	33.3333	1.36467	4.09379	6.29051	0	8.19277	2.13943	21.5385	11.0553	100	1.92803	19.2308	0	100	1.22699	3.44828	0.553261	3.27869	10.1266	#DIV/0!	0.869565	3.22581	0.706714	#DIV/0!	%difference	18.2911	30.9865	0.728648	11.0014	0.383571	0	12.3493	9.45446	6.00878	12.789	100
%HRD	2.36423	1.7256	1.69935	3.84216	0.4329	0.339751	4.61997	0.329289	0.37594		3.0303	0.790093	3.73444	9.09091	0.342335	1.03403	1.59776	0	2.09102	0.537733	6.42202	2.84238		0.484343	5.05051	0		0.307692	0.884956	0.138507	0.840336	2.73973		0.217865	0.826446	0.17762	#DIV/0!	%HRD	5.29983	8.39713	0.183163	2.9977	0.0959849	0	3.18569	2.54401	1.57309	3.53647
OREAS-25a	16.63	0.42	48.9	118	4.19	2.7	0.77	9.88	3.67	11	0.89	0.63	22	0.42	0.52	0.06	0.17	26	18.5	0.1	22	5.16	13	56.29	3.7	4	1.9	0.66	16.8	1.98	0.44	3.52	3	25	2.8	388	12.74	OREAS-25a	0.21	10.2	152	1	0.3	0.08	7.9	6.4	35.4	25.7	0.92
OREAS-25a	17.91	0.42	51.9	125	4.46	2.93	0.85	9.29	4.12	12	1	0.59	25.7	0.47	0.52	0.06	0.17	29	21.8	0.13	22	5.73	14	56.14	4.2	4	2.2	0.75	16.4	1.85	0.47	3.42	3	27	3	452	12.87	OREAS-25a	0.21	10.6	155	0.89	0.35	0.06	7.1	6.4	32.1	25.6	0.97
OREAS-25a	17.85	0.42	X	120	X	X	X	9.54	X	X	X	0.65	X	X	0.56	0.06	0.18	X	X	0.06	21	X	13	55.71	X	5	X	X	16.5	1.91	X	3.54	X	X	X	X	13.3	OREAS-25a	0.22	9.9	161	0.94	0.36	0.13	8.1	6.5	33.6	26.2	1.07
OREAS-25a	17.78	0.42	54.2	128	4.48	2.87	0.87	9.67	3.98	11	0.97	0.61	24.7	0.5	0.57	0.07	0.15	28	20.7	0.13	22	5.78	14	55.94	4.2	5	2.1	0.7	18.8	1.92	0.45	3.78	3	26	3.1	415	13.03	OREAS-25a	0.23	10.1	156	0.943333	0.336667	0.09	7.7	6.43333	33.7	25.8333	0.986667
Mean	17.5425	0.42	51.6667	122.75	4.37667	2.83333	0.83	9.595	3.92333	11.3333	0.953333	0.62	24.1333	0.463333	0.5425	0.0625	0.1675	27.6667	20.3333	0.105	21.75	5.55667	13.5	56.02	4.03333	4.5	2.06667	0.703333	17.125	1.915	0.453333	3.565	3	26	2.96667	418.333	12.985	Mean	0.2175	10.2	156	0.943333	0.336667	0.09	7.7	6.43333	33.7	25.8333	0.986667
Expected Value	17.4787	0.4228	50.751	124.934	4.30812	2.76317	0.801227	9.60067	3.79262	11.1183	0.919837	0.594438	23.2635	0.448779	0.537522	0.0636466		26.4515	19.9859	0.113141		5.3333	13.4948	55.3081	3.89735	4.82955	1.99056	0.655356	16.4156	1.90345	0.434817	3.51361		25.1442	2.88676	397.7	11.7	Expected Value			147	1.02	0.35		8.2	6.46	33.9	25.9
difference	0.0638275	0.00280031	0.915667	2.18364	0.068543	0.0701651	0.0287731	0.0056654	0.130718	0.215034	0.0334963	0.025562	0.869848	0.0145543	0.00497785	0.0011466	0.1675	1.21513	0.347429	0.00814131	21.75	0.223364	0.00517221	0.711917	0.135986	0.329552	0.0761057	0.0479772	0.709429	0.0115459	0.0185163	0.0513893	3	0.855757	0.0799056	20.633	1.285	difference	0.2175	10.2	9	0.0766667	0.0133333	0.09	0.5	0.0266667	0.2	0.0666667	0.986667
%difference	0.72769	1.31593	3.54452	3.43563	3.1322	4.95283	6.93327	0.117951	6.6636	3.79471	7.0272	8.24581	7.20869	6.28243	1.83515	3.53927	100	8.78408	3.41734	13.4254	100	8.03951	0.0766254	2.54165	6.74308	12.7756	7.36507	13.6428	8.2853	1.20584	8.16897	2.88299	100	6.58275	5.38689	9.86436	19.7921	%difference	100	100	11.5385	13.9818	7.33945	100	11.4943	0.822199	1.17302	0.513479	100
%HRD	0.182254	0.332262	0.894051	0.881624	0.789231	1.25373	1.76389	0.0295139	1.69412	0.957764	1.78822	2.10484	1.83525	1.59567	0.460903	0.908945		2.24533	0.861696	3.73213		2.0511	0.01916	0.639476	1.71468	3.53234	1.87581	3.53114	2.11514	0.302371	2.08482	0.72598		1.67322	1.36511	2.52844	5.20559	%HRD			2.9703	3.90492	1.94175		3.14465	0.206825	0.295858	0.128866
OREAS-27	15.41	1.91	97.8	6	3.63	0.98	1.33	3.68	5.98	7	0.5	3.81	49	0.07	0.2	0.05	4.3	20	40.5	0.07	25	11.1	5	70.38	7.9	5	1.5	0.77	16.4	0.19	0.1	5.93	2	15	0.5	276	N/A	OREAS-45e	0.28	19.4	266	0.61	0.28	0	58.1	1.2	762.2	15.8	1.14
OREAS-27	14.63	1.81	109	3	4.03	1.09	1.55	3.78	6.64	8	0.53	3.92	53	0.08	0.24	0.05	3.83	21	44.5	0.06	25	12.4	4	71.49	8.7	4	1.6	0.87	15.6	0.19	0.11	5.81	2	17	0.6	297	N/A	OREAS-45e	0.28	18.6	237	0.56	0.28	0	63.5	1.2	750.1	14.9	1.06
Mean	15.02	1.86	103.4	4.5	3.83	1.035	1.44	3.73	6.31	7.5	0.515	3.865	51	0.075	0.22	0.05	4.065	20.5	42.5	0.065	25	11.75	4.5	70.935	8.3	4.5	1.55	0.82	16	0.19	0.105	5.87	2	16	0.55	286.5		Mean	0.28	19	251.5	0.585	0.28	0	60.8	1.2	756.15	15.35	1.1
Expected Value	14.6641	1.89385	104.308		3.8818	1.04587	1.59932	3.64407	6.76857	7.7948	0.523859	3.88532	52.4864	0.0666136	0.215379	0.0473265	3.85144	20.7803	42.5004	0.0592786		11.8739	4.09236	68.7029	8.14053	4.41016	1.56582	0.84094	16.0542	0.185073	0.108719	5.76941		16.4071	0.571162	289.045		Expected Value	0.31134	16.3098	252.423	0.621157	0.279463	0	57.0458	1.26265	780.32	16.4755
difference	0.355893	0.0338512	0.9083	4.5	0.0518	0.0108714	0.159322	0.0859333	0.458573	0.294795	0.00885909	0.0203174	1.48642	0.00838636	0.00462083	0.00267347	0.21356	0.280264	0.000373684	0.00572143	25	0.123933	0.407636	2.23212	0.159468	0.0898409	0.0158211	0.02094	0.0541818	0.00492745	0.00371905	0.100586	2	0.407075	0.0211619	2.54494		difference	0.03134	2.6902	0.923	0.036157	0.000537	0	3.7542	0.06265	24.17	1.1255	1.1
%difference	4.73893	3.51207	1.72653	100	2.63372	2.05754	18.1188	4.60769	12.6903	7.28826	3.326	1.04041	5.50803	22.3636	4.20076	10.6939	10.5072	2.66151	0.00175848	17.6044	100	2.06592	18.1171	6.29343	3.84261	3.99293	2.00059	4.85915	0.672717	5.18679	6.61528	3.42713	100	4.84205	7.14538	1.74556		%difference	18.2911	28.3179	0.728648	11.0014	0.383571	0	12.3493	9.45446	6.00878	12.789	100
%HRD	1.19894	0.901772	0.437296		0.671698	0.522446	5.24203	1.16535	3.50629	1.92742	0.852771	0.262149	1.43634	5.922	1.06134	2.74691	2.69767	0.678929	0.000439627	4.60371		0.524609	4.74416	1.59851	0.96997	1.0083	0.507765	1.26073	0.169032	1.31373	1.74016	0.864188		1.25613	1.8875	0.442179		%HRD	5.29983	7.61885	0.183163	2.9977	0.0959849	0	3.18569	2.54401	1.57309	3.53647
OREAS-45d	15.35	0.26	38.2	493	3.31	2.04	0.68	21.07	2.88	9	0.66	0.52	17.3	0.31	0.42	0.06	0.13	18	14.6	0.1	21	4.01	52	49.17	3.1	3	1.3	0.51	15.4	1.41	0.31	3.12	2	18	2.2	346	9.98	OREAS-45d	0.22	16.1	181	0.82	0.34	0.05	35.3	4.1	426.8	22.7	1.04
OREAS-45d	15.82	0.27	34.4	521	3.04	1.93	0.62	20.56	2.57	8	0.64	0.5	17	0.3	0.41	0.06	0.14	17	14.1	0.1	21	3.8	54	49.06	2.9	3	1.3	0.51	15.2	1.39	0.31	3.11	2	16	2	327	11.58	OREAS-45d	0.19	13.6	183	0.8	0.33	X	35.5	4	417.4	21.8	1.02
OREAS-45d	15.37	0.28	34.2	570	3.1	2	0.62	20.77	2.82	9	0.67	0.52	16.8	0.31	0.44	0.07	0.13	17	13.8	0.09	21	3.77	49	49.23	2.8	3	1.4	0.51	15.1	1.42	0.31	3.04	2	17	2.1	343	N/A	OREAS-45d	0.21	14.3	182	0.79	0.32	0.05	37	4	457.7	21.6	1.06
OREAS-45d	15.49	0.26	X	496	X	X	X	21.17	X	X	X	0.53	X	X	0.4	0.06	0.13	X	X	0.09	20	X	51	48.55	X	3	X	X	15.3	1.46	X	3.14	X	X	X	X	11.51
OREAS-45d	15.88	0.26	37.6	506	3.32	2.14	0.67	20.45	2.92	9	0.69	0.49	17	0.28	0.41	0.06	0.15	18	14.5	0.09	20	3.99	52	49.25	3	3	1.4	0.52	14.9	1.37	0.33	2.9	2	19	2.3	361	11.69
Mean	15.582	0.266	36.1	517.2	3.1925	2.0275	0.6475	20.804	2.7975	8.75	0.665	0.512	17.025	0.3	0.416	0.062	0.136	17.5	14.25	0.094	20.6	3.8925	51.6	49.052	2.95	3	1.35	0.5125	15.18	1.41	0.315	3.062	2	17.5	2.15	344.25	11.19	Mean	0.206667	14.6667	182	0.803333	0.33	0.05	35.9333	4.03333	433.967	22.0333	1.04
Expected Value	15.6073	0.264	38		3.23	2.03	0.67	21.38	2.83	8.9	0.68	0.51	17.3		0.421	0.066	0.125	17.5	14.5	0.099	21.8	3.94	49	49.63	3.17	2.78	1.02	0.4	14.5	1.49	0.27	2.63	1.62	17.8	2.17	333	9.37	Expected Value		13.8	183	0.79	0.31		29.5	3.91	371	21.2
difference	0.02527	0.002	1.9	517.2	0.0375	0.0025	0.0225	0.576	0.0325	0.15	0.015	0.002	0.275	0.3	0.005	0.004	0.011	0	0.25	0.005	1.2	0.0475	2.6	0.578	0.22	0.22	0.33	0.1125	0.68	0.08	0.045	0.432	0.38	0.3	0.02	11.25	1.82	difference	0.206667	0.866667	1	0.0133333	0.02	0.05	6.43333	0.123333	62.9667	0.833333	1.04
%difference	0.3233	1.50376	9.52381	100	2.29533	0.246002	6.49819	5.24686	2.27074	3.31492	4.31655	0.78125	3.12945	100	2.34742	11.4286	16.1765	0	3.38983	9.61538	10.4348	2.38245	10.0775	2.30242	12.9794	14.6667	48.8889	43.9024	8.95916	10.1911	28.5714	28.2169	38	3.31492	1.82648	6.53595	32.529	%difference	100	11.8182	1.08696	3.3195	12.1212	100	35.8071	6.1157	29.0191	7.5643	100
%HRD	0.0810215	0.377358	2.5641		0.583885	0.0616143	1.70778	1.36545	0.577521	0.849858	1.11524	0.195695	0.801165		0.597372	3.125	4.21456	0	0.869565	2.59067	2.83019	0.606447	2.58449	0.58572	3.59477	3.80623	13.9241	12.3288	2.29111	2.75862	7.69231	7.5896	10.4972	0.849858	0.462963	1.66113	8.85214	%HRD		3.0445	0.273973	0.83682			9.83189	1.55266	7.82227	1.92753
OREAS-45e	12.98	0.08	23.4	1070	2.3	1.39	0.57	34.44	2.06	7	0.45	0.41	10.8	0.24	0.26	0.07	0.07	8	9.4	0.15	16	2.5	83	40.16	2.2	2	0.6	0.38	12.3	0.98	0.22	2.36	X	10	1.5	245	9.52	OREAS-461	6.9	31.6	960	2.15	2.46	0.17	10.6	0.8	57.8	54.7	1.74
OREAS-45e	12.71	0.11	20.1	1060	2.02	1.34	0.51	35.68	1.75	6	0.45	0.38	9.9	0.2	0.26	0.07	0.07	7	8.3	0.12	17	2.27	89	40.11	1.9	1	0.5	0.34	12.4	0.96	0.19	2.41	X	9	1.4	228	N/A	OREAS-461	7.5	34.5	932	2.11	2.64	0.18	10.8	0.8	44.6	58.6	1.77
OREAS-45e	12.57	0.09	24.4	1120	2.33	1.37	0.56	33.91	2.09	6	0.45	0.42	10.6	0.25	0.28	0.07	0.12	8	9.5	0.09	17	2.63	87	41.91	2.3	1	0.6	0.38	12.7	1.01	0.21	2.48	X	10	1.5	241	10.4	OREAS-461	7.7	28.5	927	2.13	2.57	0.19	10.2	0.7	55	42	1.69
OREAS-45e	12.77	0.1	24.6	1040	2.31	1.47	0.59	35.29	2.09	7	0.49	0.42	11.1	0.23	0.29	0.08	0.09	8	9.1	0.04	16	2.64	82	40.43	2.1	1	0.7	0.41	12	0.97	0.23	2.31	1	10	1.5	264	N/A
Mean	12.7575	0.095	23.125	1072.5	2.24	1.3925	0.5575	34.83	1.9975	6.5	0.46	0.4075	10.6	0.23	0.2725	0.0725	0.0875	7.75	9.075	0.1	16.5	2.51	85.25	40.6525	2.125	1.25	0.6	0.3775	12.35	0.98	0.2125	2.39	1	9.75	1.475	244.5	9.96	Mean	7.36667	31.5333	939.667	2.13	2.55667	0.18	10.5333	0.766667	52.4667	51.7667	1.73333
Expected Value	12.8108	0.09	23.5	1067	2.28	1.41	0.55	35.46	2	6.31	0.46	0.405	11.1	0.23	0.268	0.072	0.078	7.4	9.46	0.081		2.5	91	40.13	2.13		0.63	0.36	13	0.989	0.22	2.54	1.06	10.6	1.48	242	8.69	Expected Value		33.5537	957.098	2.09132	2.42688	0	12.1248	0.768867	55.8138	45.5202	0
difference	0.05331	0.005	0.375	5.5	0.04	0.0175	0.0075	0.63	0.0025	0.19	0	0.0025	0.5	2.77556e-17	0.0045	0.0005	0.0095	0.35	0.385	0.019	16.5	0.01	5.75	0.5225	0.005	1.25	0.03	0.0175	0.65	0.009	0.0075	0.15	0.06	0.85	0.005	2.5	1.27	difference	7.36667	2.02037	17.4318	0.0386772	0.129782	0.18	1.59147	0.00220032	3.34717	6.24642	1.73333
%difference	0.828817	10.5263	3.14136	1.02564	3.44828	2.45184	2.69058	3.49127	0.249688	5.84615	0	1.22699	8.62069	2.41353e-14	3.30275	1.37931	21.7143	9.03226	7.82123	38	100	0.796813	11.8863	2.57057	0.468384	100	9.09091	9.27152	9.52381	1.80361	6.59341	11.1524	10.7143	14.8472	0.673401	2.04499	25.502	%difference	100	11.3587	3.57747	3.63167	10.1524	200	23.2056	0.570721	11.3155	24.133	200
%HRD	0.2085	2.7027	0.80429	0.257069	0.884956	0.624442	0.677201	0.896287	0.0625391	1.48322	0	0.307692	2.30415	6.03382e-15	0.832562	0.346021	5.74018	2.31023	2.07715	10.4972		0.199601	3.26241	0.646799	0.117509		2.43902	2.37288	2.5641	0.457085	1.7341	3.0426	2.91262	4.1769	0.169205	0.513875	6.80965	%HRD		3.10411	0.919027	0.916235	2.60421		7.02384	0.143294	3.0912	6.42062
CRM Mean	0.825625	1.28079	1.19251	1.66028	0.710034	0.60653	2.41016	0.631899	1.07947	1.30967	1.27185	0.68679	1.8206	3.87991	0.824357	1.42133	2.86906	1.0725	1.0482	4.06896	3.35297	1.13363	2.64924	0.894887	2.07462	2.61567	3.86301	3.34933	1.34232	0.883481	2.37593	2.53292	6.70493	1.64214	1.07135	1.11914	#DIV/0!	CRM Mean	5.29983	4.57064	0.814204	2.0489	1.51788	N/A	6.04332	1.42255	3.69458	2.90329	N/A
[truncated: 17 more columns]

## Sheet: Heavy minerals
Drill hole	Depth	Sample	Total Weight	>1 mm	45µm - 1mm	H.M. WT	>1 mm	SLIMES (<45µm)	H.M.
Number	m	Number	grams	grams	grams	grams	%	%	%
DKRC0050	49-50	07-36300	529.32	0.03	330.92	1.16	0.01	37.48	0.22
DKRC0051	50-51	07-36301	540.88	0	261.92	1.81	0	51.58	0.33
DKRC0052	53-54	07-36302	504.85	0.02	250.25	0.74	0	50.43	0.15
DKRC0053	45-46	07-36303	527.84	0.82	268.55	2.34	0.16	48.97	0.44
DKRC0054	52-53	07-36304	512.77	2.83	264.47	2.23	0.55	47.87	0.43
DKRC0055	37-38	07-36305	503.36	1.04	148.12	17.33	0.21	70.37	3.44
DKRC0056	49-50	07-36306	514.15	1.75	276.28	4.11	0.34	45.92	0.8
DKRC0057	45-46	07-36307	523.4	0.04	271.66	1.2	0.01	48.09	0.23
DKRC0058	47-48	07-36308	508.84	0.11	226.77	0.87	0.02	55.41	0.17
DKRC0059	49-50	07-36309	498.43	0.21	292.46	1.72	0.04	41.28	0.35
DKRC0060	55-56	07-36310	520.71	0.7	181.54	0.62	0.13	65	0.12
DKRC0061	47-48	07-36311	530.26	2.39	265.67	8.41	0.45	49.45	1.59
DKRC0062	36-37	07-36312	504.84	1.63	209.18	10.46	0.32	58.24	2.07
DKRC0063	41-42	07-36313	507.45	2.46	242.52	2.72	0.48	51.72	0.54
DKRC0064	37-38	07-36314	505.97	1.89	207.05	18.27	0.37	58.71	3.61
DKRC0065	46-47	07-36315	526.98	2.21	275.26	10.57	0.42	47.35	2.01
DKRC0066	43-44	07-36316	537.9	1.57	218.18	16.25	0.29	59.15	3.02
DKRC0067	38-39	07-36317	508.92	0.76	255	3.79	0.15	49.74	0.74
DKRC0068	47-48	07-36318	520.73	2.92	273.45	9.7	0.56	46.93	1.86
DKRC0069	50-51	07-36320	516.71	0.81	248.01	2.8	0.16	51.85	0.54
DKRC0070	47-48	07-36321	539.53	0.06	314.33	2.88	0.01	41.73	0.53
DKRC0094	36-37	07-36322	524.17	0.15	207.63	3.07	0.03	60.36	0.59
DKRC0095	39-40	07-36323	502.52	0.37	224.65	4.52	0.07	55.22	0.9
DKRC0096	43-44	07-36324	506.55	0.88	163.22	1.96	0.17	67.6	0.39
DKRC0097	45-46	07-36325	508.13	0.71	129.09	0.62	0.14	74.46	0.12
DKRC0098	37-38	07-36326	508.56	1.84	195.29	17.07	0.36	61.24	3.36
DKRC0099	36-38	07-36327	527.33	1.63	261.21	3.97	0.31	50.16	0.75
DKRC0100	26-27	07-36328	512.01	0.17	264.14	1.73	0.03	48.38	0.34
DKRC0101	50-51	07-36329	517.1	0.24	326.12	2.28	0.05	36.89	0.44
DKRC0124	46-48	07-36330	537.65	2.89	213.61	5.17	0.54	59.73	0.96
DKRC0125	46-47	07-36331	501.47	0.12	205	4.03	0.02	59.1	0.8
DKRC0126	47-48	07-36332	507.56	0.09	282.62	2.68	0.02	44.3	0.53
DKRC0127	47-48	07-36333	522.53	0.48	380.21	2.78	0.09	27.14	0.53
DKRC0051	155 - 156	07-36334	532.12	3.71	274.57	3.92	0.7	47.7	0.74
DKRC0051	156 - 157	07-36335	520.19	2.13	329.18	52.25	0.41	36.31	10.04
DKRC0051	157 - 158	07-36336	501.01	4.15	276.11	35.23	0.83	44.06	7.03
