# Supplementary material
Source: MDPI journal article supplement (https://www.mdpi.com/2075-163X/11/10/1131)
Supplement: s1 [file s1 › Table S2.xlsx]

## Sheet: XRD
Table S2: Semi-quantified XRD analysis of selected samples of the Permian cover and the gold mineralization of drill holes DKRC0050, DKRC0051 and DKRC0061.
Drill hole	Depth	Lithology	Quartz	Kaolinite	Muscovite	Chlorite	Microcline	Goethite	Hematite	Montmorillonite	Albite	Actinolite	Calcite	Pyrite	Gpsum
DKRC0050	0-1	Soil	19.7	17.2	33.1	16.9	11.1	2.05
	2-3	Tertiary clays	30.5	14.2	35.7		19.6
	4-5		26.1	12.6	42.5		18.9
	6-7		26.1	11.7	39.4		22.8
	8-9		37.1	7.47	38.2		17.3
DKRC0061	0-1	Strongly ferruginized diamictites	29.4	30.4		18.5	13.3	5.83	2.6
	2-3		36.4	52.4	5.06			4.24	1.9
	4-5		36	32.6	31.3
	6-7		35.7	24	36.4			3.92
	8-9		18.7	49.2	22.1			10
	10-11		38.5	35.8	17.7			8.05
	12-13		56.4	25	18.7
	14-15		30.2	21.8	42.5			5.5
	16-17		35.8	27.2	33.4			3.7
	18-19	Weakly ferruginized diamictites	43.5	14.8	23		18.8
	20-21		23.6	11.9	22.7		41.5			0.2
	22-23		13.6	5.82	9.01		26.3			0.2	45.1
	24-25		30.6	1.13	3.02		28.3			0.1	36.8
	26-27		34.8	1.28	1.71		24				38.2
	28-29		32.2	0.59	4.67		18.6				43.9
	30-31		29.6	1.81	10.4		24.9			0.3	33
	32-33		27.9	1.83		2.71	26.3			0.2	41.1
	34-35		31.6		1.9	2.24	18.7			0.2	45.3
	36-37		30.2		1.88	2.94	28.8			0.2	36
	38-39		20.1		1.97	9.41	27.9				40.6
	40-41	Unweathered calcareous diamictites	8.39		2.05	15.5	24.1				42.7	4.8	2.5
	42-43		26.6		1.87	13	19				32.4	3.8	3.4
	44-45		23		1.73	15.9	20.4				32.5	4	2.6
	46-47		7.05		2.15	9.28	17.5				57.8	3.2	3
	47-48		20.1		13.5	26.2	7.13				23.2	4.6	5.2
	48-49	Barren basalt	5.03		16.3	49.1					17.4	6.4	5.7
	50-51		16.8		18.5	46.6					11.2		7
DKRC0051	155-156	Mineralization	21.1			31.2	5.2				22.5	1.9	9.5	6.2	2.4
	156-157		28.6			22.6	2.9				9.7	1.3	25	5.8	4.5
	157-158		19.2			35.3	4.4				18.5	2.1	19	0.3	1.1
