# Supplementary material
Source: MDPI journal article supplement (https://www.mdpi.com/2075-163X/11/10/1131)
Supplement: s1 [file s1 › Table S3.xlsx]

## Sheet: Percentage of indicator mineral
Table S3: Excel file contains 2 sheets: sheet 1: Semi-quantified TESCAN TIMA mineralogical analysis of heavy mineral concentrates. Values represent the area percent (%) occupied by one mineral of the total area analyzed. The samples (N=36) are from the base of the Permian cover and 3 samples from the gold mineralization.
Primary phases	Drill hole	Depth (m)	Sample Number	Pyrite	Pyrrhotite	Chalcopyrite	Arsenopyrite	Sphalerite	Galena	Pentlandite	Millerite	Cobaltite	Gersdorffite	Bornite	Chalcocite	Covellite	Gold	Scheelite	Total
Permian cover	DKRC0050	49-50	07-36300	3.896	0.068	0.003	0	0.002	0	0	0	0	0	0.001	0.004	0	0	0	3.974
	DKRC0051	50-51	07-36301	31.254	0.772	0.076	0.101	0.025	0	0	0	0	0	0	0	0	0	0	32.228
	DKRC0052	53-54	07-36302	61.669	1.491	0.248	0.125	0.033	0.003	0	0	0	0	0	0	0	0	0	63.569
	DKRC0053	45-46	07-36303	0	0.257	0	0	0	0	0	0	0	0	0	0	0	0	0	0.257
	DKRC0054	52-53	07-36304	27.681	0.307	1.661	1.069	1.113	0.001	0.017	0	0.029	0	0	0.001	0	0	0	31.879
	DKRC0055	37-38	07-36305	0	0.563	0.023	0.029	0	0	0	0	0.322	0	0	0	0	0	0	0.937
	DKRC0056	49-50	07-36306	25.954	0.761	1.339	0.145	0.079	0	0.005	0	0.056	0	0	0	0	0	0.131	28.47
	DKRC0057	45-46	07-36307	5.024	0.299	0.021	0	0.015	0	0	0	0	0	0.001	0	0	0	0	5.36
	DKRC0058	47-48	07-36308	32.526	0.268	0.007	0.029	0	0	0	0	0	0	0.002	0	0	0	0	32.832
	DKRC0059	49-50	07-36309	51.979	0.452	0.007	0.064	0.001	0	0	0	0	0	0.005	0	0	0	0	52.508
	DKRC0060	55-56	07-36310	46.003	0.367	0.173	0.002	0.058	0	0	0	0	0	0	0	0	0	0	46.603
	DKRC0061	47-48	07-36311	23.064	0.195	0.566	0.103	0.107	0	0	0.003	0.673	0	0.019	0.112	0	0	0	24.842
	DKRC0062	36-37	07-36312	0	0	0	0	0	0	0	0	0.003	0	0	0	0	0	0	0.003
	DKRC0063	41-42	07-36313	21.032	2.551	0.283	0.215	0.029	0.001	0.011	0	0.111	0.003	0.089	0.202	0	0	0	24.527
	DKRC0064	37-38	07-36314	0.813	0.003	0.196	0	0	0	0	0	0.002	0	0.006	0.192	0	0	0	1.212
	DKRC0065	46-47	07-36315	27.763	14.571	2.682	1.072	0.029	0	0.005	0	0.052	0	0.013	0.051	0.002	0.003	0	46.243
	DKRC0066	43-44	07-36316	2.346	0.04	0.764	0	0.009	0	0	0	0.655	0	0.008	0	0	0	0	3.822
	DKRC0067	38-39	07-36317	17.98	0.172	0.2	0	0.002	0.002	0	0	0.007	0	0.001	0.023	0	0	0	18.387
	DKRC0068	47-48	07-36318	13.169	0.485	1.933	2.149	0.071	0.001	0	0	0.149	0	0.006	0.008	0	0	0	17.971
	DKRC0069	50-51	07-36320	14.353	0.354	0.975	0.131	0.063	0.006	0.004	0.01	0	0	0.054	0.041	0	0	0	15.991
	DKRC0070	47-48	07-36321	25.872	0.068	1.573	1.88	0.426	0.003	0.004	0	0	0.022	0	0	0	0	0	29.848
	DKRC0094	36-37	07-36322	0.097	0	0	0	0	0	0	0	0	0	0	0	0	0	0	0.097
	DKRC0095	39-40	07-36323	0.469	7.746	0.357	0	0.302	0	0.019	0	0	0	0	0	0	0	0	8.893
	DKRC0096	43-44	07-36324b	22.661	0.049	0.708	0.185	1.666	0.001	0.167	0	0	0.061	0	0	0	0	0	25.498
	DKRC0097	45-46	07-36325	3.646	9.133	0.457	0	0.011	0	0.219	0	0	0	0.015	0	0	0	0	13.481
	DKRC0098	37-38	07-36326	0	0.016	0.043	0	0	0	0	0	0	0	0	0	0	0	0	0.059
	DKRC0099	36-38	07-36327	33.119	4.216	0.839	0	0	0	0	0	0	0	0.235	0.181	0.002	0	0	38.592
	DKRC0100	26-27	07-36328	0.003	0.289	0.03	0	0	0	0	0	0	0	0	0	0	0	0	0.322
	DKRC0101	50-51	07-36329	18.443	4.291	0.812	0.404	0.333	0.011	0	0	0.003	0	0	0.001	0	0	0	24.298
	DKRC0124	46-48	07-36330	7.969	1.224	2.813	0.027	0.048	0	0.02	0	0.006	0	0	0	0	0	0	12.107
	DKRC0125	46-47	07-36331	0.246	0.511	0.012	0.043	0	0	0.002	0	0	0	0.003	0.002	0	0	0	0.819
	DKRC0126	47-48	07-36332	0.024	0.235	0.292	0.056	0.021	0	0	0	0.002	0	0	0	0	0	0	0.63
	DKRC0127	47-48	07-36333	9.63	0.507	0.443	1.188	0.016	0.004	0	0	0	0	0.003	0	0	0	0	11.791
Ore Zone	DKRC0051	155 - 156	07-36334	24.761	19.883	2.073	0.057	0.23	0.001	0.176	0	2.755	1.253	0	0	0	0	0	51.189
	DKRC0051	156 - 157	07-36335	34.56	34.752	1.577	2.362	0.283	0	0	0	0.002	0.008	0	0	0	0.063	0.014	73.621
	DKRC0051	157 - 158	07-36336	45.605	21.797	1.633	5.108	0.002	0	0	0	0	0	0	0	0	0.745	0	74.89

## Sheet: Numbers of indicator minerals
Table S3: Number of heavy minerals in black colors identified from 33 samples of the base of the Permian cover using TESCAN SEM and TIMA software. These values are for mineral particle counts which include the free grains plus the mineral inclusions. The value of heavy minerals in red colors are mineral particle counts normalized to 500 grams bulk sample weight.
Drill hole	Depth (m)	Sample Number	Total Weight	Pyrite	Pyrite	Pyrrhotite	Pyrrhotite	chalcopyrite	chalcopyrite	Sphalerite	Sphalerite	Pentlandite	Pentlandite	Arsenopyrite	Arsenopyrite	Cobaltite	Cobaltite	Galena	Galena	Gersdorffite	Gersdorffite	Gold	Gold	Scheelite	Scheelite	Bornite	Bornite	Chalcocite	Chalcocite	covellite	covellite
DKRC0050	49-50	07-36300	529.32	429	405.237	198	187.032	7	6.61226	1	0.944608	0	0	0	0	0	0	0	0	0	0	0	0	0	0	0	0	1	0.944608	0	0
DKRC0051	50-51	07-36301	540.88	6317	5839.56	6456	5968.05	166	153.454	28	25.8837	8	7.39536	18	16.6396	1	0.924419	3	2.77326	2	1.84884	0	0	0	0	9	8.31978	0	0	0	0
DKRC0052	53-54	07-36302	504.85	10265	10166.4	11670	11557.9	238	235.714	22	21.7887	14	13.8655	12	11.8847	1	0.990393	6	5.94236	0	0	0	0	1	0.990393	0	0	2	1.98079	0	0
DKRC0053	45-46	07-36303	527.84	76	71.9915	65	61.5717	23	21.7869	4	3.78903	0	0	0	0	0	0	0	0	0	0	1	0.947257	0	0	2	1.89451	0	0	0	0
DKRC0054	52-53	07-36304	512.77	36650	35737.3	28112	27411.9	972	947.793	137	133.588	35	34.1284	19	18.5268	11	10.7261	15	14.6264	3	2.92529	2	1.95019	0	0	0	0	0	0	0	0
DKRC0055	37-38	07-36305	503.36	19245	19116.5	18746	18620.9	113	112.246	2	1.98665	1	0.993325	0	0	5	4.96662	0	0	0	0	0	0	2	1.98665	12	11.9199	14	13.9065	1	0.993325
DKRC0056	49-50	07-36306	514.15	21966	21361.5	13744	13365.7	1879	1827.29	88	85.5781	17	16.5321	73	70.991	7	6.80735	5	4.86239	2	1.94496	8	7.77983	7	6.80735	1	0.972479	0	0	0	0
DKRC0057	45-46	07-36307	523.4	541	516.813	405	386.893	24	22.927	2	1.91058	2	1.91058	0	0	0	0	0	0	0	0	0	0	0	0	4	3.82117	0	0	0	0
DKRC0058	47-48	07-36308	508.84	1394	1369.78	1321	1298.05	48	47.1661	1	0.982627	2	1.96525	2	1.96525	0	0	0	0	0	0	0	0	0	0	7	6.87839	5	4.91314	0	0
DKRC0059	49-50	07-36309	498.43	5380	5396.95	4561	4575.37	104	104.328	11	11.0346	7	7.02205	4	4.0126	1	1.00315	8	8.0252	0	0	0	0	0	0	7	7.02205	12	12.0378	0	0
DKRC0060	55-56	07-36310	520.71	4600	4417.05	2339	2245.97	282	270.784	43	41.2898	2	1.92045	1	0.960227	3	2.88068	5	4.80114	1	0.960227	0	0	0	0	1	0.960227	0	0	0	0
DKRC0061	47-48	07-36311	530.26	13202	12448.6	6283	5924.45	719	677.969	56	52.8043	17	16.0299	8	7.54347	30	28.288	1	0.942934	7	6.60054	2	1.88587	0	0	171	161.242	63	59.4048	4	3.77173
DKRC0062	36-37	07-36312	504.84	565	559.583	369	365.462	20	19.8083	4	3.96165	0	0	0	0	3	2.97124	1	0.990413	0	0	1	0.990413	0	0	11	10.8945	5	4.95206	0	0
DKRC0063	41-42	07-36313	507.45	16939	16690.3	4320	4256.58	337	332.052	61	60.1044	134	132.033	17	16.7504	10	9.85319	4	3.94128	2	1.97064	0	0	0	0	217	213.814	292	287.713	6	5.91191
DKRC0064	37-38	07-36314	505.97	8397	8297.92	4967	4908.39	120	118.584	2	1.9764	5	4.941	17	16.7994	2	1.9764	0	0	0	0	1	0.988201	0	0	32	31.6224	30	29.646	1	0.988201
DKRC0065	46-47	07-36315	526.98	24826	23555	6416	6087.52	574	544.613	59	55.9794	57	54.0817	20	18.9761	23	21.8225	11	10.4368	0	0	2	1.89761	0	0	65	61.6722	80	75.9042	0	0
DKRC0066	43-44	07-36316	537.9	6680	6209.33	3291	3059.12	177	164.529	27	25.0976	21	19.5204	2	1.85908	22	20.4499	0	0	0	0	6	5.57724	0	0	10	9.29541	34	31.6044	0	0
DKRC0067	38-39	07-36317	508.92	2853	2802.99	1508	1481.57	84	82.5277	7	6.87731	2	1.96495	0	0	5	4.91236	8	7.85978	0	0	4	3.92989	0	0	6	5.89484	23	22.5969	0	0
DKRC0068	47-48	07-36318	520.73	12182	11697	3422	3285.77	568	545.388	81	77.7754	14	13.4427	97	93.1385	17	16.3232	12	11.5223	2	1.92038	0	0	0	0	69	66.2531	27	25.9251	1	0.960191
DKRC0069	50-51	07-36320	516.71	6984	6758.14	3302	3195.22	659	637.688	14	13.5473	15	14.5149	9	8.70895	3	2.90298	9	8.70895	0	0	0	0	0	0	148	143.214	50	48.383	3	2.90298
DKRC0070	47-48	07-36321	539.53	13408	12425.6	6865	6362.02	538	498.582	117	108.428	30	27.802	18	16.6812	3	2.7802	15	13.901	3	2.7802	1	0.926733	0	0	0	0	0	0	0	0
DKRC0094	36-37	07-36322	524.17	576	549.44	303	289.028	10	9.53889	0	0	1	0.953889	0	0	0	0	1	0.953889	0	0	6	5.72333	0	0	0	0	0	0	0	0
DKRC0095	39-40	07-36323	502.52	1770	1761.12	483	480.578	121	120.393	9	8.95487	3	2.98496	6	5.96991	1	0.994985	0	0	1	0.994985	7	6.9649	3	2.98496	0	0	0	0	0	0
DKRC0096	43-44	07-36324b	506.55	5660	5586.81	1774	1751.06	149	147.073	76	75.0173	41	40.4698	8	7.89656	0	0	7	6.90949	1	0.987069	0	0	0	0	3	2.96121	0	0	0	0
DKRC0097	45-46	07-36325	508.13	283	278.472	195	191.88	27	26.568	1	0.984	5	4.92	0	0	2	1.968	0	0	0	0	1	0.984	0	0	10	9.84	0	0	0	0
DKRC0098	37-38	07-36326	508.56	174	171.071	45	44.2426	55	54.0742	0	0	0	0	1	0.983168	2	1.96634	0	0	0	0	1	0.983168	0	0	0	0	0	0	0	0
DKRC0099	36-38	07-36327	527.33	277428	263050	93230	88398.2	494	468.397	15	14.2226	0	0	0	0	1	0.948173	2	1.89635	0	0	2	1.89635	0	0	163	154.552	75	71.113	9	8.53356
DKRC0100	26-27	07-36328	512.01	806	787.094	306	298.822	56	54.6864	4	3.90617	2	1.95309	0	0	4	3.90617	0	0	1	0.976543	1	0.976543	0	0	6	5.85926	0	0	0	0
DKRC0101	50-51	07-36329	517.1	16513	15966.9	4258	4117.19	414	400.309	71	68.6521	93	89.9246	11	10.6362	10	9.66931	28	27.0741	0	0	12	11.6032	0	0	28	27.0741	1	0.966931	0	0
DKRC0124	46-48	07-36330	537.65	11281	10491	1968	1830.19	1364	1268.48	69	64.1681	134	124.616	6	5.57984	9	8.36976	1	0.929973	0	0	7	6.50981	0	0	10	9.29973	9	8.36976	0	0
DKRC0125	46-47	07-36331	501.47	1333	1329.09	525	523.461	35	34.8974	1	0.997069	4	3.98827	1	0.997069	2	1.99414	0	0	1	0.997069	2	1.99414	0	0	9	8.97362	8	7.97655	1	0.997069
DKRC0126	47-48	07-36332	507.56	2282	2248.01	167	164.513	101	99.4956	9	8.86595	6	5.91063	7	6.89574	3	2.95532	0	0	0	0	0	0	0	0	4	3.94042	9	8.86595	0	0
DKRC0127	47-48	07-36333	522.53	5366	5134.63	2014	1927.16	269	257.401	9	8.61195	12	11.4826	10	9.56883	12	11.4826	0	0	3	2.87065	0	0	0	0	33	31.5771	13	12.4395	2	1.91377
