# Supplementary material
Source: MDPI journal article supplement (https://www.mdpi.com/2075-163X/11/10/1131)

**Figure S2:** Multielement analyses of three drill holes DKRC0061, DKRC0055 and DKRC0050.

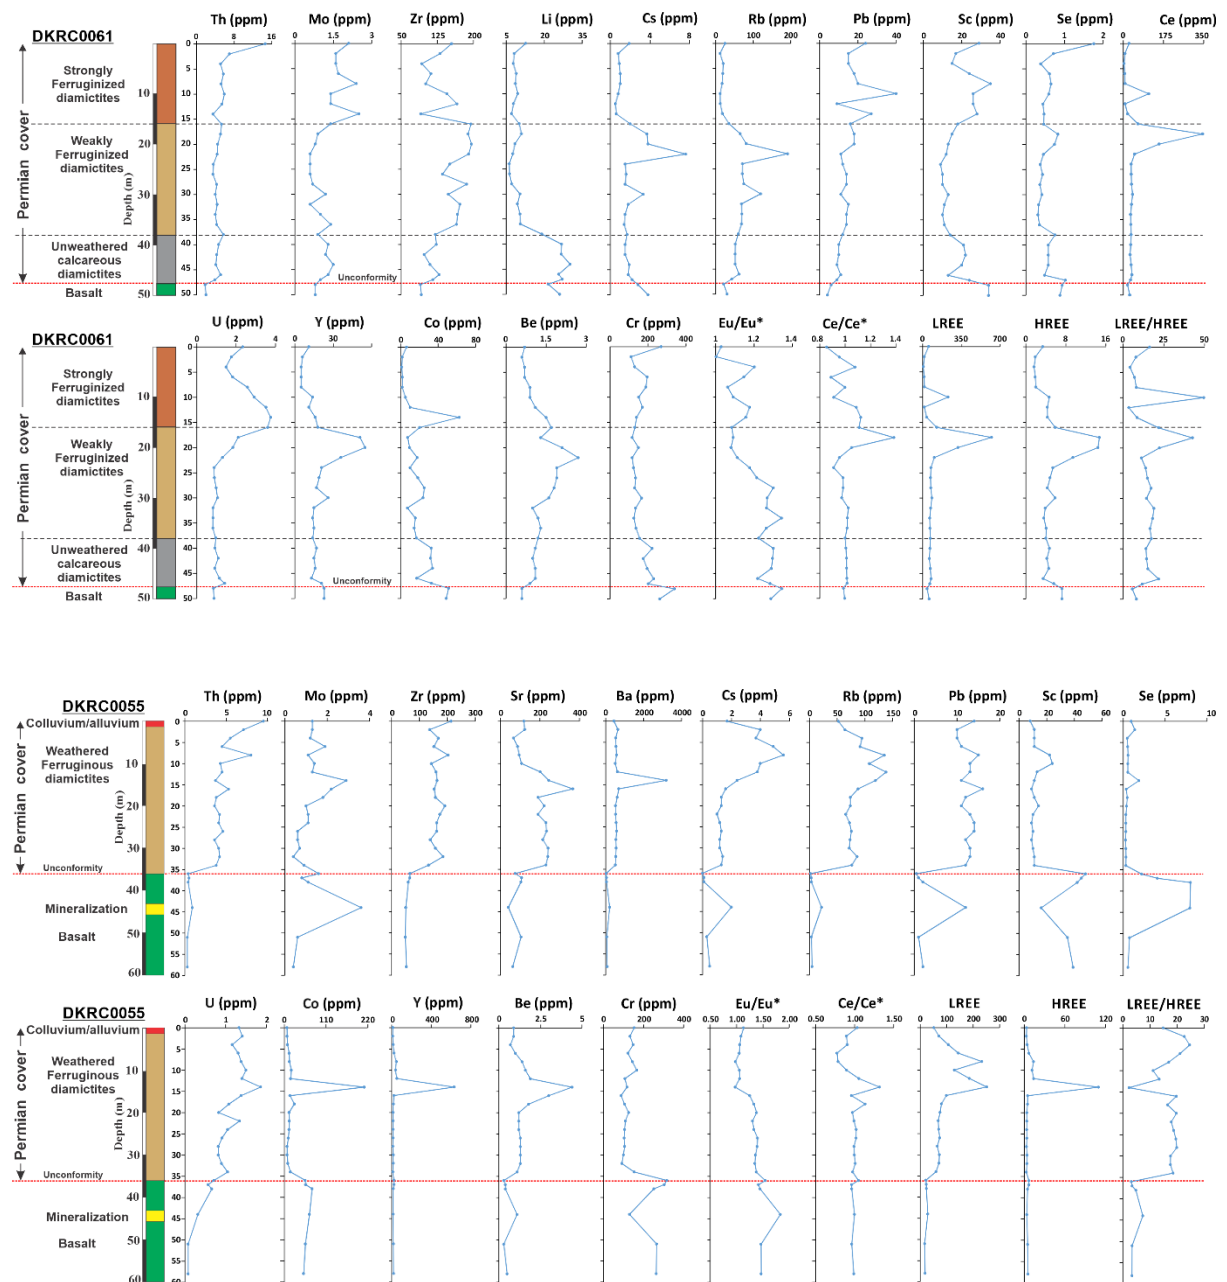

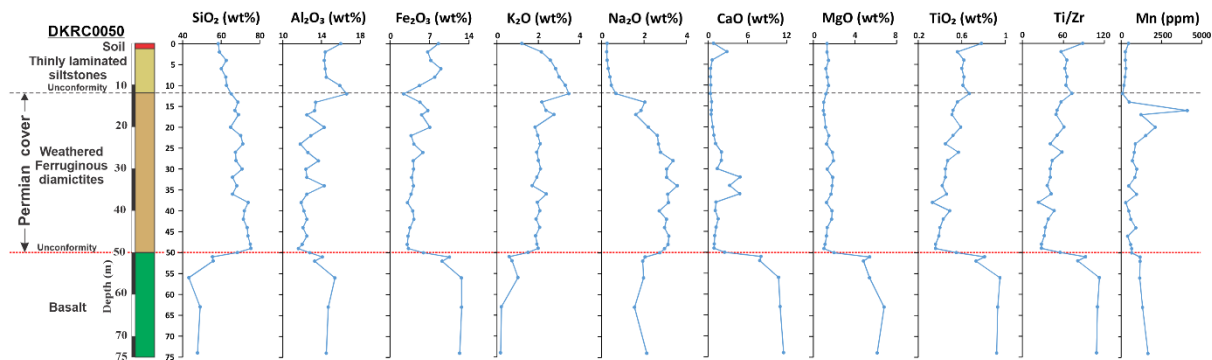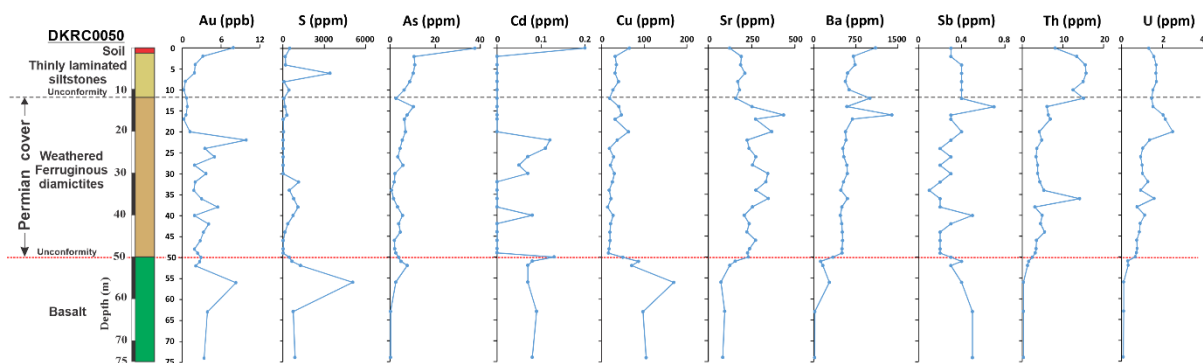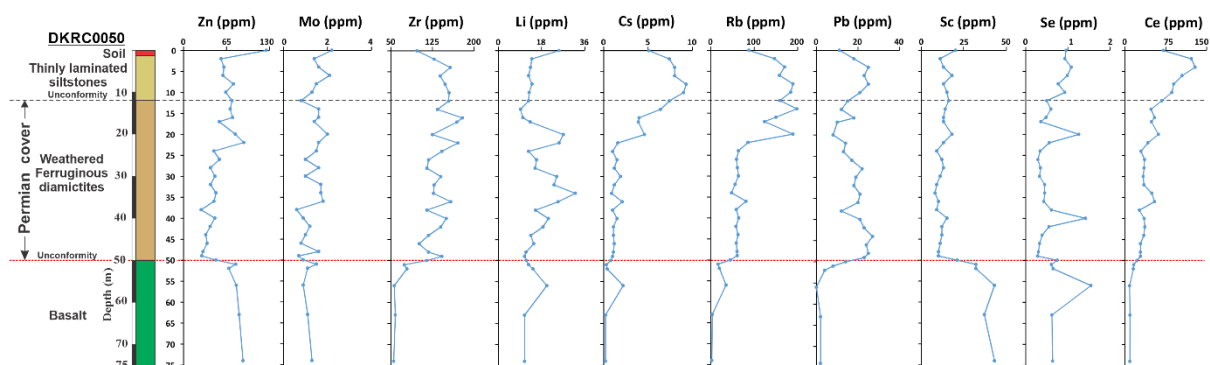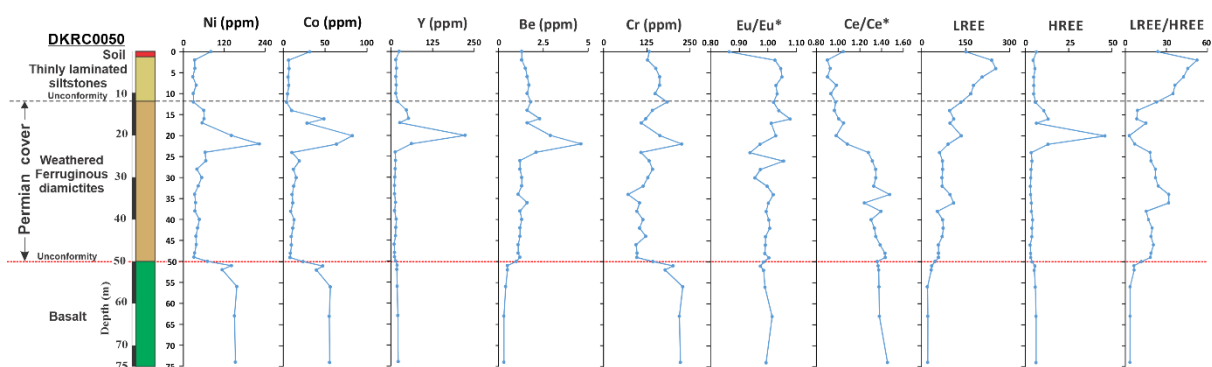

Supplement: s1 [file s1]
